# Supplementary material for: Organocatalytic enantioselective aminoalkylation of pyrazol-3-ones with aldimines generated in situ from α-amido sulfones
Source: Royal Society of Chemistry journal article supplement (doi:10.1039/c9ob02252j), 2019-01-01
Supplement: c9ob02252j1.pdf [file c9ob02252j1.pdf]

**Organocatalytic Enantioselective Aminoalkylation of Pyrazol-3-ones with Aldimines Generated in Situ from  $\alpha$ -Amido Sulfones.**

Laura Carceller-Ferrer,<sup>a</sup> Carlos Vila,<sup>a</sup> Gonzalo Blay,<sup>a\*</sup> Isabel Fernández,<sup>a</sup> M. Carmen Muñoz,<sup>b</sup> José R. Pedro<sup>a\*</sup>

<sup>a</sup> Departament de Química Orgànica, Facultat de Química, Universitat de València, Dr. Moliner 50, 46100 Burjassot, València (Spain).

<sup>b</sup> Departament de Física Aplicada, Universitat Politècnica de València, Camino de Vera s/n, 46022 València (Spain)

## General Experimental Methods

Commercial reagents were used as purchased. Reactions were monitored by TLC (thin layer chromatography) analysis using Merck Silica Gel 60 F-254 thin layer plates. Flash column chromatography was performed on Merck silica gel 60, 0.040–0.063 mm. Melting points were determined in capillary tubes. NMR spectra were run in a Bruker DPX300 spectrometer (Bruker, Billerica, MA, USA) at 300 MHz for  $^1\text{H}$  and at 75 MHz for  $^{13}\text{C}$  using residual non-deuterated solvent as internal standard ( $\text{CHCl}_3$ :  $\delta$  7.26 for  $^1\text{H}$  and 77.0 ppm for  $^{13}\text{C}$ ;  $\text{DMSO-d}_6$   $\delta$  2.50 for  $^1\text{H}$  and 39.52 ppm for  $^{13}\text{C}$ ). Chemical shifts are given in ppm. The carbon type was determined by DEPT (Distortionless Enhancement by Polarization Transfer) experiments. High resolution mass spectra (ESI) were recorded on a TRIPLETO<sup>FT</sup>5600 spectrometer (AB Sciex, Warrington, UK) equipped with an electrospray source with a capillary voltage of 4.5 kV (ESI). Specific optical rotations were measured using sodium light (D line 589 nm). Chiral HPLC (High performance liquid chromatography) analyses were performed in a chromatograph equipped with a UV diode-array detector using chiral stationary columns from Daicel.  $\alpha$ -amidosulfones **1** derivatives were prepared as described in the literature.<sup>1</sup> Pyrazolone derivatives **2** were prepared as described in the literature.<sup>2</sup>

### General procedure for the racemic reaction with $\alpha$ -amidosulfones **1** and pyrazolones **2**.

In a 5 mL vial,  $\alpha$ -amidosulfone (**1**, 0.2 mmol), pyrazolone (**2**, 0.1 mmol),  $\text{Na}_2\text{CO}_3$  (0.15 mmol) and achiral catalyst (3-((3,5-bis(trifluoromethyl)phenyl)amino)-4-((2-(dimethylamino)ethyl)amino)cyclobut-3-ene-1,2-dione) (**K**, 10 mol %, 4.1 mg) in DCM (1 mL): $\text{H}_2\text{O}$  (0.5 mL). The mixture was stirred at room temperature until completion (TLC). The mixture was extracted with DCM (3x20 mL), the combined organic layers were dried over  $\text{MgSO}_4$  (anh.) and solvent was removed under reduced pressure. The residue was purified by column chromatography being eluted with hexane/ $\text{Et}_2\text{O}$  50:50 to hexane/ $\text{Et}_2\text{O}$  20:80, affording the non-acetylated intermediate, which was subjected to acetylation with  $\text{Ac}_2\text{O}$  (0.2 mmols, 19  $\mu\text{L}$ ) and  $\text{Et}_3\text{N}$  (30 mol %, 0.03 mmols, 5  $\mu\text{L}$ ) in DCM (2 mL) at room temperature. The resulting product was purified by column chromatography being eluted with hexane/ $\text{Et}_2\text{O}$  50:50 to hexane/ $\text{Et}_2\text{O}$  20:80.

### Procedure for the enantioselective reaction with $\alpha$ -amidosulfones **1** and pyrazolones **2**.

In a 5 mL vial,  $\alpha$ -amidosulfone (**1**, 0.3 mmol), pyrazolone (**2**, 0.2 mmol),  $\text{Na}_2\text{CO}_3$  (0.3 mmol) and catalyst (**E**, 6.2 mg, 5 mol %) in DCM (1 mL): $\text{H}_2\text{O}$  (0.5 mL). The mixture was stirred at 4 °C until completion (TLC). The mixture was extracted with DCM (3x20 mL), the combined organic layers were dried over  $\text{MgSO}_4$  (anh.) and solvent was removed under reduced pressure. The residue was purified by column chromatography being eluted with hexane/ $\text{Et}_2\text{O}$  50:50 to hexane/ $\text{Et}_2\text{O}$  20:80, affording the non-acetylated intermediate, which was subjected to acetylation with  $\text{Ac}_2\text{O}$  (0.4 mmols, 38  $\mu\text{L}$ ) and  $\text{Et}_3\text{N}$  (30 mol %, 0.06 mmols, 9  $\mu\text{L}$ ) in DCM (2 mL) at room temperature. The resulting product

was purified by column chromatography being eluted with hexane/Et<sub>2</sub>O 50:50 to hexane/Et<sub>2</sub>O 20:80.

## References

- 1- J. B. F. N. Engberts, J. Strating, *Recl. Trav. Chim. Pays-Bas*. **1964**, 83, 733.
- 2-. (a) L. Carpino, *J. Am. Chem. Soc.* **1958**, 80, 599; (b) J. Sun, C. –G. Yan, Y. Han, *Synthetic Commun.*, **2001**, 31, 151; (c) A. Mazzanti, T. Calbet, M.Font-Bardia, A. Moyano, R. Rios, *Org. Biomol. Chem.*, **2012**, 10, 1645.

### Characterization data for compounds 3

#### Benzyl ((5-hydroxy-3-methyl-1-phenyl-1*H*-pyrazol-4-yl)(phenyl)methyl)carbamate

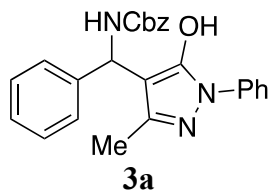

Enantiomeric excess (98%) was determined by chiral HPLC (Chiralpak<sup>®</sup> IC), hexane-*i*PrOH 80:20, 1.0 mL/min, major enantiomer  $t_r$  = 23.97 min, minor enantiomer  $t_r$  = 13.70 min. Yellow Oil;  $[\alpha_D^{20}]$  = +4.5 (*c* 1.33, CHCl<sub>3</sub>).

**<sup>1</sup>H NMR** (300 MHz, MeOD)  $\delta$  7.66-7.56 (m, 2H), 7.45 (t, *J* = 7.9 Hz, 2H), 7.42-7.17 (m, 11H), 5.83 (s, 1H), 5.10 (s, 2H), 2.09 (s, 3H). **<sup>13</sup>C NMR** (75 MHz, MeOD)  $\delta$  159.0 (C), 148.8 (C), 143.6 (C), 139.1 (C), 138.3 (C), 135.8 (C), 131.1 (CH), 130.4 (CH), 130.3 (CH), 129.8 (CH), 129.6 (CH), 129.0 (CH), 128.5 (CH), 128.4 (CH), 123.3 (CH), 107.5 (C), 68.6 (CH<sub>2</sub>), 51.7 (CH), 12.2 (CH<sub>3</sub>). **HRMS** (ESI) *m/z* 414.1820 [M+H]<sup>+</sup>, C<sub>25</sub>H<sub>24</sub>N<sub>3</sub>O<sub>3</sub> requires 414.1812.

#### 4-(((Benzyloxy)carbonyl)amino)(phenyl)methyl)-3-methyl-1-phenyl-1*H*-pyrazol-5-yl acetate

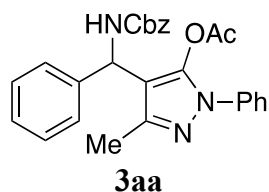

Enantiomeric excess (96%) was determined by chiral HPLC (Chiralpak<sup>®</sup> IC), hexane-*i*PrOH 80:20, 1.0 mL/min, major enantiomer  $t_r$  = 16.67 min, minor enantiomer  $t_r$  = 14.63 min. Yellow Oil;  $[\alpha_D^{20}]$  = -88.3 (*c* 1.1, CHCl<sub>3</sub>).

**<sup>1</sup>H NMR** (300 MHz, CDCl<sub>3</sub>)  $\delta$  7.51-7.20 (m, 15H), 6.10 (d, *J* = 8.8 Hz, 1H), 5.58 (d, *J* = 8.6 Hz, 1H), 5.17 (s, 2H), 2.27 (s, 3H), 1.74 (s, 3H). **<sup>13</sup>C NMR** (75 MHz, CDCl<sub>3</sub>)  $\delta$  167.9 (C), 155.7 (C), 148.1 (C), 141.5 (C), 139.3 (C), 137.6 (C), 136.4 (C), 129.1 (CH), 128.5 (CH), 128.4 (CH), 128.1 (CH), 127.4 (CH), 127.2 (CH), 126.2 (CH), 123.0 (CH), 109.1 (C), 67.0 (CH<sub>2</sub>), 48.9 (CH), 19.8 (CH<sub>3</sub>), 13.1 (CH<sub>3</sub>). **HRMS** (ESI) *m/z* 456.1898 [M+H]<sup>+</sup>, C<sub>27</sub>H<sub>26</sub>N<sub>3</sub>O<sub>4</sub> requires 456.1918.

#### 4-(((*tert*-Butoxycarbonyl)amino)(phenyl)methyl)-3-methyl-1-phenyl-1*H*-pyrazol-5-yl acetate

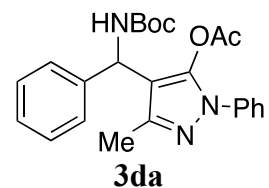

Enantiomeric excess (66%) was determined by chiral HPLC (Chiralpak<sup>®</sup> IC), hexane-*i*PrOH 80:20, 1.0 mL/min, major enantiomer  $t_r$  = 7.62 min, minor enantiomer  $t_r$  = 6.27 min.

min. White Solid; mp = 123-125 °C;  $[\alpha_D^{20}] = +4.0$  (*c* 1.12, MeOH).

**<sup>1</sup>H NMR** (300 MHz, CDCl<sub>3</sub>) δ 7.46-7.36 (m, 4H), 7.35-7.23 (m, 6H), 6.03 (d, *J* = 8.4 Hz, 1H), 5.29 (d, *J* = 8.8 Hz, 1H), 2.27 (s, 3H), 1.76 (s, 3H), 1.48 (s, 9H). **<sup>13</sup>C NMR** (75 MHz, CDCl<sub>3</sub>) δ 168.0 (C), 155.1 (C), 148.2 (C), 141.4 (C), 139.8 (C), 137.6 (C), 129.1 (CH), 128.4 (CH), 127.3 (CH), 127.1 (CH), 126.3 (CH), 122.9 (CH), 109.5 (C), 79.7 (C), 48.4 (CH), 28.4 (CH<sub>3</sub>), 19.9 (CH<sub>3</sub>), 13.1 (CH<sub>3</sub>). **HRMS** (ESI) *m/z* 422.2070 [M+H]<sup>+</sup> C<sub>24</sub>H<sub>28</sub>N<sub>3</sub>O<sub>4</sub> requires 422.2074.

**Ethyl N-((5-hydroxy-3-methyl-1-phenyl-1*H*-pyrazol-4-yl)(phenyl)methyl)methanimidoperoxoate**

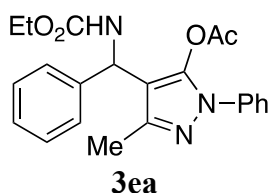

Enantiomeric excess (88%) was determined by chiral HPLC (Chiralpak<sup>®</sup> IC), hexane-*i*PrOH 80:20, 1.0 mL/min, major enantiomer *t<sub>r</sub>* = 15.13 min, minor enantiomer *t<sub>r</sub>* = 12.97 min. White Solid; mp = 135-137 °C;  $[\alpha_D^{20}] = +1.0$  (*c* 1.3, MeOH).

**<sup>1</sup>H NMR** (300 MHz, CDCl<sub>3</sub>) δ 7.46-7.38 (m, 4H), 7.37-7.23 (m, 6H), 6.07 (d, *J* = 8.7 Hz, 1H), 5.48 (d, *J* = 8.4 Hz, 1H), 4.17 (q, *J* = 7.1 Hz, 2H), 2.28 (s, 3H), 1.76 (s, 3H), 1.27 (t, *J* = 7.2 Hz, 3H). **<sup>13</sup>C NMR** (75 MHz, CDCl<sub>3</sub>) δ 168.0 (C), 156.0 (C), 148.2 (C), 141.5 (C), 139.6 (C), 137.6 (C), 129.2 (CH), 128.5 (CH), 127.5 (CH), 127.2 (CH), 126.3 (CH), 123.0 (CH), 109.4 (C), 61.2 (CH<sub>2</sub>), 48.8 (CH), 19.9 (CH<sub>3</sub>), 14.6 (CH<sub>3</sub>), 13.1 (CH<sub>3</sub>). **HRMS** (ESI) *m/z* 394.1754 [M+H]<sup>+</sup> C<sub>22</sub>H<sub>24</sub>N<sub>3</sub>O<sub>4</sub> requires 394.1761.

**4-(((Benzyloxy)carbonyl)amino)(*p*-tolyl)methyl)-3-methyl-1-phenyl-1*H*-pyrazol-5-yl acetate**

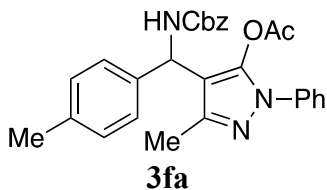

Enantiomeric excess (86%) was determined by chiral HPLC (Chiralpak<sup>®</sup> ADH), hexane-*i*PrOH 80:20, 1.0 mL/min, major enantiomer *t<sub>r</sub>* = 9.46 min, minor enantiomer *t<sub>r</sub>* = 6.97 min. White Solid; mp = 124-126 °C;  $[\alpha_D^{20}] = -67.9$  (*c* 0.93, MeOH).

**<sup>1</sup>H NMR** (300 MHz, CDCl<sub>3</sub>) δ 7.49-7.26 (m, 10H), 7.21 (d, *J* = 8.1 Hz, 2H), 7.15 (d, *J* = 8.1 Hz, 2H), 6.06 (d, *J* = 8.6 Hz, 1H), 5.57 (d, *J* = 8.6 Hz, 1H), 5.17 (s, 2H), 2.34 (s, 3H), 2.26 (s, 3H), 1.78 (s, 3H). **<sup>13</sup>C NMR** (75 MHz, CDCl<sub>3</sub>) δ 167.9 (C), 155.6 (C), 148.0 (C), 141.4 (C), 137.6 (C), 136.7 (C), 136.4 (C), 136.3 (C), 129.1 (CH), 128.4 (CH), 128.1 (CH), 128.09 (CH), 127.3 (CH), 126.1 (CH), 122.9 (CH), 109.2 (C), 66.9 (CH<sub>2</sub>), 48.8 (CH), 21.0 (CH<sub>3</sub>), 19.8 (CH<sub>3</sub>), 13.1 (CH<sub>3</sub>). **HRMS** (ESI) *m/z* 470.2065 [M+H]<sup>+</sup>, C<sub>28</sub>H<sub>28</sub>N<sub>3</sub>O<sub>4</sub> requires 470.2074.

**4-(((Benzyloxy)carbonyl)amino)(*m*-tolyl)methyl)-3-methyl-1-phenyl-1*H*-pyrazol-5-yl acetate**

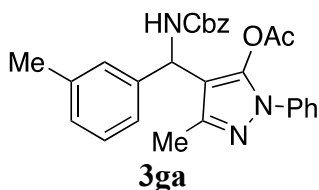

Enantiomeric excess (94%) was determined by chiral HPLC (Chiralpak<sup>®</sup> IC), hexane-*i*PrOH 80:20, 1.0 mL/min, major enantiomer  $t_r$  = 21,43 min, minor enantiomer  $t_r$  = 14,45min. Yellow Oil;  $[\alpha_D^{20}] = -85,9$  ( $c$  0.96, MeOH).

**<sup>1</sup>H NMR** (300 MHz, CDCl<sub>3</sub>)  $\delta$  7.49-7.17 (m, 12H), 7.16-7.00 (m, 2H), 6.06 (d,  $J$  = 8.8 Hz, 1H), 5.57 (d,  $J$  = 8.8 Hz, 1H), 5.18 (s, 2H), 2.34 (s, 3H), 2.28 (s, 3H), 1.76 (s, 3H). **<sup>13</sup>C NMR** (75 MHz, CDCl<sub>3</sub>)  $\delta$  167.9 (C), 155.7 (C), 148.1 (C), 141.5 (C), 139.2 (C), 138.0 (C), 137.6 (C), 136.4 (C), 129.1 (CH), 129.0 (CH), 128.5 (CH), 128.3 (CH), 128.1 (CH), 127.9 (CH), 127.4 (CH), 126.9 (CH), 123.3 (CH), 122.9 (CH), 109.2 (C), 66.9 (CH<sub>2</sub>), 48.9 (CH), 21.4 (CH<sub>3</sub>), 19.8 (CH<sub>3</sub>), 13.0 (CH<sub>3</sub>). **HRMS** (ESI)  $m/z$  470.2079 [M+H]<sup>+</sup>, C<sub>28</sub>H<sub>28</sub>N<sub>3</sub>O<sub>4</sub> requires 470.2074.

**4-(((Benzyloxy)carbonyl)amino)(*o*-tolyl)methyl)-3-methyl-1-phenyl-1*H*-pyrazol-5-yl acetate**

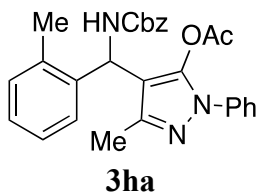

Enantiomeric excess (74%) was determined by chiral HPLC (Chiralpak<sup>®</sup> ADH), hexane-*i*PrOH 80:20, 1.0 mL/min, major enantiomer  $t_r$  = 11.67 min, minor enantiomer  $t_r$  = 18.00 min. Orange Oil;  $[\alpha_D^{20}] = -102.5$  ( $c$  0.95, MeOH).

**<sup>1</sup>H NMR** (300 MHz, CDCl<sub>3</sub>)  $\delta$  7.42-7.24 (m, 12H), 7.22-7.16 (m, 2H), 6.07 (d,  $J$  = 8.5 Hz, 1H), 5.63 (d,  $J$  = 8.5 Hz, 1H), 5.19 (d,  $J$  = 12.3 Hz, 1H), 5.12 (d,  $J$  = 12.2 Hz, 1H), 2.31 (s, 3H), 2.19 (s, 3H), 1.72 (s, 3H). **<sup>13</sup>C NMR** (75 MHz, CDCl<sub>3</sub>)  $\delta$  167.9 (C), 155.3 (C), 148.1 (C), 141.4 (C), 137.44 (C), 137.37 (C), 136.4 (C), 135.6 (C), 130.8 (CH), 129.0 (CH), 128.4 (CH), 128.1 (CH), 127.4 (CH), 127.3 (CH), 125.7 (CH), 124.8 (CH), 122.9 (CH), 107.8 (C), 66.9 (CH<sub>2</sub>), 47.2 (CH), 19.9 (CH<sub>3</sub>), 19.1 (CH<sub>3</sub>), 12.8 (CH<sub>3</sub>). **HRMS** (ESI)  $m/z$  470.2063 [M+H]<sup>+</sup>, C<sub>28</sub>H<sub>28</sub>N<sub>3</sub>O<sub>4</sub> requires 470.2074.

**4-(((Benzyloxy)carbonyl)amino)(4-methoxyphenyl)methyl)-3-methyl-1-phenyl-1*H*-pyrazol-5-yl acetate**

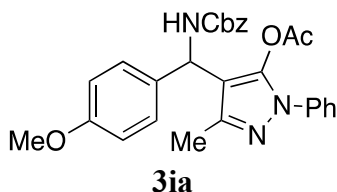

Enantiomeric excess (27%) was determined by chiral HPLC (Chiralpak<sup>®</sup> IC), hexane-

iPrOH 80:20, 1.0 mL/min, major enantiomer  $t_R$  = 27.57 min, minor enantiomer  $t_R$  = 25.21 min. White Solid; mp = 113-115 °C;  $[\alpha_D^{20}]$  = -8.3 ( $c$  0.95, MeOH).

**$^1\text{H}$  NMR** (300 MHz,  $\text{CDCl}_3$ )  $\delta$  7.48-7.27 (m, 10H), 7.23 (d,  $J$  = 8.2 Hz, 2H), 6.87 (d,  $J$  = 8.8 Hz, 2H), 6.03 (d,  $J$  = 8.7 Hz, 1H), 5.57 (d,  $J$  = 8.7 Hz, 1H), 5.17 (s, 2H), 3.79 (s, 3H), 2.24 (s, 3H), 1.81 (s, 3H).  **$^{13}\text{C}$  NMR** (75 MHz,  $\text{CDCl}_3$ )  $\delta$  168.0 (C), 158.8 (C), 155.7 (C), 148.1 (C), 141.5 (C), 137.7 (C), 136.5 (C), 131.5 (C), 129.2 (CH), 128.6 (CH), 128.2 (CH), 128.2 (CH), 127.5 (CH), 127.5 (CH), 123.0 (CH), 113.9 (CH), 109.3 (C), 67.0 ( $\text{CH}_2$ ), 55.4 ( $\text{CH}_3$ ), 48.7 (CH), 20.0 ( $\text{CH}_3$ ), 13.2 ( $\text{CH}_3$ ). **HRMS** (ESI)  $m/z$  486.2030  $[\text{M}+\text{H}]^+$ ,  $\text{C}_{28}\text{H}_{28}\text{N}_3\text{O}_5$  requires 486.2023.

**4-((((Benzyloxy)carbonyl)amino)(3-methoxyphenyl)methyl)-3-methyl-1-phenyl-1H-pyrazol-5-yl acetate**

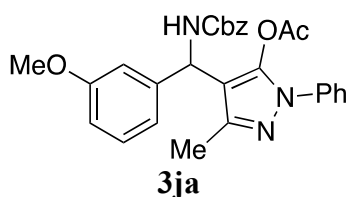

Enantiomeric excess (99%) was determined by chiral HPLC (Chiralpak<sup>®</sup> IC), hexane-iPrOH 80:20, 1.0 mL/min, major enantiomer  $t_R$  = 33.99 min, minor enantiomer  $t_R$  = 24.67 min. Yellow Oil;  $[\alpha_D^{20}]$  = -19.7 ( $c$  0.67,  $\text{CHCl}_3$ ).

**$^1\text{H}$  NMR** (400 MHz,  $\text{CHCl}_3$ )  $\delta$  7.47-7.27 (m, 10H), 7.24 (d,  $J$  = 8.0 Hz, 1H), 6.94-6.87 (m, 1H), 6.86 (d,  $J$  = 1.5 Hz, 1H), 6.80 (dd,  $J$  = 8.2, 2.5 Hz, 1H), 6.05 (d,  $J$  = 8.7 Hz, 1H), 5.57 (d,  $J$  = 8.7 Hz, 1H), 5.17 (s, 2H), 3.77 (s, 3H), 2.27 (s, 3H), 1.80 (s, 3H).  **$^{13}\text{C}$  NMR** (126 MHz,  $\text{CDCl}_3$ )  $\delta$  168.0 (C), 159.7 (C), 155.6 (C), 148.0 (C), 141.5 (C), 141.1 (C), 137.5 (C), 136.4 (C), 129.5 (CH), 129.1 (CH), 128.5 (CH), 128.12 (CH), 128.06 (CH), 127.4 (CH), 122.9 (CH), 118.5 (CH), 112.6 (CH), 112.0 (CH), 109.1 (C), 66.9 ( $\text{CH}_2$ ), 55.2 ( $\text{CH}_3$ ), 48.9 (CH), 19.8 ( $\text{CH}_3$ ), 13.0 ( $\text{CH}_3$ ). **HRMS** (ESI)  $m/z$  486.2028  $[\text{M}+\text{H}]^+$ ,  $\text{C}_{28}\text{H}_{28}\text{N}_3\text{O}_5$  requires 486.2023.

**4-((((Benzyloxy)carbonyl)amino)(4-fluorophenyl)methyl)-3-methyl-1-phenyl-1H-pyrazol-5-yl acetate**

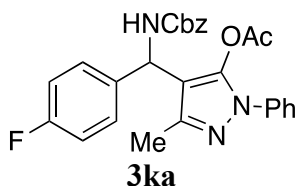

Enantiomeric excess (91%) was determined by chiral HPLC (Chiralpak<sup>®</sup> IC), hexane-iPrOH 80:20, 1.0 mL/min, major enantiomer  $t_R$  = 14.09 min, minor enantiomer  $t_R$  = 10.35 min. White Solid; mp = 100-102 °C;  $[\alpha_D^{20}]$  = -34.6 ( $c$  0.92, MeOH).

**$^1\text{H}$  NMR** (400 MHz,  $\text{CDCl}_3$ )  $\delta$  7.47-7.28 (m, 12H), 7.03 (t,  $J$  = 8.6 Hz, 2H), 6.05 (d,  $J$  = 8.6 Hz, 1H), 5.55 (d,  $J$  = 8.7 Hz, 1H), 5.17 (s, 2H), 2.25 (s, 3H), 1.81 (s, 3H).  **$^{13}\text{C}$  NMR** (101 MHz,  $\text{CDCl}_3$ )  $\delta$  167.8 (C), 161.95 (d,  $J_{\text{C-F}}$  = 245.9 Hz, C), 155.7 (C), 147.9 (C), 141.4 (C), 137.5 (C), 136.3 (C), 135.2 (C), 129.1 (CH), 128.5 (CH), 128.2 (CH), 128.1 (CH), 127.9 (d,  $J_{\text{C-F}}$  = 8.0 Hz, CH), 127.5 (CH), 123.0 (CH), 115.25 (d,  $J_{\text{C-F}}$  = 21.3 Hz,

CH), 109.01 (C), 67.1 (CH<sub>2</sub>), 48.5 (CH), 19.9 (CH<sub>3</sub>), 13.1 (CH<sub>3</sub>). **<sup>19</sup>F NMR** (282 MHz, CDCl<sub>3</sub>) δ -115.52 (s). **HRMS** (ESI) m/z 479.1731 [M+H]<sup>+</sup>, C<sub>27</sub>H<sub>25</sub>FN<sub>3</sub>O<sub>4</sub> requires 479.1724.

**4-(((Benzyloxy)carbonyl)amino)(4-bromophenyl)methyl)-3-methyl-1-phenyl-1H-pyrazol-5-yl acetate**

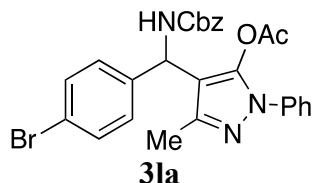

Enantiomeric excess (88%) was determined by chiral HPLC (Chiralpak<sup>®</sup> IC), hexane-iPrOH 80:20, 1.0 mL/min, major enantiomer t<sub>r</sub> = 16.57 min, minor enantiomer t<sub>r</sub> = 12.43 min. White Solid; mp = 129-130 °C; [α]<sub>D</sub><sup>20</sup> = -27.4 (c 0.94, MeOH).

**<sup>1</sup>H NMR** (300 MHz, CDCl<sub>3</sub>) δ 7.46 (d, *J* = 8.5 Hz, 2H), 7.43-7.28 (m, 10H), 7.20 (d, *J* = 7.9 Hz, 2H), 6.03 (d, *J* = 8.5 Hz, 1H), 5.58 (d, *J* = 8.6 Hz, 1H), 5.17 (s, 2H), 2.25 (s, 3H), 1.81 (s, 3H). **<sup>13</sup>C NMR** (75 MHz, CDCl<sub>3</sub>) δ 167.8 (C), 155.6 (C), 147.9 (C), 141.4 (C), 138.6 (C), 137.4 (C), 136.2 (C), 131.4 (CH), 129.1 (CH), 128.5 (CH), 128.2 (CH), 128.1 (CH), 128.0 (CH), 127.5 (CH), 122.9 (CH), 121.0 (C), 108.7 (C), 67.1 (CH<sub>2</sub>), 48.5 (CH), 19.9 (CH<sub>3</sub>), 13.0 (CH<sub>3</sub>). **HRMS** (ESI) m/z 534.1002 [M+H]<sup>+</sup>, C<sub>27</sub>H<sub>25</sub>BrN<sub>3</sub>O<sub>4</sub> requires 534.1023.

**4-(((Benzyloxy)carbonyl)amino)(3-chlorophenyl)methyl)-3-methyl-1-phenyl-1H-pyrazol-5-yl acetate**

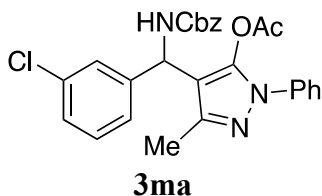

Enantiomeric excess (96%) was determined by chiral HPLC (Chiralcel<sup>®</sup> ADH), hexane-iPrOH 80:20, 0.7 mL/min, major enantiomer t<sub>r</sub> = 23.81 min, minor enantiomer t<sub>r</sub> = 25.51 min. Colorless Oil; [α]<sub>D</sub><sup>20</sup> = -93.3 (c 1.84, CHCl<sub>3</sub>).

**<sup>1</sup>H NMR** (300 MHz, CDCl<sub>3</sub>) δ 7.44-7.26 (m, 13H), 7.22-7.15 (m, 1H), 6.05 (d, *J* = 8.5 Hz, 1H), 5.61 (d, *J* = 8.5 Hz, 1H), 5.17 (s, 2H), 2.27 (s, 3H), 1.82 (s, 3H). **<sup>13</sup>C NMR** (75 MHz, CDCl<sub>3</sub>) δ 167.9 (C), 155.6 (C), 147.9 (C), 141.8 (C), 141.4 (C), 137.4 (C), 136.2 (C), 134.4 (C), 129.7 (CH), 129.1 (CH), 128.5 (CH), 128.2 (CH), 128.1 (CH), 127.5 (CH), 127.4 (CH), 126.2 (CH), 124.6 (CH), 123.0 (CH), 108.7 (C), 67.1 (CH<sub>2</sub>), 48.5 (CH), 19.8 (CH<sub>3</sub>), 13.0 (CH<sub>3</sub>). **HRMS** (ESI) m/z 490.1521 [M+H]<sup>+</sup>, C<sub>27</sub>H<sub>25</sub>ClN<sub>3</sub>O<sub>4</sub> requires 490.1528.



**4-(((Benzyloxy)carbonyl)amino)(naphthalen-1-yl)methyl)-3-methyl-1-phenyl-1*H*-pyrazol-5-yl acetate**

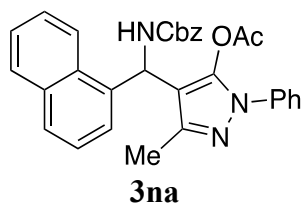

Enantiomeric excess (56%) was determined by chiral HPLC (Chiralcel<sup>®</sup> ODH), hexane-*i*PrOH 80:20, 1.0 mL/min, major enantiomer  $t_r$  = 16,16 min, minor enantiomer  $t_r$  = 9,87 min. White Solid; mp = 64-66 °C;  $[\alpha_D^{20}] = +99.6$  ( $c$  1.84, CHCl<sub>3</sub>).

**<sup>1</sup>H NMR** (400 MHz, CDCl<sub>3</sub>)  $\delta$  7.84-7.65 (m, 3H), 7.49-7.26 (m, 11H), 7.25-7.17 (m, 3H), 6.59 (d,  $J$  = 8.5 Hz, 1H), 5.62 (d,  $J$  = 8.5 Hz, 1H), 5.14 (d,  $J$  = 12.3 Hz, 1H), 5.08 (d,  $J$  = 12.2 Hz, 1H), 2.31 (s, 3H), 1.58 (s, 3H). **<sup>13</sup>C NMR** (126 MHz, CDCl<sub>3</sub>)  $\delta$  168.1 (C), 155.4 (C), 147.8 (C), 141.5 (C), 137.4 (C), 136.4 (C), 134.8 (C), 133.9 (C), 130.5 (C), 129.0 (CH), 128.7 (CH), 128.52 (CH), 128.50 (CH), 128.4 (CH), 128.1 (CH), 127.4 (CH), 126.4 (CH), 125.8 (CH), 124.9 (CH), 123.4 (CH), 123.0 (CH), 122.9 (CH), 108.9 (C), 67.0 (CH<sub>2</sub>), 47.1 (CH), 19.9 (CH<sub>3</sub>), 13.0 (CH<sub>3</sub>). **HRMS** (ESI)  $m/z$  506.2081 [M+H]<sup>+</sup>, C<sub>31</sub>H<sub>28</sub>N<sub>3</sub>O<sub>4</sub> requires 506.2074.

**4-(((Benzyloxy)carbonyl)amino)(thiophen-3-yl)methyl)-3-methyl-1-phenyl-1*H*-pyrazol-5-yl acetate**

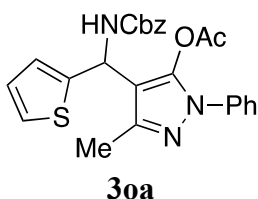

Enantiomeric excess (94%) was determined by chiral HPLC (Chiralpak<sup>®</sup> IC), hexane-*i*PrOH 80:20, 1.0 mL/min, major enantiomer  $t_r$  = 24,65 min, minor enantiomer  $t_r$  = 16,96 min. White Solid; mp = 124-126 °C;  $[\alpha_D^{20}] = -1.3$  ( $c$  1,05, CHCl<sub>3</sub>).

**<sup>1</sup>H NMR** (300 MHz, CDCl<sub>3</sub>)  $\delta$  7.56-7.27 (m, 10H), 7.24 (d,  $J$  = 4.5 Hz, 1H), 7.04-6.82 (m, 2H), 6.25 (d,  $J$  = 8.9 Hz, 1H), 5.72 (d,  $J$  = 8.9 Hz, 1H), 5.17 (s, 2H), 2.29 (s, 3H), 1.90 (s, 3H). **<sup>13</sup>C NMR** (75 MHz, CDCl<sub>3</sub>)  $\delta$  168.0 (C), 155.6 (C), 147.7 (C), 144.3 (C), 141.6 (C), 137.6 (C), 136.3 (C), 129.2 (CH), 128.6 (CH), 128.23 (CH), 128.20 (CH), 127.6 (CH), 126.9 (CH), 124.9 (CH), 124.6 (CH), 123.1 (CH), 108.9 (C), 67.17 (CH<sub>2</sub>), 46.1 (CH), 20.0 (CH<sub>3</sub>), 13.1 (CH<sub>3</sub>). **HRMS** (ESI)  $m/z$  462.1486 [M+H]<sup>+</sup>, C<sub>25</sub>H<sub>24</sub>N<sub>3</sub>O<sub>4</sub>S requires 462.1482.

**4-(((Benzyloxy)carbonyl)amino)(thiophen-2-yl)methyl)-3-methyl-1-phenyl-1*H*-pyrazol-5-yl acetate**

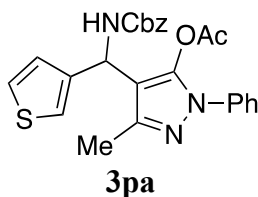

Enantiomeric excess (54%) was determined by chiral HPLC (Chiralpak<sup>®</sup> IC), hexane-iPrOH 80:20, 1.0 mL/min, major enantiomer  $t_r$  = 26,96 min, minor enantiomer  $t_r$  = 15,43 min. White Solid; mp = 133-134 °C;  $[\alpha_D^{20}] = +48.3$  ( $c$  1.74, CHCl<sub>3</sub>).

**<sup>1</sup>H NMR** (300 MHz, CDCl<sub>3</sub>)  $\delta$  7.51-7.20 (m, 11H), 7.11 (s, 1H), 6.94 (dd,  $J$  = 5.0, 0.9 Hz, 1H), 6.07 (d,  $J$  = 8.7 Hz, 1H), 5.64 (d,  $J$  = 8.4 Hz, 1H), 5.17 (s, 2H), 2.28 (s, 3H), 1.86 (s, 3H). **<sup>13</sup>C NMR** (75 MHz, CDCl<sub>3</sub>)  $\delta$  168.1 (C), 155.7 (C), 147.9 (C), 141.5 (C), 141.2 (C), 137.6 (C), 136.4 (C), 129.2 (CH), 128.6 (CH), 128.2 (CH), 127.5 (CH), 126.8 (CH), 126.3 (CH), 123.02 (CH), 123.02 (CH), 120.9 (CH), 108.7 (C), 67.1 (CH<sub>2</sub>), 46.2 (CH), 19.9 (CH<sub>3</sub>), 13.1 (CH<sub>3</sub>). **HRMS** (ESI)  $m/z$  462.1489 [M+H]<sup>+</sup>, C<sub>25</sub>H<sub>24</sub>N<sub>3</sub>O<sub>4</sub>S requires 462.1482.

**4-(((Benzyloxy)carbonyl)amino)(phenyl)methyl)-1-(4-methoxyphenyl)-3-methyl-1H-pyrazol-5-yl acetate**

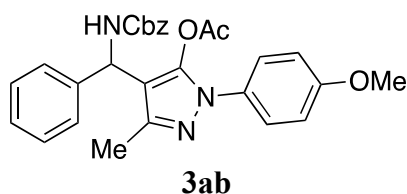

Enantiomeric excess (88%) was determined by chiral HPLC (Chiralcel<sup>®</sup> ODH), hexane-iPrOH 80:20, 1.0 mL/min, major enantiomer  $t_r$  = 12,55 min, minor enantiomer  $t_r$  = 11,10 min. White Solid; mp = 44-45 °C;  $[\alpha_D^{20}] = -81.0$  ( $c$  1.03, CHCl<sub>3</sub>).

**<sup>1</sup>H NMR** (300 MHz, CDCl<sub>3</sub>)  $\delta$  7.49-7.13 (m, 12H), 6.90 (d,  $J$  = 9.1 Hz, 2H), 6.08 (d,  $J$  = 8.6 Hz, 1H), 5.57 (d,  $J$  = 8.6 Hz, 1H), 5.17 (s, 2H), 3.81 (s, 3H), 2.26 (s, 3H), 1.72 (s, 3H). **<sup>13</sup>C NMR** (75 MHz, CDCl<sub>3</sub>)  $\delta$  168.1 (C), 159.0 (C), 155.8 (C), 147.7 (C), 141.5 (C), 139.5 (C), 136.5 (C), 130.6 (C), 128.58 (CH), 128.55 (CH), 128.48 (CH), 128.2 (CH), 127.2 (CH), 126.3 (CH), 124.9 (CH), 114.3 (CH), 108.7 (C), 67.0 (CH<sub>2</sub>), 55.5 (CH<sub>3</sub>), 49.0 (CH), 19.8 (CH<sub>3</sub>), 13.1 (CH<sub>3</sub>). **HRMS** (ESI)  $m/z$  486.2019 [M+H]<sup>+</sup>, C<sub>28</sub>H<sub>28</sub>N<sub>3</sub>O<sub>5</sub> requires 486.2023.

**4-(((Benzyloxy)carbonyl)amino)(phenyl)methyl)-1-(4-chlorophenyl)-3-methyl-1H-pyrazol-5-yl acetate**

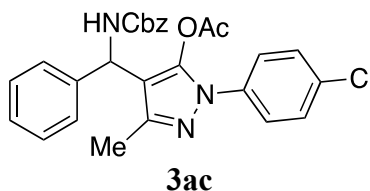

Enantiomeric excess (84%) was determined by chiral HPLC (Chiralpak<sup>®</sup> ADH), hexane-iPrOH 80:20, 1.0 mL/min, major enantiomer  $t_r$  = 19,87 min, minor enantiomer  $t_r$  = 24,71 min. White Solid; mp = 142-144 °C;  $[\alpha_D^{20}] = -72.6$  ( $c$  1.07, CHCl<sub>3</sub>).

**<sup>1</sup>H NMR** (300 MHz, CDCl<sub>3</sub>)  $\delta$  7.39-7.13 (m, 14H), 6.00 (d,  $J$  = 8.7 Hz, 1H), 5.47 (d,  $J$  = 8.6 Hz, 1H), 5.09 (s, 2H), 2.17 (s, 3H), 1.67 (s, 3H). **<sup>13</sup>C NMR** (75 MHz, CDCl<sub>3</sub>)  $\delta$  167.8 (C), 155.7 (C), 148.5 (C), 141.5 (C), 139.1 (C), 136.3 (C), 136.1 (C), 133.0 (C), 129.7 (CH), 129.3 (CH), 128.5 (CH), 128.2 (CH), 128.1 (CH), 127.3 (CH), 126.2 (CH), 124.0

(CH), 109.5 (C), 67.0 (CH<sub>2</sub>), 48.9 (CH), 19.8 (CH<sub>3</sub>), 13.1 (CH<sub>3</sub>). **HRMS** (ESI) *m/z* 490.1521 [M+H]<sup>+</sup>, C<sub>27</sub>H<sub>25</sub>ClN<sub>3</sub>O<sub>4</sub> requires 490.1528.

**4-(((Benzyloxy)carbonyl)amino)(phenyl)methyl)-1-(3,4-dimethylphenyl)-3-methyl-1*H*-pyrazol-5-yl acetate**

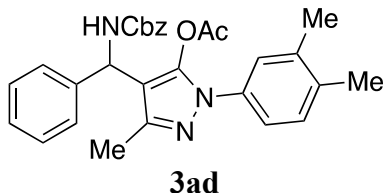

Enantiomeric excess (94%) was determined by chiral HPLC (Chiralcel<sup>®</sup> ODH), hexane-*i*PrOH 80:20, 1.0 mL/min, major enantiomer *t<sub>r</sub>* = 9,58 min, minor enantiomer *t<sub>r</sub>* = 7,57 min. White Solid; mp = 83-84 °C; [ $\alpha_D^{20}$ ] = -72.1 (*c* 1.02, CHCl<sub>3</sub>).

**<sup>1</sup>H NMR** (300 MHz, CDCl<sub>3</sub>)  $\delta$  7.39-7.22 (m, 11H), 7.15-7.07 (m, 2H), 6.10 (d, *J* = 8.7 Hz, 1H), 5.64 (d, *J* = 8.6 Hz, 1H), 5.20 (d, *J* = 12 Hz, 1H), 5.15 (d, *J* = 12 Hz, 1H), 2.26 (s, 9H), 1.74 (s, 3H). **<sup>13</sup>C NMR** (75 MHz, CDCl<sub>3</sub>)  $\delta$  167.9 (C), 155.7 (C), 147.6 (C), 141.3 (C), 139.4 (C), 137.7 (C), 136.3 (C), 136.0 (C), 135.2 (C), 129.9 (CH), 128.4 (CH), 128.3 (CH), 128.1 (CH), 128.0 (CH), 127.1 (CH), 126.2 (CH), 124.2 (CH), 120.0 (CH), 108.8 (C), 66.9 (CH<sub>2</sub>), 48.9 (CH), 19.74 (CH<sub>3</sub>), 19.70 (CH<sub>3</sub>), 19.3 (CH<sub>3</sub>), 13.0 (CH<sub>3</sub>). **HRMS** (ESI) *m/z* 484.2236 [M+H]<sup>+</sup>, C<sub>29</sub>H<sub>30</sub>N<sub>3</sub>O<sub>4</sub> requires 484.2231.

**4-(((Benzyloxy)carbonyl)amino)(phenyl)methyl)-3-ethyl-1-phenyl-1*H*-pyrazol-5-yl acetate**

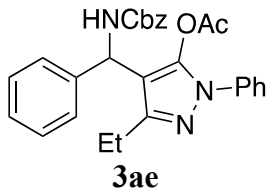

Enantiomeric excess (96%) was determined by chiral HPLC (Chiralcel<sup>®</sup> ODH), hexane-*i*PrOH 80:20, 1.0 mL/min, major enantiomer *t<sub>r</sub>* = 7,69 min, minor enantiomer *t<sub>r</sub>* = 6,59 min. White Solid; mp = 102-103 °C; [ $\alpha_D^{20}$ ] = -95.7 (*c* 1.2, CHCl<sub>3</sub>).

**<sup>1</sup>H NMR** (300 MHz, CDCl<sub>3</sub>)  $\delta$  7.47-7.20 (m, 15H), 6.13 (d, *J* = 8.7 Hz, 1H), 5.65 (d, *J* = 8.8 Hz, 1H), 5.21 (d, *J* = 12.0 Hz, 1H), 5.15 (d, *J* = 11.9 Hz, 1H), 2.75-2.62 (m, 2H), 1.72 (s, 3H), 1.28 (t, *J* = 7.5 Hz, 3H). **<sup>13</sup>C NMR** (75 MHz, CDCl<sub>3</sub>)  $\delta$  168.0 (C), 155.6 (C), 153.2 (C), 141.3 (C), 139.5 (C), 137.6 (C), 136.4 (C), 129.1 (CH), 128.5 (CH), 128.4 (CH), 128.12 (CH), 128.10 (CH), 127.3 (CH), 127.1 (CH), 126.1 (CH), 123.0 (CH), 108.6 (C), 66.9 (CH<sub>2</sub>), 48.6 (CH), 20.8 (CH<sub>2</sub>), 19.8 (CH<sub>3</sub>), 13.1 (CH<sub>3</sub>). **HRMS** (ESI) *m/z* 470.2069 [M+H]<sup>+</sup>, C<sub>28</sub>H<sub>27</sub>N<sub>3</sub>O<sub>4</sub> requires 470.2074.

**4-(((Benzyloxy)carbonyl)amino)(phenyl)methyl)-1,3-diphenyl-1H-pyrazol-5-yl acetate**

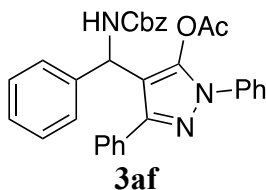

Enantiomeric excess (91%) was determined by chiral HPLC (Chiralpak<sup>®</sup> IC), hexane-iPrOH 80:20, 1.0 mL/min, major enantiomer  $t_r$  = 19,49 min, minor enantiomer  $t_r$  = 30,45 min. White Solid; mp = 53-54 °C;  $[\alpha_D^{20}] = -43.9$  ( $c$  1.01, CHCl<sub>3</sub>).

**<sup>1</sup>H NMR** (300 MHz, CDCl<sub>3</sub>) 7.68 (dd,  $J$  = 6.3, 2.8 Hz, 2H), 7.61-7.28 (m, 18H), 6.24 (d,  $J$  = 8.5 Hz, 1H), 5.81 (d,  $J$  = 8.4 Hz, 1H), 5.11 (d,  $J$  = 12.0 Hz, 1H), 5.06 (d,  $J$  = 12.1 Hz, 1H), 1.79 (s, 3H). **<sup>13</sup>C NMR** (75 MHz, CDCl<sub>3</sub>)  $\delta$  167.8 (C), 155.3 (C), 150.7 (C), 142.2 (C), 139.8 (C), 137.5 (C), 136.6 (C), 132.6 (C), 129.1 (CH), 128.6 (CH), 128.4 (CH), 128.4 (CH), 128.13 (CH), 128.08 (CH), 127.8 (CH), 127.1 (CH), 126.1 (CH), 123.2 (CH), 108.9 (C), 66.9 (CH<sub>2</sub>), 49.2 (CH), 19.9 (CH<sub>3</sub>). **HRMS** (ESI)  $m/z$  518.2069 [M+H]<sup>+</sup>, C<sub>32</sub>H<sub>28</sub>N<sub>3</sub>O<sub>4</sub> requires 518.2074.

**4-(((Benzyloxy)carbonyl)amino)(phenyl)methyl)-1-(4-methoxyphenyl)-3-phenyl-1H-pyrazol-5-yl acetate**

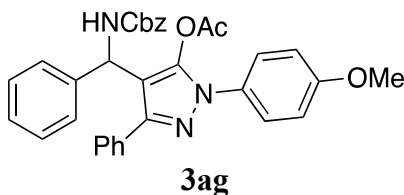

Enantiomeric excess (96%) was determined by chiral HPLC (Chiralpak<sup>®</sup> IC), hexane-iPrOH 80:20, 1.0 mL/min, major enantiomer  $t_r$  = 16,45 min, minor enantiomer  $t_r$  = 37,91 min. White Solid; mp = 46-48 °C;  $[\alpha_D^{20}] = -4.4$  ( $c$  0.88, CHCl<sub>3</sub>).

**<sup>1</sup>H NMR** (300 MHz, CDCl<sub>3</sub>) 7.73-7.62 (m, 2H), 7.48-7.21 (m, 15H), 6.94 (d,  $J$  = 9.0 Hz, 2H), 6.23 (d,  $J$  = 8.4 Hz, 1H), 5.82 (d,  $J$  = 8.4 Hz, 1H), 5.15 (d,  $J$  = 12.3 Hz, 1H), 5.03 (d,  $J$  = 12.0 Hz, 1H), 3.82 (s, 3H), 1.77 (s, 3H). **<sup>13</sup>C NMR** (75 MHz, CDCl<sub>3</sub>)  $\delta$  167.9 (C), 159.2 (C), 155.4 (C), 150.3 (C), 142.2 (C), 140.0 (C), 136.7 (C), 132.7 (C), 130.6 (C), 128.7 (CH), 128.6 (CH), 128.5 (CH), 128.4 (CH), 128.24 (CH), 128.20 (CH), 128.2 (CH), 127.2 (CH), 126.2 (CH), 125.1 (CH), 114.3 (CH), 108.5 (C), 66.9 (CH<sub>2</sub>), 55.5 (CH<sub>3</sub>), 49.3 (CH), 19.9 (CH<sub>3</sub>). **HRMS** (ESI)  $m/z$  548.2171 [M+H]<sup>+</sup>, C<sub>33</sub>H<sub>30</sub>N<sub>3</sub>O<sub>5</sub> requires 548.2180.

**4-(((Benzyloxy)carbonyl)amino)(phenyl)methyl)-1-(4-chlorophenyl)-3-phenyl-1H-pyrazol-5-yl acetate**

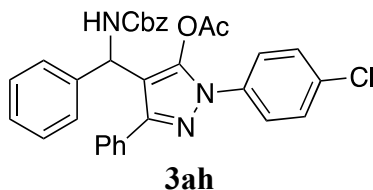

Enantiomeric excess (87%) was determined by chiral HPLC (Chiralpak<sup>®</sup> IC), hexane-

iPrOH 80:20, 1.0 mL/min, major enantiomer  $t_R$  = 9,23 min, minor enantiomer  $t_R$  = 19,57 min. White Solid; mp = 58-59 °C;  $[\alpha_D^{20}]$  = -65.0 (*c* 1.76, CHCl<sub>3</sub>).

**<sup>1</sup>H NMR** (300 MHz, CDCl<sub>3</sub>) 7.64 (dd, *J* = 6.5, 2.8 Hz, 2H), 7.52-7.18 (m, 17H), 6.21 (d, *J* = 8.5 Hz, 1H), 5.76 (d, *J* = 8.4 Hz, 1H), 5.23 (d, *J* = 12.3 Hz, 1H), 5.11 (d, *J* = 12.0 Hz, 1H), 1.80 (s, 3H). **<sup>13</sup>C NMR** (75 MHz, CDCl<sub>3</sub>) δ 167.6 (C), 155.3 (C), 151.0 (C), 142.2 (C), 139.7 (C), 136.5 (C), 136.1 (C), 133.5 (C), 132.3 (C), 129.3 (CH), 128.7 (CH), 128.6 (CH), 128.5 (CH), 128.4 (CH), 128.2 (CH), 128.1 (CH), 128.1 (CH), 127.2 (CH), 126.1 (CH), 124.3 (CH), 109.2 (C), 66.9 (CH<sub>2</sub>), 49.2 (CH), 19.9 (CH<sub>3</sub>). **HRMS** (ESI) *m/z* 552.1677 [M+H]<sup>+</sup>, C<sub>32</sub>H<sub>27</sub>ClN<sub>3</sub>O<sub>4</sub> requires 552.1685.

**4-(((benzyloxy)carbonyl)amino)(phenyl)methyl-1,3-dimethyl-1*H*-pyrazol-5-yl acetate**

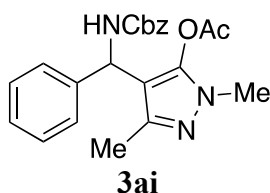

Enantiomeric excess (94%) was determined by chiral HPLC (Chiralpak<sup>®</sup> ADH), hexane-iPrOH 80:20, 1.0 mL/min, major enantiomer  $t_R$  = 23.43 min, minor enantiomer  $t_R$  = 55.50 min. Yellow Oil;  $[\alpha_D^{20}]$  = -60.9 (*c* 0.89, CHCl<sub>3</sub>).

**<sup>1</sup>H NMR** (300 MHz, CDCl<sub>3</sub>) 7.42-7.17 (m, 10H), 6.00 (d, *J* = 8.7 Hz, 1H), 5.48 (d, *J* = 8.7 Hz, 1H), 5.14 (s, 2H), 3.53 (s, 3H), 2.17 (s, 3H), 1.83 (s, 3H). **<sup>13</sup>C NMR** (75 MHz, CDCl<sub>3</sub>) δ 167.9 (C), 155.7 (C), 146.2 (C), 142.1 (C), 139.6 (C), 136.4 (C), 128.5 (CH), 128.5 (CH), 128.2 (CH), 127.2 (CH), 126.3 (CH), 107.3 (C), 66.9 (CH<sub>2</sub>), 49.0 (CH), 34.4 (CH<sub>3</sub>), 19.8 (CH<sub>3</sub>), 12.9 (CH<sub>3</sub>). **HRMS** (ESI) *m/z* 394.1748 [M+H]<sup>+</sup>, C<sub>22</sub>H<sub>24</sub>N<sub>3</sub>O<sub>4</sub> requires 394.1761.

**4-(((benzyloxy)carbonyl)amino)(phenyl)methyl-3-methyl-1-phenyl-1*H*-pyrazol-5-yl benzoate**

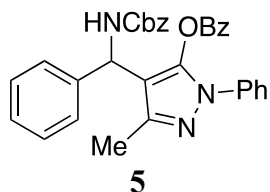

Enantiomeric excess (95%) was determined by chiral HPLC (Chiralpak<sup>®</sup> ADH), hexane-iPrOH 80:20, 1.0 mL/min, major enantiomer  $t_R$  = 17,54 min, minor enantiomer  $t_R$  = 19,84 min. Colorless Oil;  $[\alpha_D^{20}]$  = - 54.2 (*c* 1.09, CHCl<sub>3</sub>).

**<sup>1</sup>H NMR** (300 MHz, CDCl<sub>3</sub>) δ 7.74 (d, *J* = 6.9 Hz, 2H), 7.57 (t, *J* = 7.5 Hz, 1H), 7.48 (d, *J* = 8.0 Hz, 2H), 7.42-7.17 (m, 12H), 7.11 (t, *J* = 7.4 Hz, 2H), 7.01 (t, *J* = 7.0 Hz, 1H), 6.14 (d, *J* = 8.6 Hz, 1H), 5.71 (d, *J* = 8.7 Hz, 1H), 5.14 (s, 2H), 2.34 (s, 3H). **<sup>13</sup>C NMR** (75 MHz, CDCl<sub>3</sub>) δ 163.8 (C), 155.7 (C), 148.2 (C), 141.6 (C), 139.2 (C), 137.6 (C), 136.4 (C), 134.3 (C), 130.3 (CH), 129.1 (CH), 128.5 (CH), 128.44 (CH), 128.40 (CH), 128.3 (CH), 128.1 (CH), 127.3 (CH), 127.0 (CH), 126.9 (CH), 126.1 (CH), 122.8 (CH), 109.46 (C), 66.9 (CH<sub>2</sub>), 49.1 (CH), 13.1 (CH<sub>3</sub>). **HRMS** (ESI) *m/z* 518.2082 [M+H]<sup>+</sup>,

C<sub>32</sub>H<sub>28</sub>N<sub>3</sub>O<sub>4</sub> requires 518.2074.

**4-((((benzyloxy)carbonyl)amino)(phenyl)methyl)-3-methyl-1-phenyl-1H-pyrazol-5-yl methanesulfonate**

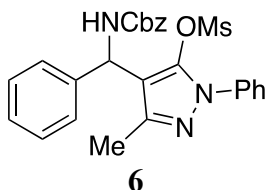

Enantiomeric excess (96%) was determined by chiral HPLC (Phenomenex® Amilose1), hexane- iPrOH 80:20, 1.0 mL/min, major enantiomer  $t_r$  = 30,69 min, minor enantiomer  $t_r$  = 29,13 min. White Solid; m.p = 56-57 °C;  $[\alpha_D^{20}]$  = - 45.6 (*c* 1.07, CHCl<sub>3</sub>).

**<sup>1</sup>H NMR** (300 MHz, CDCl<sub>3</sub>)  $\delta$  7.55 (d, *J* = 7.7 Hz, 2H), 7.46 (t, *J* = 7.6 Hz, 2H), 7.40-7.27 (m, 11H), 6.18 (d, *J* = 9.0 Hz, 1H), 5.85 (d, *J* = 9.1 Hz, 1H), 5.18 (s, 2H), 2.67 (s, 3H), 2.20 (s, 3H). **<sup>13</sup>C NMR (75 MHz, CDCl<sub>3</sub>)**  $\delta$  155.8 (C) 148.4 (C), 139.3 (C), 138.7 (C), 137.4 (C), 136.4 (C), 129.2 (C), 128.47 (CH), 128.46 (CH), 128.1 (CH), 126.6 (CH), 126.4 (CH), 124.0 (CH), 111.1 (CH), 67.0 (CH<sub>2</sub>), 49.0 (CH), 38.6 (CH<sub>3</sub>), 13.4 (CH<sub>3</sub>). **HRMS** (ESI) *m/z* 492.1583 [M+H]<sup>+</sup>, C<sub>26</sub>H<sub>26</sub>N<sub>3</sub>O<sub>5</sub>S requires 492.1588.

**4-((((benzyloxy)carbonyl)amino)(phenyl)methyl)-3-methyl-1-phenyl-1H-pyrazol-5-yl 4-methylbenzenesulfonate**

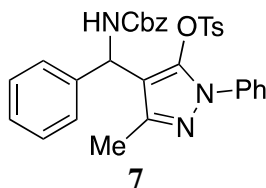

Enantiomeric excess (94%) was determined by chiral HPLC (Chiralpak® ADH), hexane-iPrOH 80:20, 1.0 mL/min, major enantiomer  $t_r$  = 23.08 min, minor enantiomer  $t_r$  = 20.54 min. Colorless Oil,  $[\alpha_D^{20}]$  = -24.4 (*c* 0.99, CHCl<sub>3</sub>).

**<sup>1</sup>H NMR** (400 MHz, CDCl<sub>3</sub>)  $\delta$  7.44-7.26 (m, 11H), 7.23-7.17 (m, 5H), 6.95 (d, *J* = 8.1 Hz, 2H), 6.18 (d, *J* = 9.2 Hz, 1H), 6.06 (d, *J* = 9.3 Hz, 1H), 5.20 (s, 2H), 2.32 (s, 3H), 2.21 (s, 3H). **<sup>13</sup>C NMR** (101 MHz, CDCl<sub>3</sub>)  $\delta$  155.8 (C), 148.4 (C), 146.1 (C), 139.6 (C), 139.3 (C), 137.4 (C), 136.6 (C), 130.8 (C), 129.6 (CH), 128.6 (CH), 128.5 (CH), 128.4 (CH), 128.3 (CH), 128.1 (CH), 128.0 (CH), 127.3 (CH), 127.0 (CH), 123.4 (CH), 126.7 (CH), 111.4 (C), 66.9 (CH<sub>2</sub>), 49.2 (CH), 21.6 (CH<sub>3</sub>), 13.5 (CH<sub>3</sub>). **HRMS** (ESI) *m/z* 568.1897 [M+H]<sup>+</sup>, C<sub>32</sub>H<sub>30</sub>N<sub>3</sub>O<sub>5</sub>S requires 568.1901.

**4-(acetamido(phenyl)methyl)-3-methyl-1-phenyl-1H-pyrazol-5-yl tert-butyl carbonate**

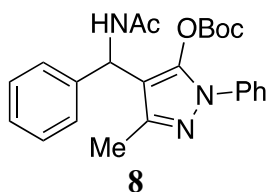

Enantiomeric excess (86%) was determined by chiral HPLC (Chiralpak<sup>®</sup> IC), hexane-iPrOH 80:20, 1.0 mL/min, major enantiomer  $t_R$  = 12.95 min, minor enantiomer  $t_R$  = 19.49 min. Colorless Oil,  $[\alpha_D^{20}] = -29.4$  ( $c$  0.57, CHCl<sub>3</sub>).

**<sup>1</sup>H NMR** (300 MHz, CDCl<sub>3</sub>)  $\delta$  7.58-7.53 (m, 2H), 7.46 (t,  $J$  = 7.6 Hz, 2H), 7.40-7.27 (m, 6H), 6.10 (d,  $J$  = 9.1 Hz, 1H), 5.52 (d,  $J$  = 8.9 Hz, 1H), 2.71 (s, 3H), 2.19 (s, 3H), 1.48 (s, 9H). **<sup>13</sup>C NMR** (101 MHz, CDCl<sub>3</sub>)  $\delta$  169.1 (C), 149.2 (C), 147.9 (C), 141.9 (C), 139.4 (C), 137.6 (C), 129.1 (CH), 128.5 (CH), 127.4 (CH), 127.2 (CH), 126.2 (CH), 122.8 (CH), 109.1 (C), 85.7 (C), 47.1 (CH), 27.2 (CH<sub>3</sub>), 23.3 (CH<sub>3</sub>), 13.1 (CH<sub>3</sub>). **HRMS** (ESI)  $m/z$  422.2079 [M+H]<sup>+</sup> C<sub>24</sub>H<sub>28</sub>N<sub>3</sub>O<sub>4</sub> requires 422.2074.

**4-(((tert-butoxycarbonyl)amino)(phenyl)methyl)-3-methyl-1-phenyl-1H-pyrazol-5-yl methanesulfonate**

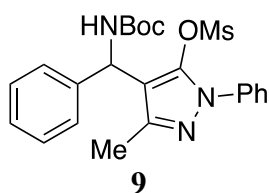

Enantiomeric excess (95%) was determined by chiral HPLC (Chiralpak<sup>®</sup> ADH), hexane-iPrOH 80:20, 1.0 mL/min, major enantiomer  $t_R$  = 11.23 min, minor enantiomer  $t_R$  = 8.67 min. Colorless Oil,  $[\alpha_D^{20}] = -22.8$  ( $c$  0.72, CHCl<sub>3</sub>).

**<sup>1</sup>H NMR** (300 MHz, CDCl<sub>3</sub>)  $\delta$  7.58-7.53 (m, 2H), 7.46 (t,  $J$  = 7.6 Hz, 2H), 7.40-7.27 (m, 6H), 6.10 (d,  $J$  = 9.1 Hz, 1H), 5.52 (d,  $J$  = 8.9 Hz, 1H), 2.71 (s, 3H), 2.19 (s, 3H), 1.48 (s, 9H). **<sup>13</sup>C NMR** (126 MHz, CDCl<sub>3</sub>)  $\delta$  155.2 (C), 148.5 (C), 139.8 (C), 138.8 (C), 137.5 (C), 129.3 (CH), 128.4 (CH), 128.1 (CH), 127.3 (CH), 126.6 (CH), 124.0 (CH), 111.4 (C), 79.8 (C), 48.4 (CH), 38.6 (CH<sub>3</sub>), 28.3 (CH<sub>3</sub>), 13.5 (CH<sub>3</sub>). **HRMS** (ESI)  $m/z$  458.1737 [M+H]<sup>+</sup>, C<sub>23</sub>H<sub>28</sub>N<sub>3</sub>O<sub>5</sub>S requires 458.1744.

# <sup>1</sup>H-NMR and <sup>13</sup>C-NMR SPECTRA

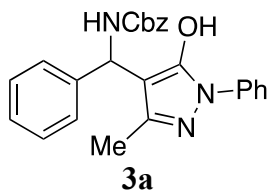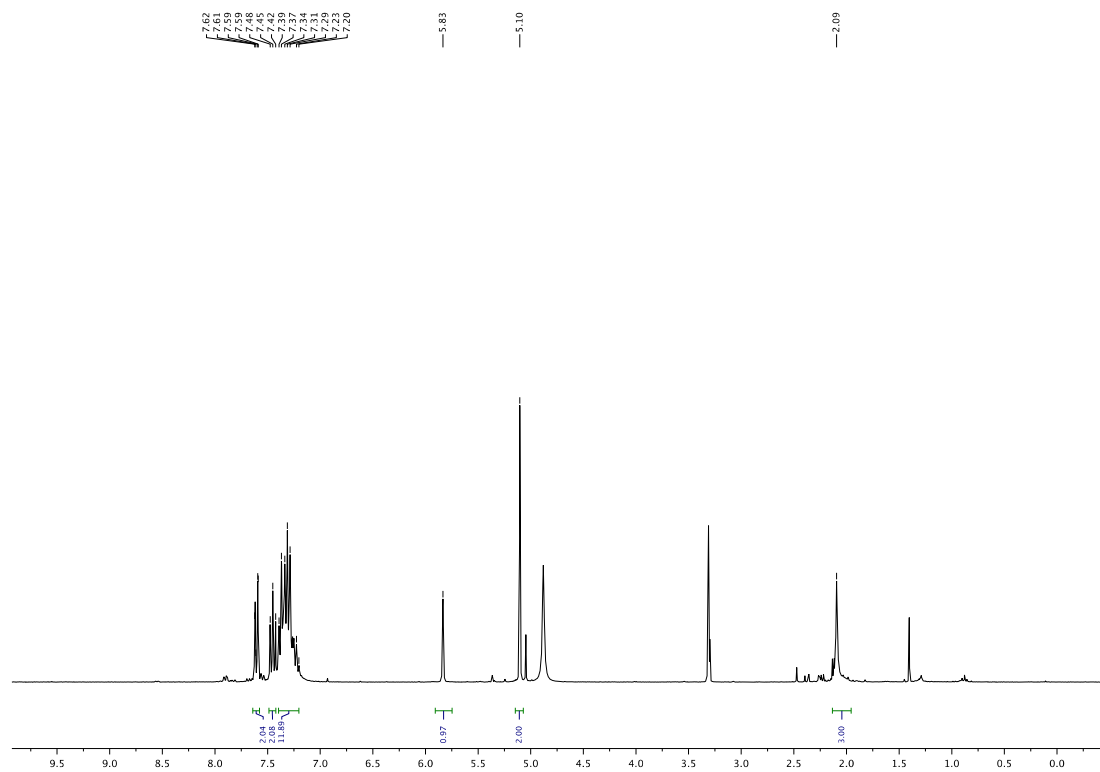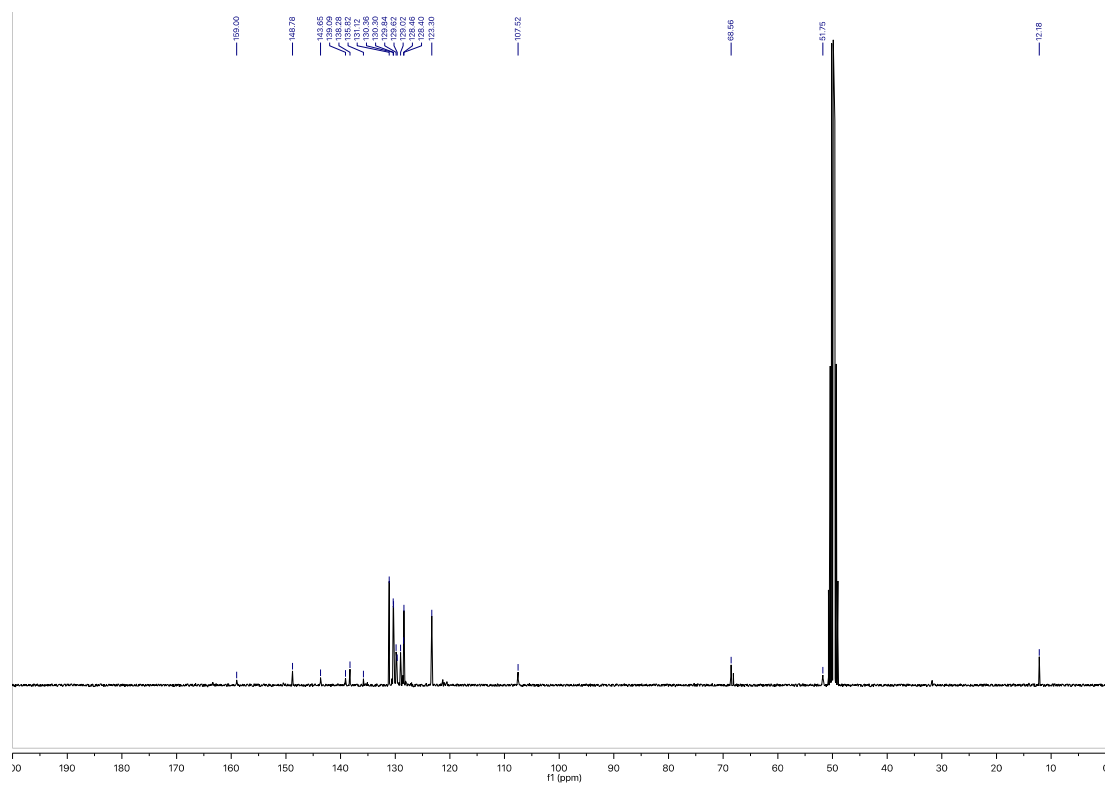



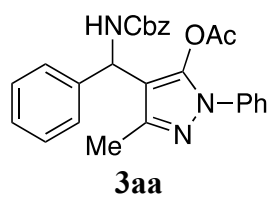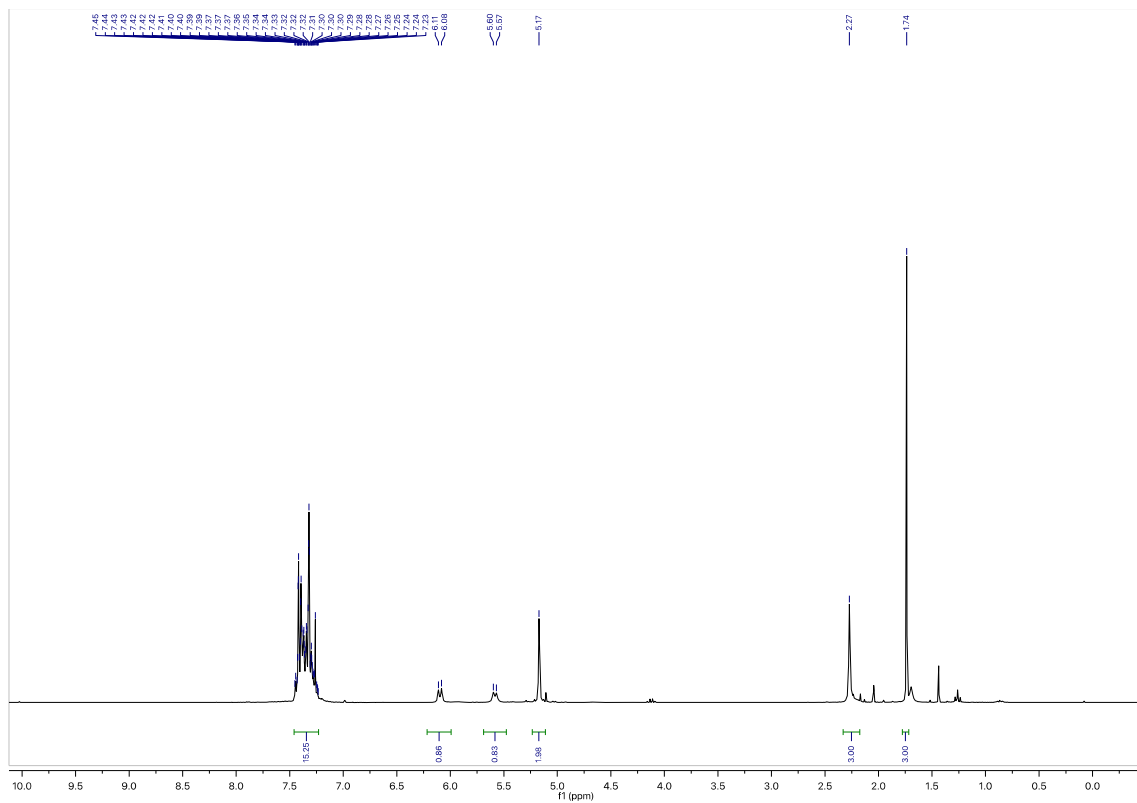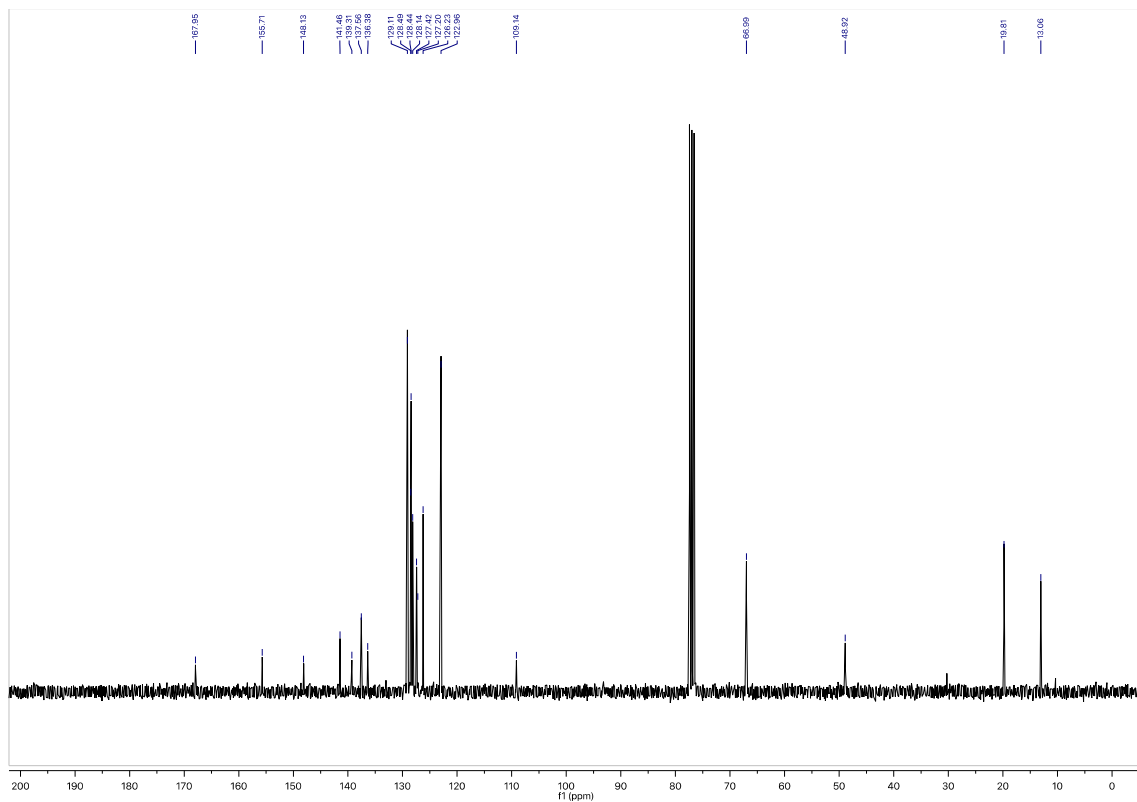

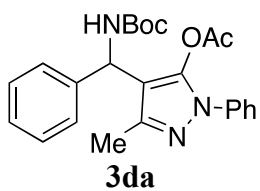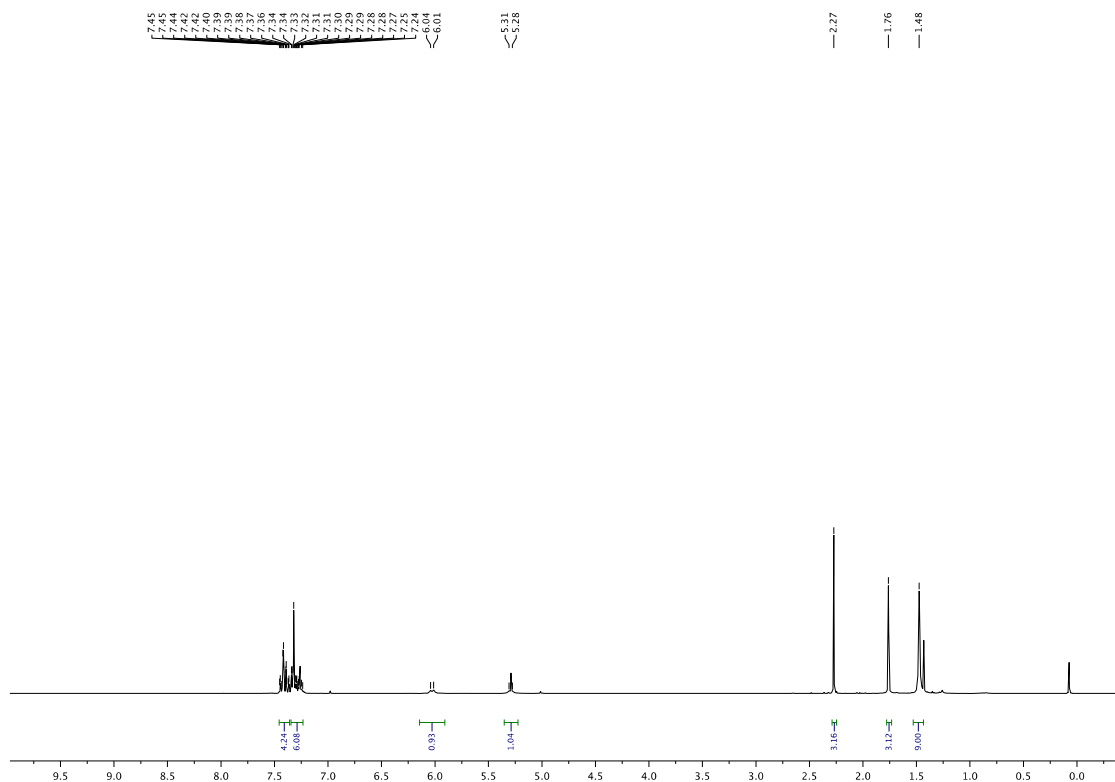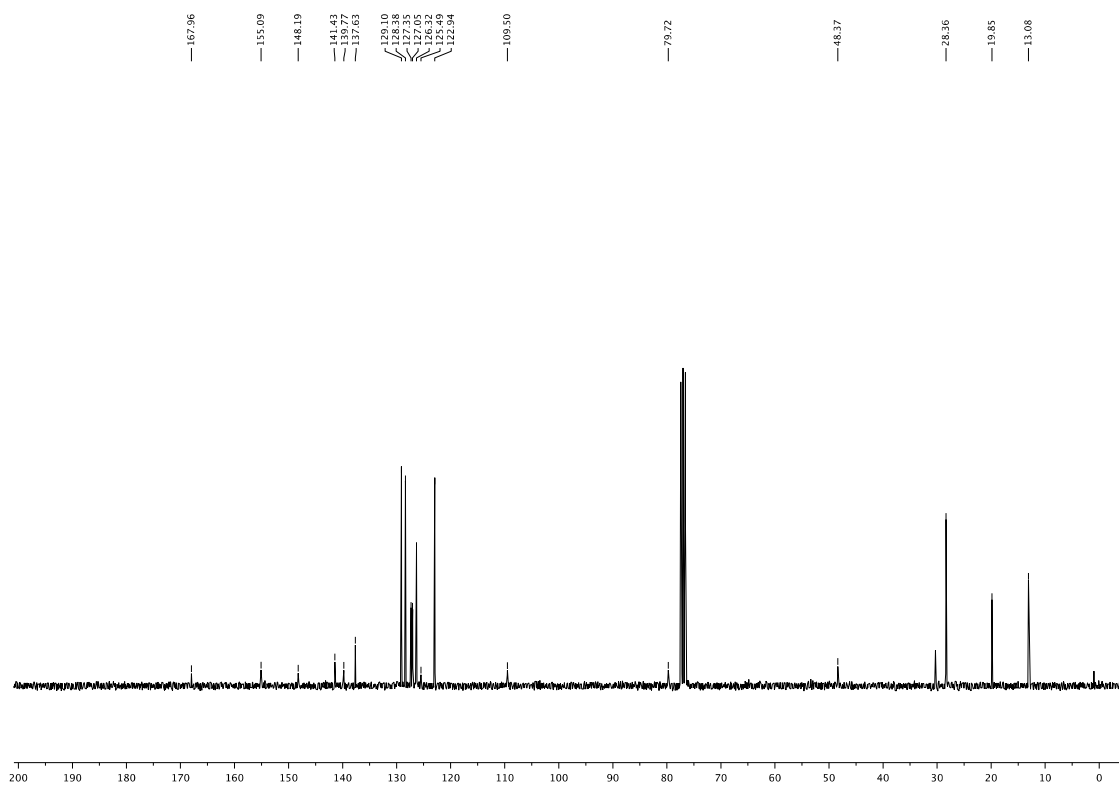

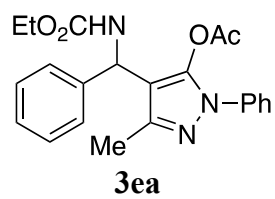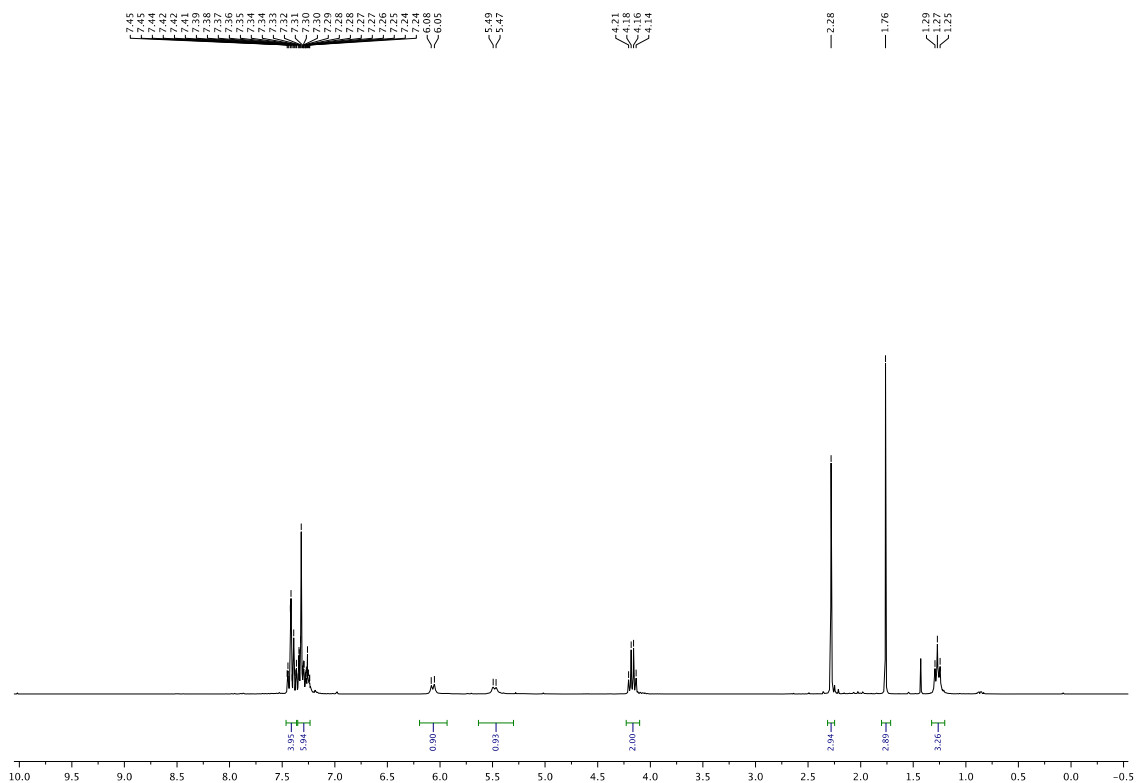

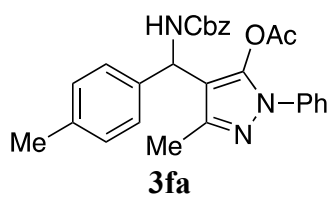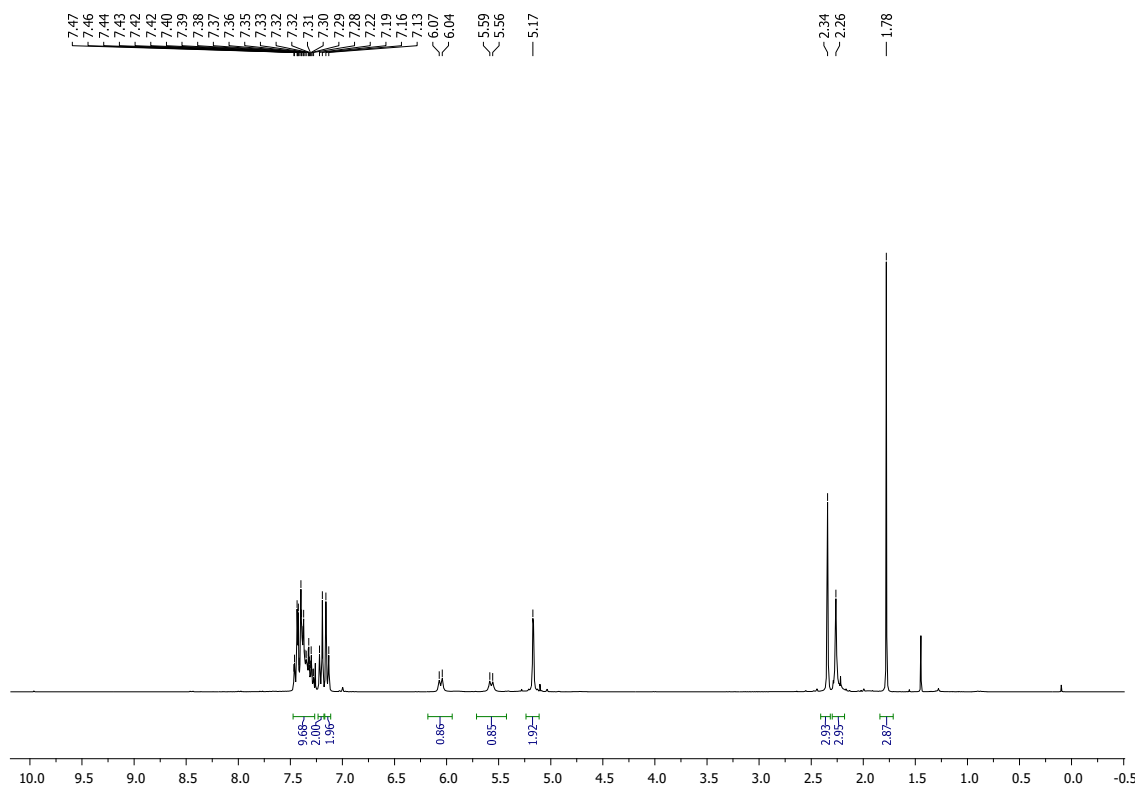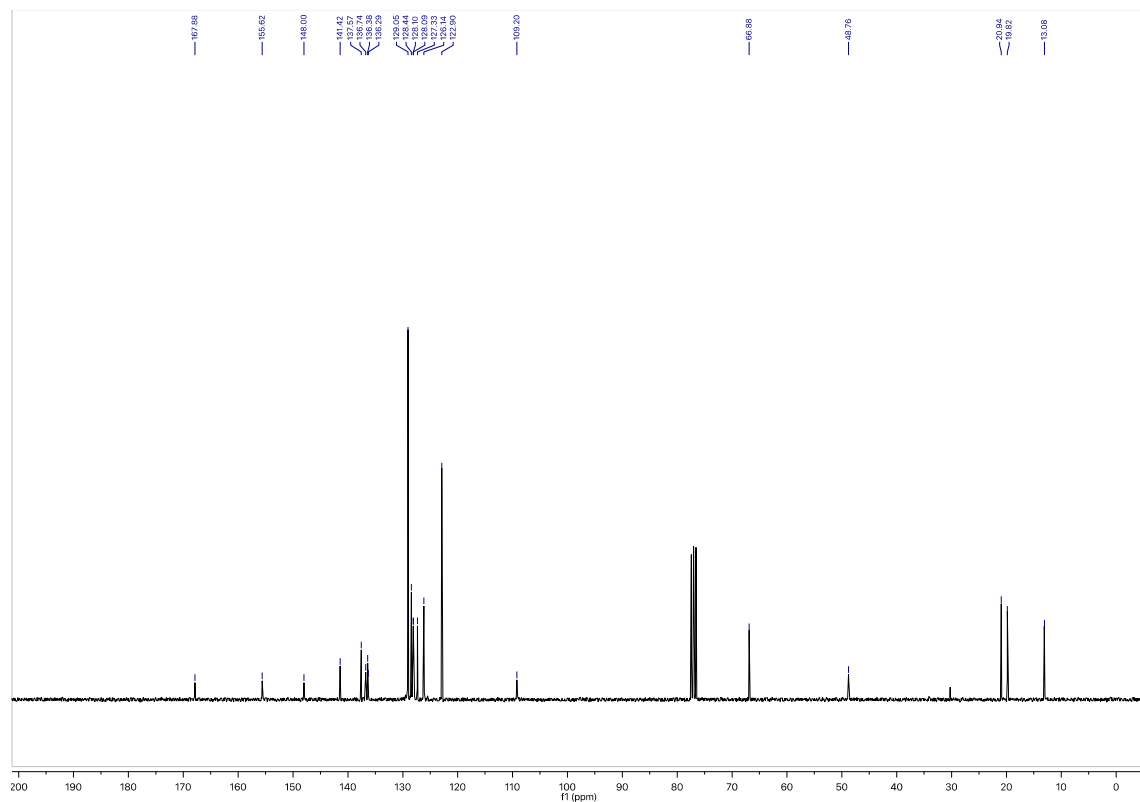



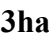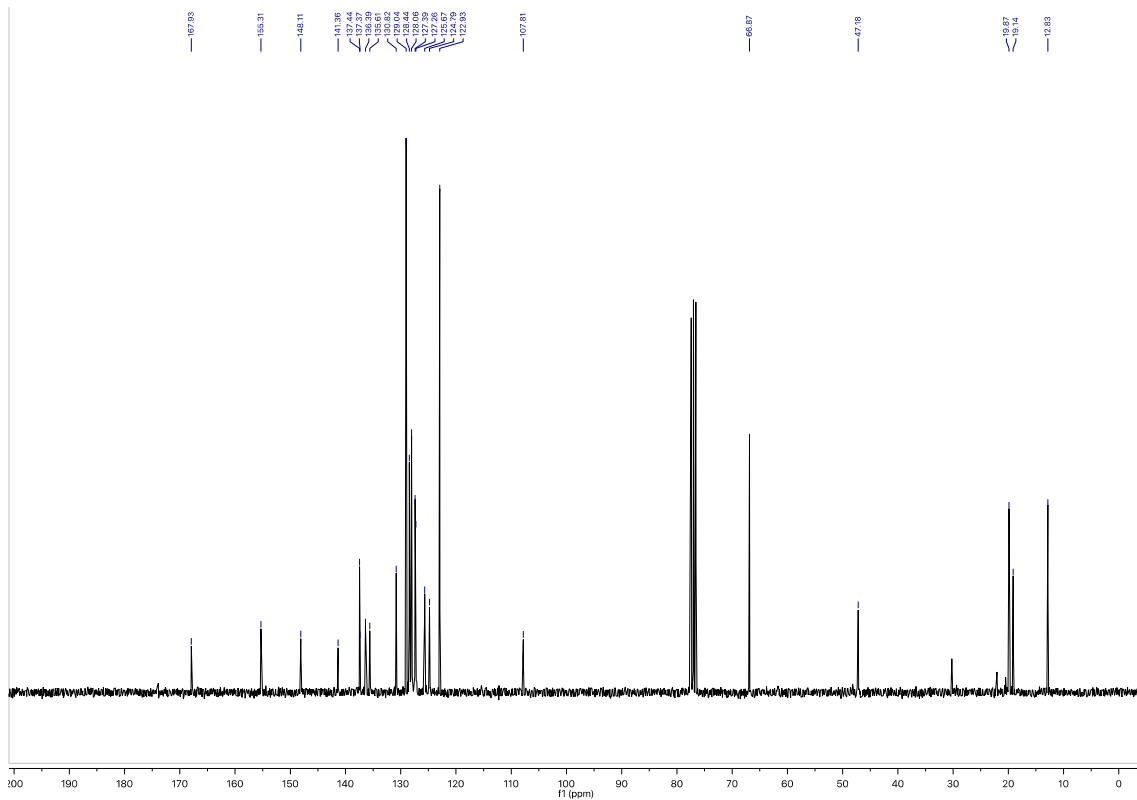

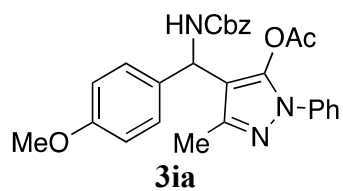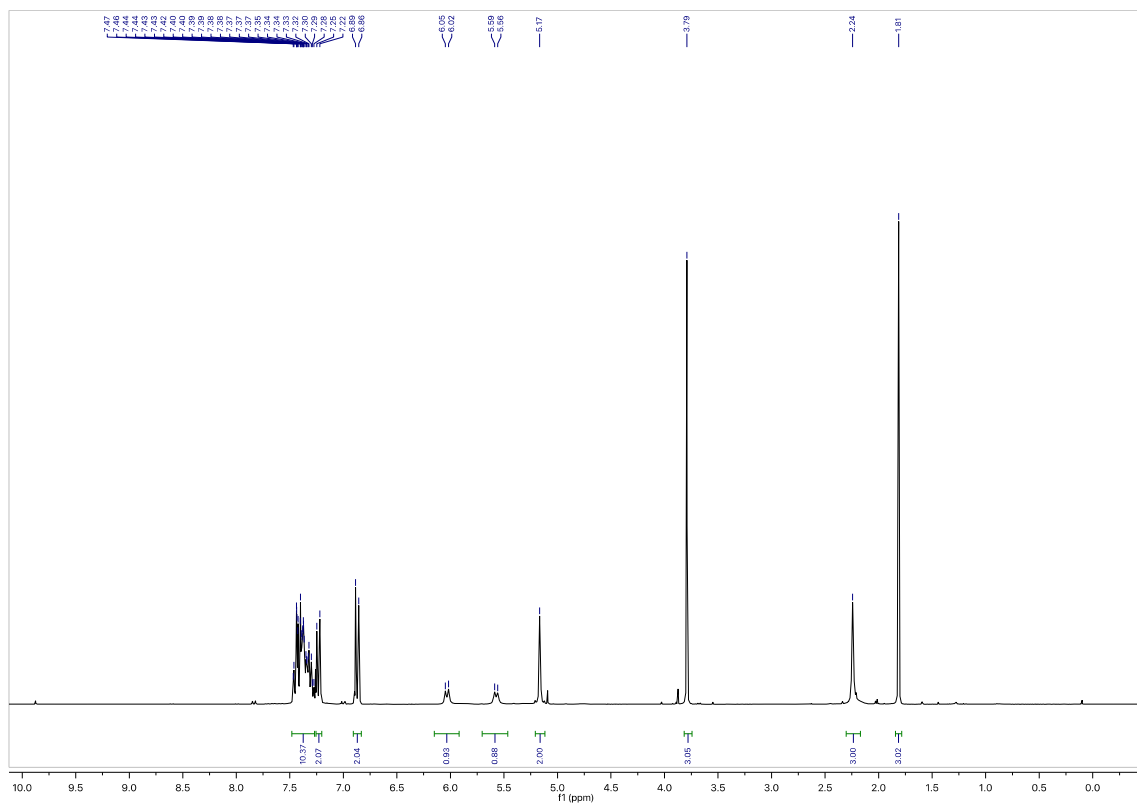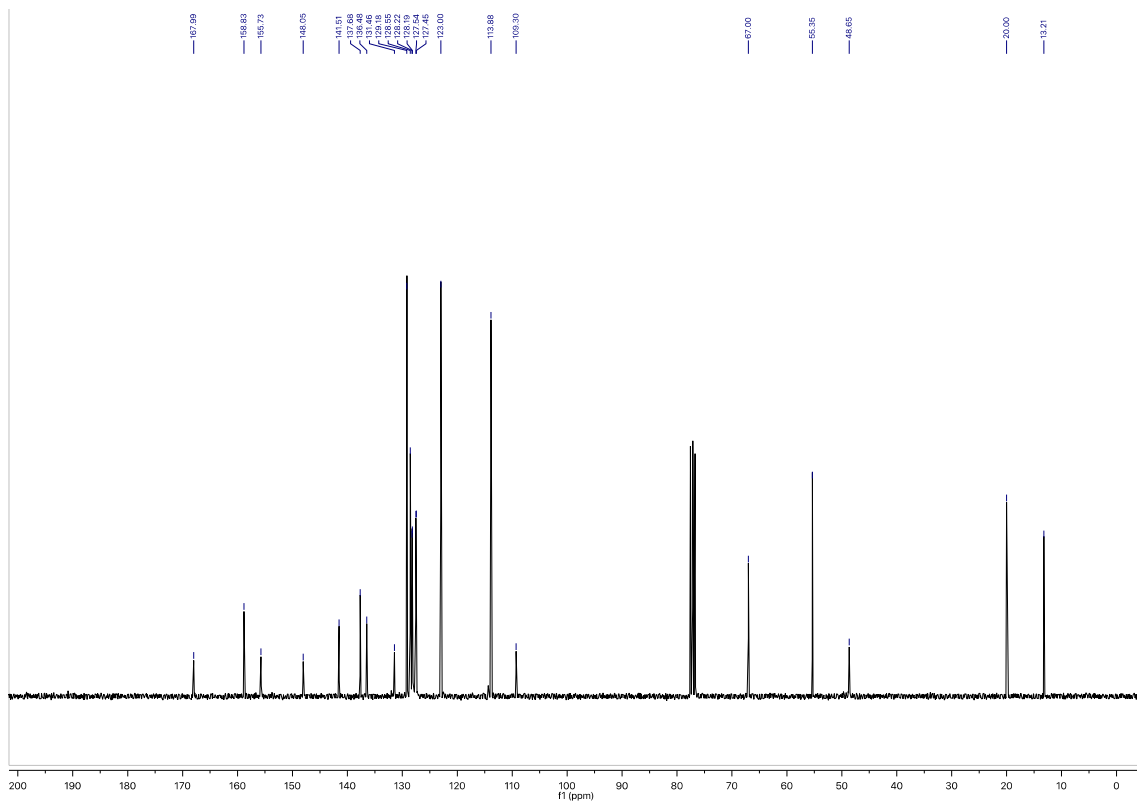

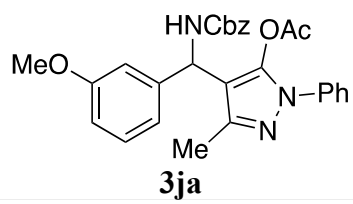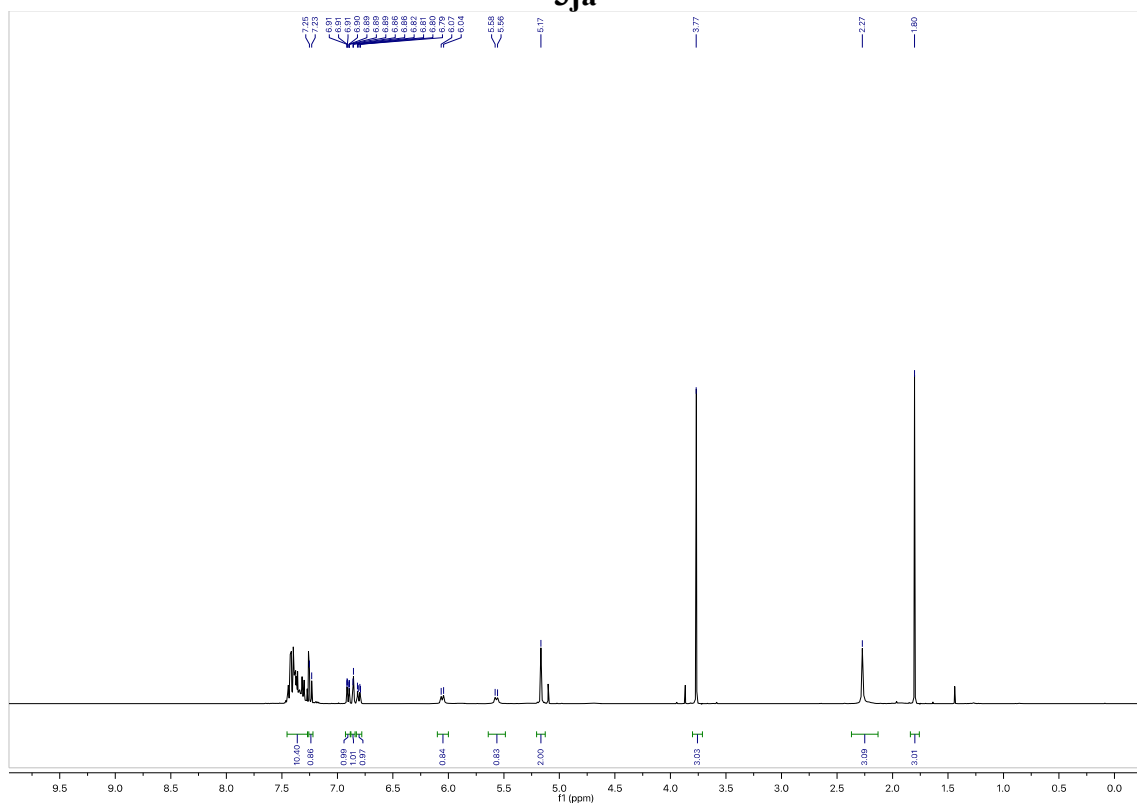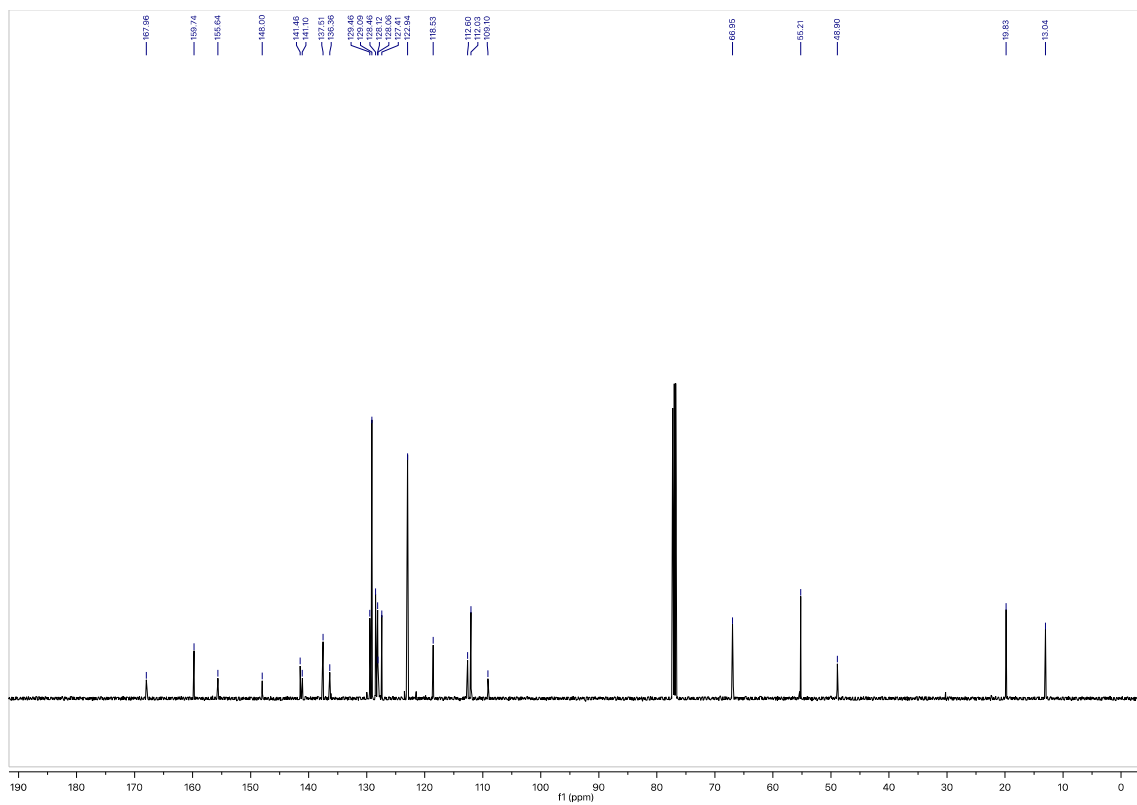



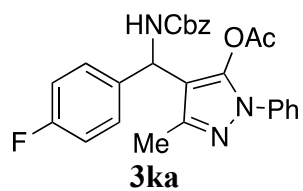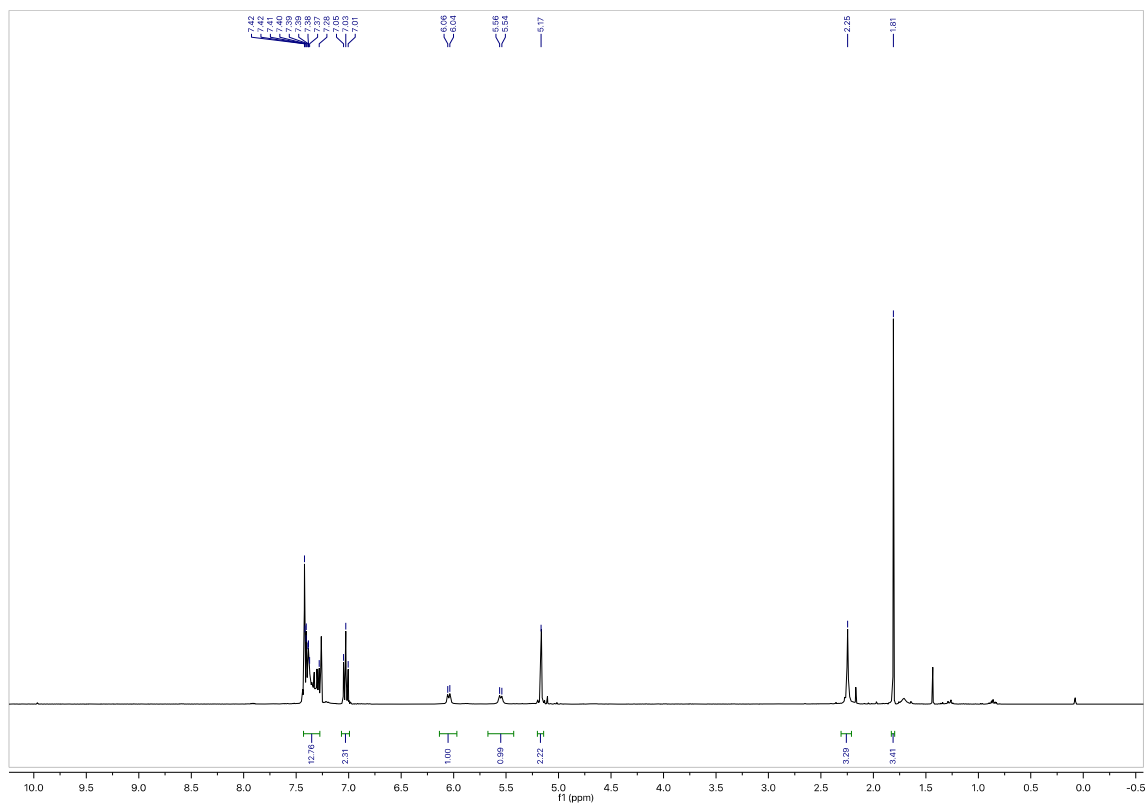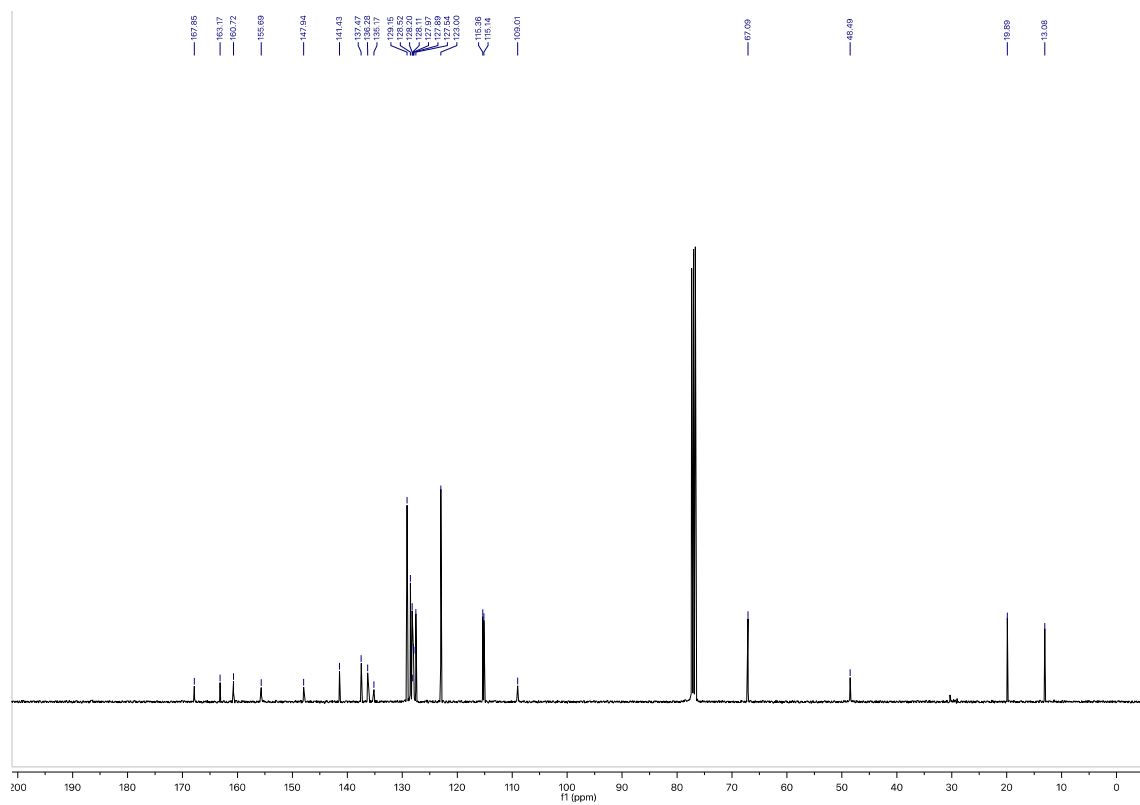

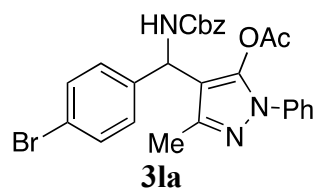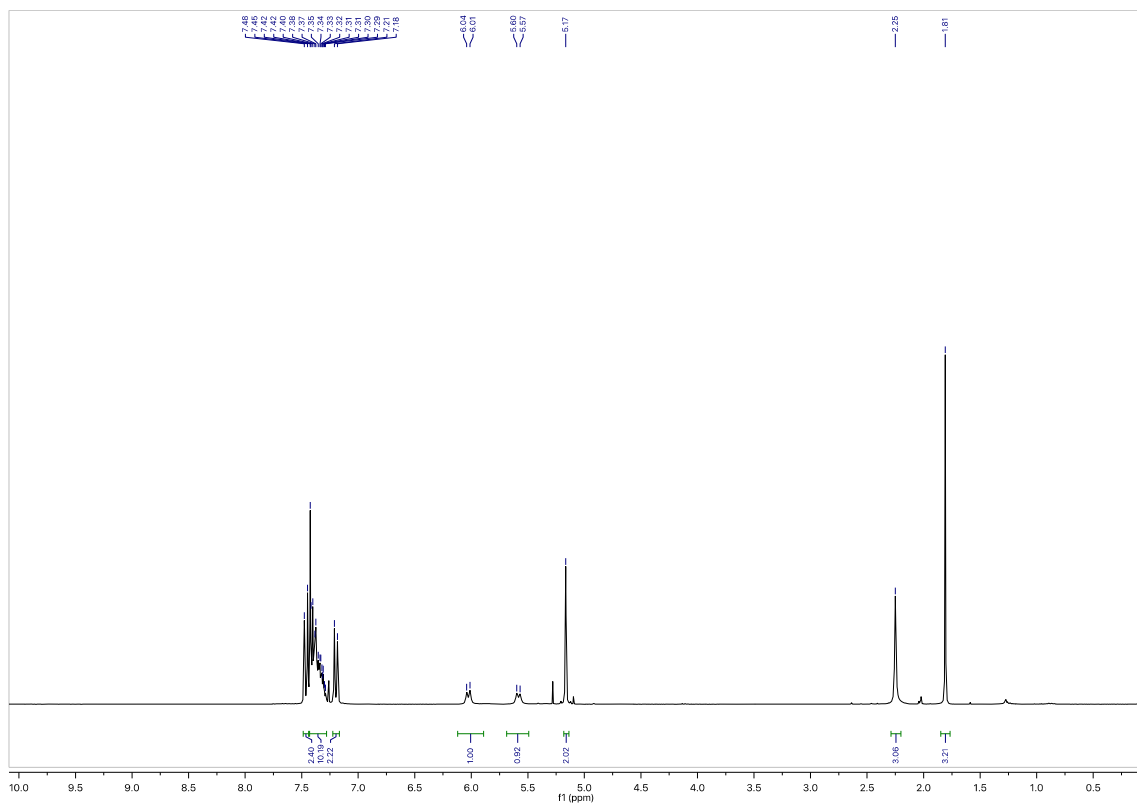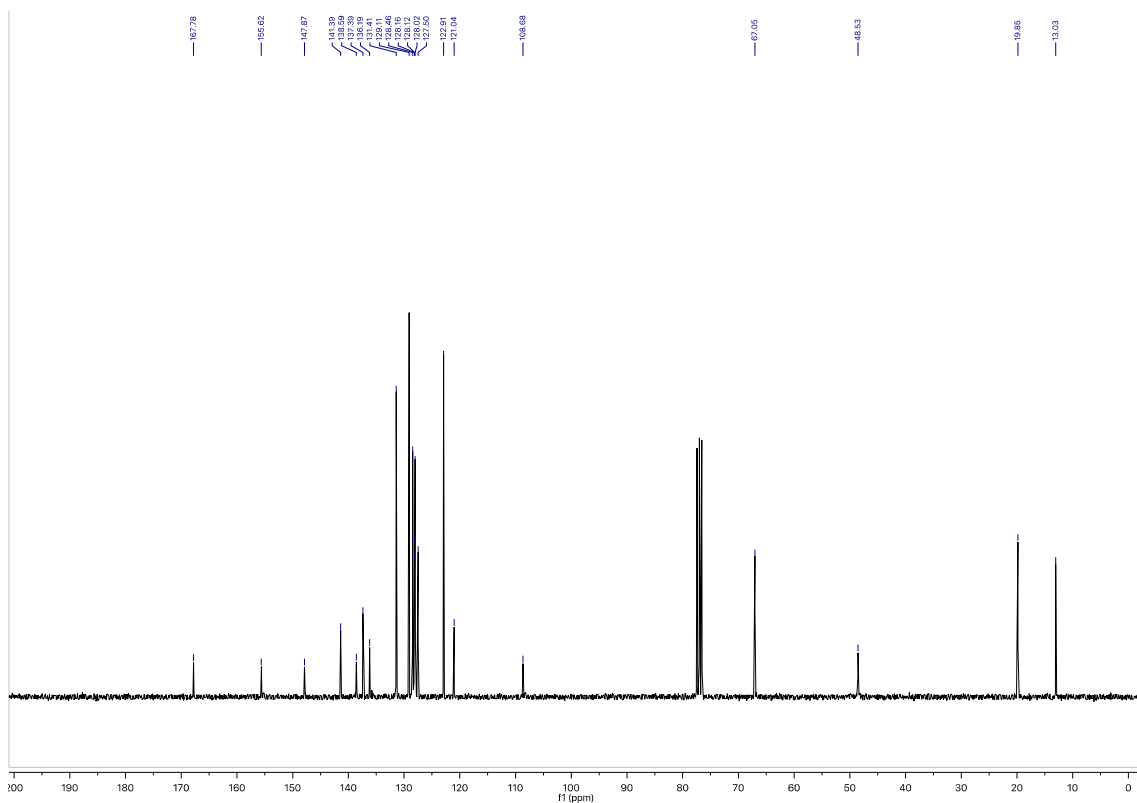

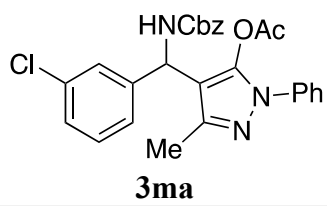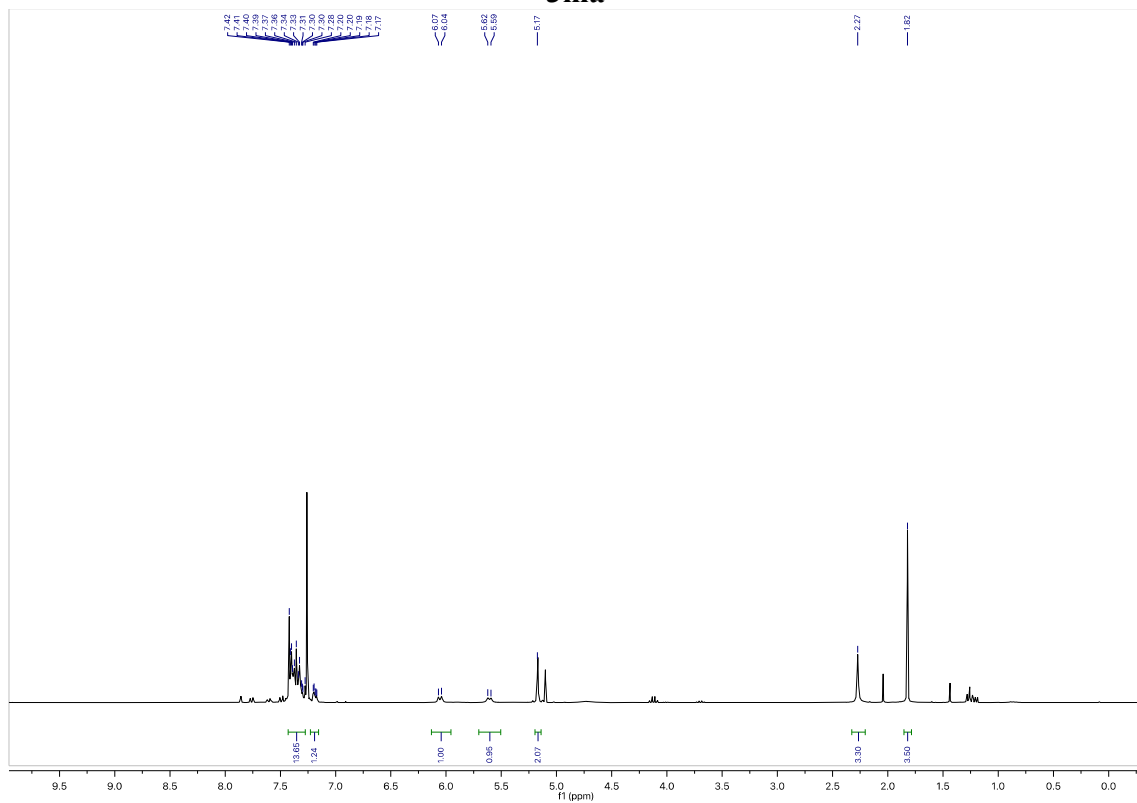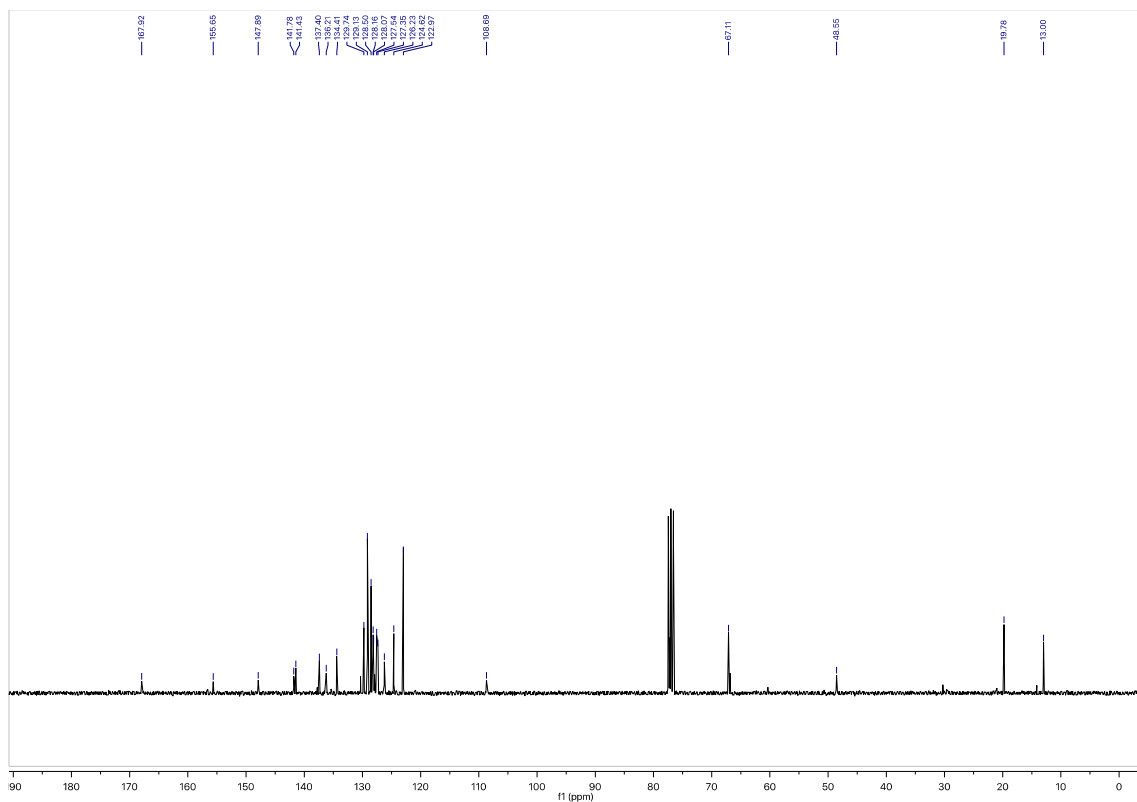

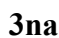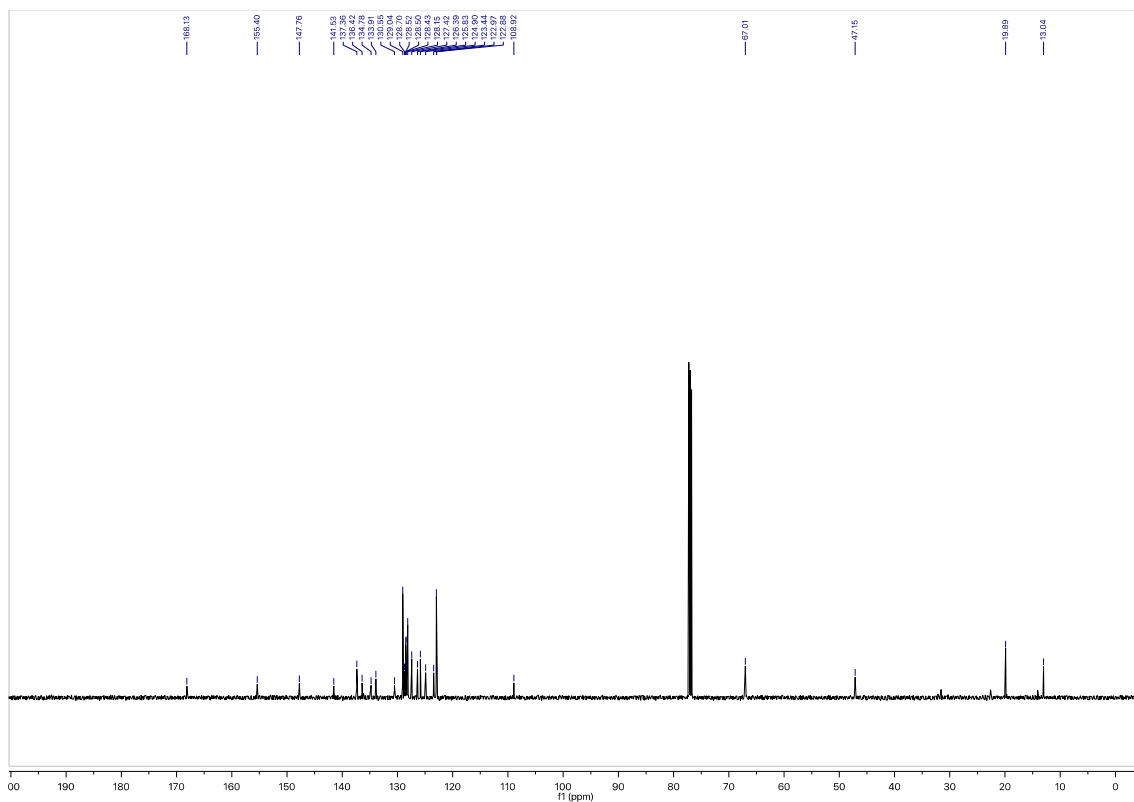

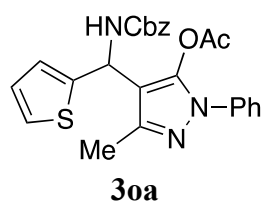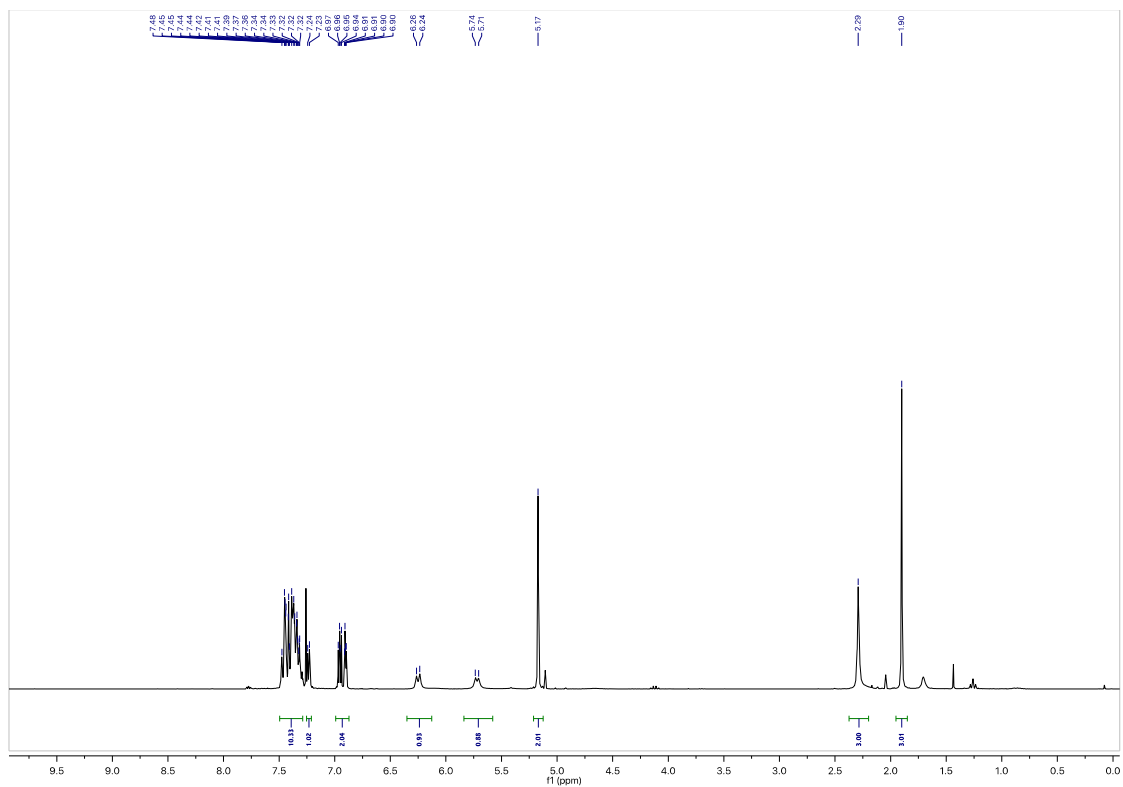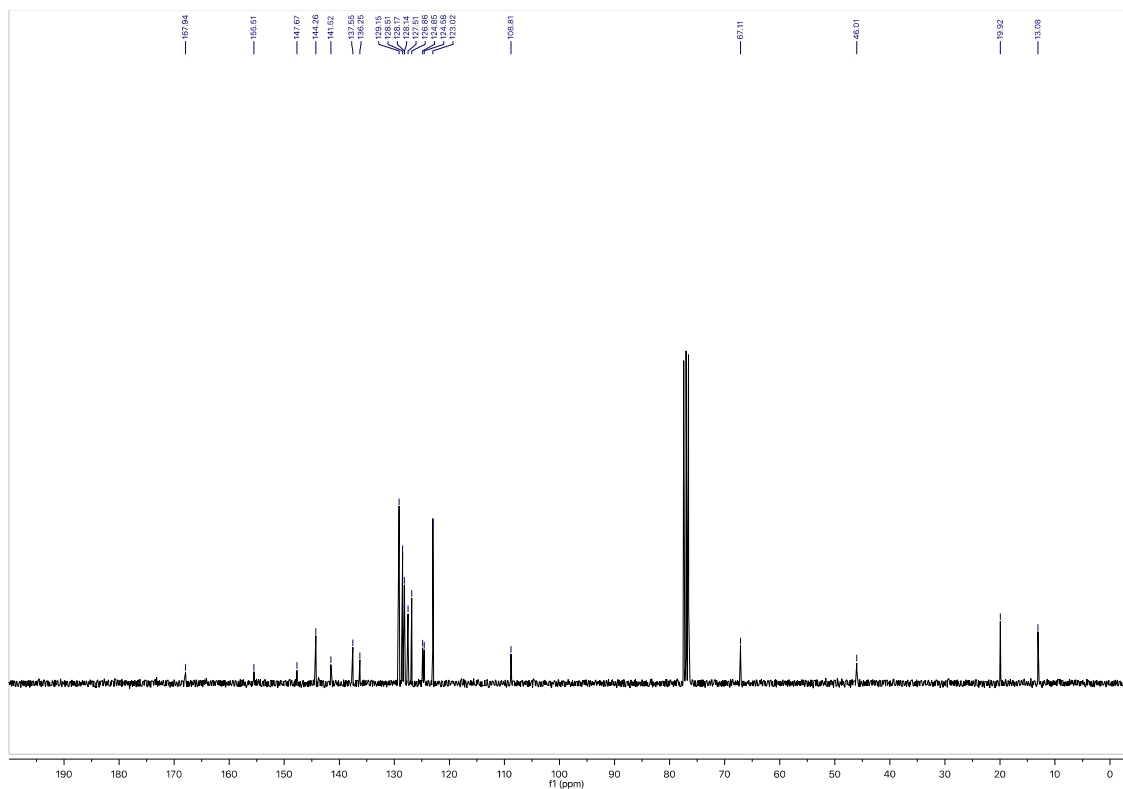

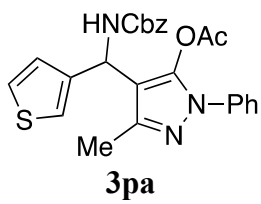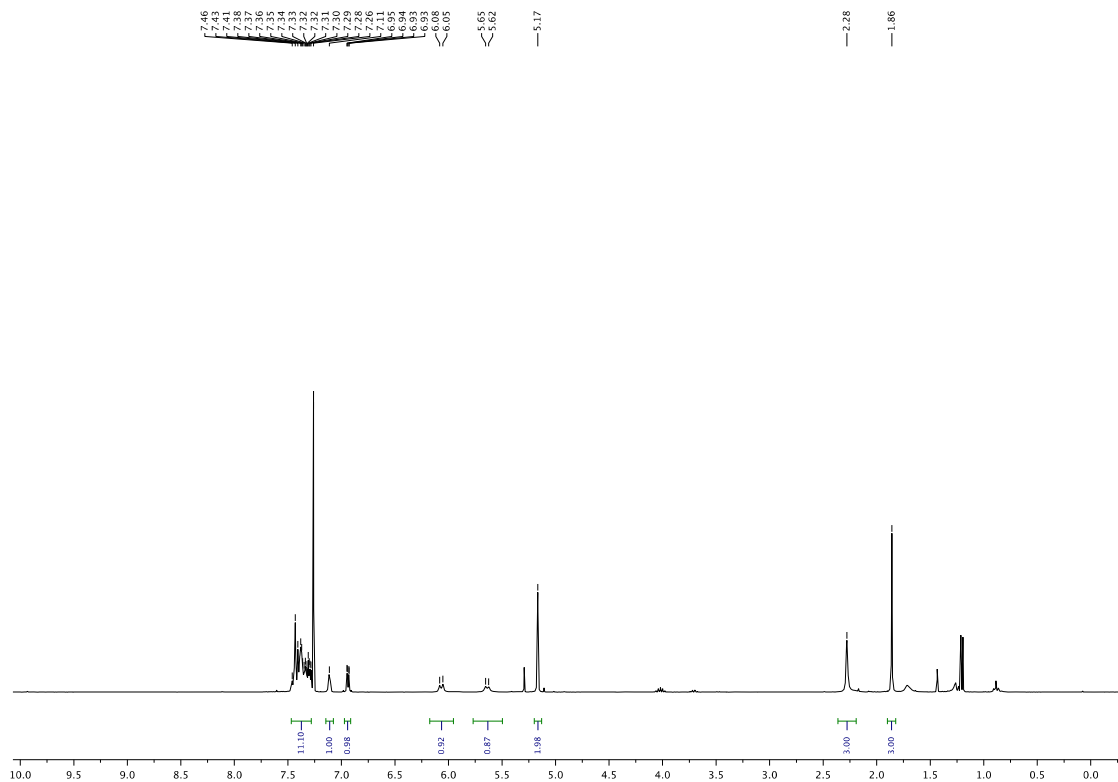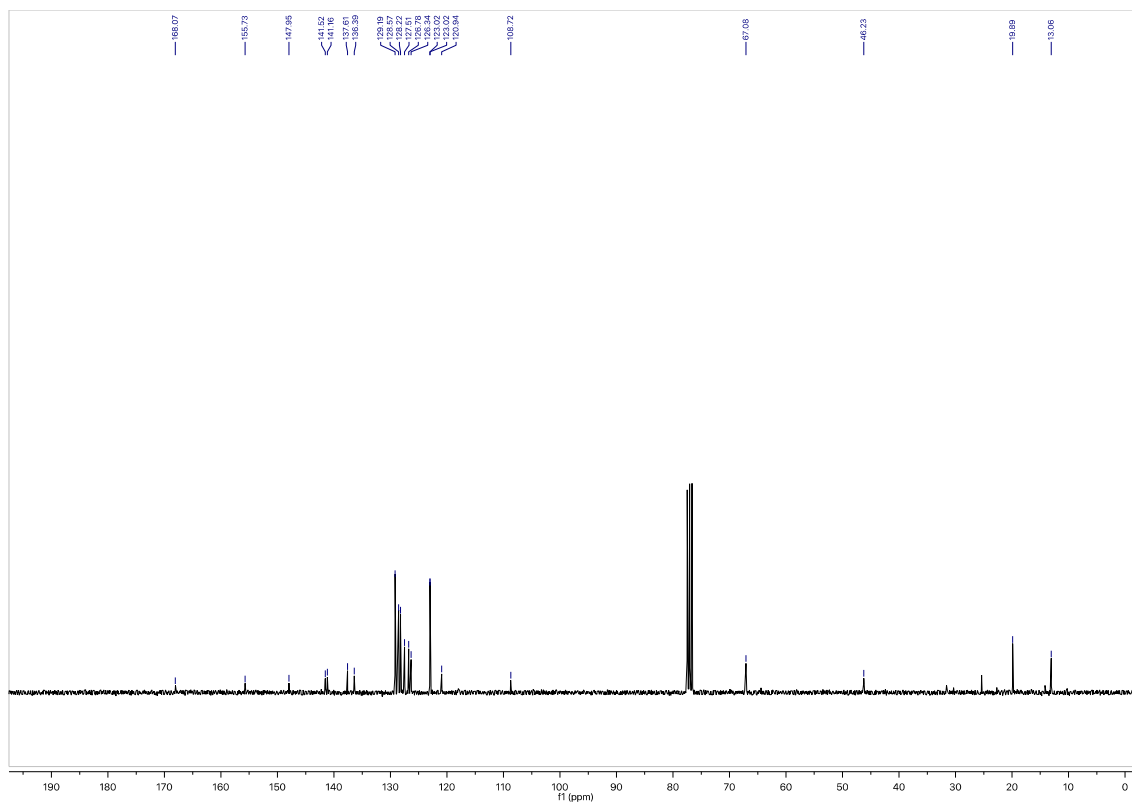

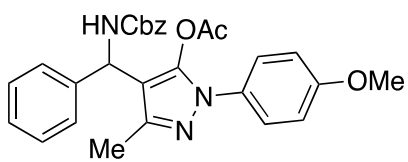

**3ab**

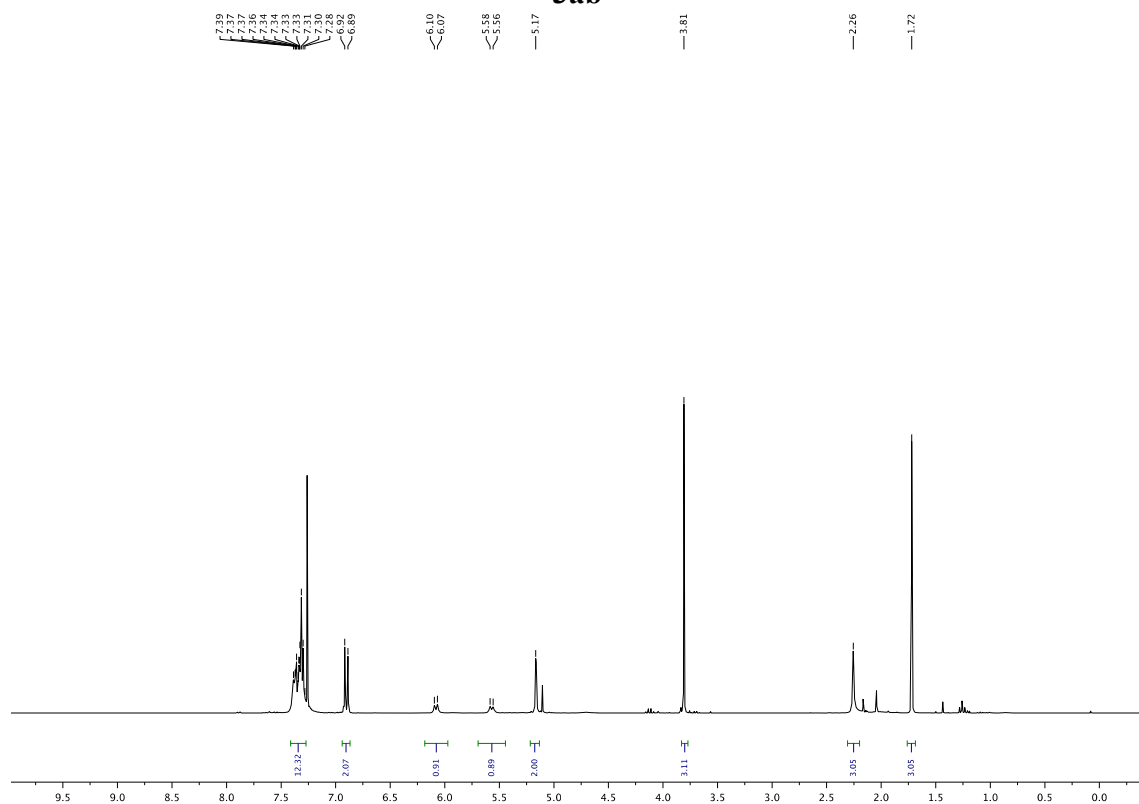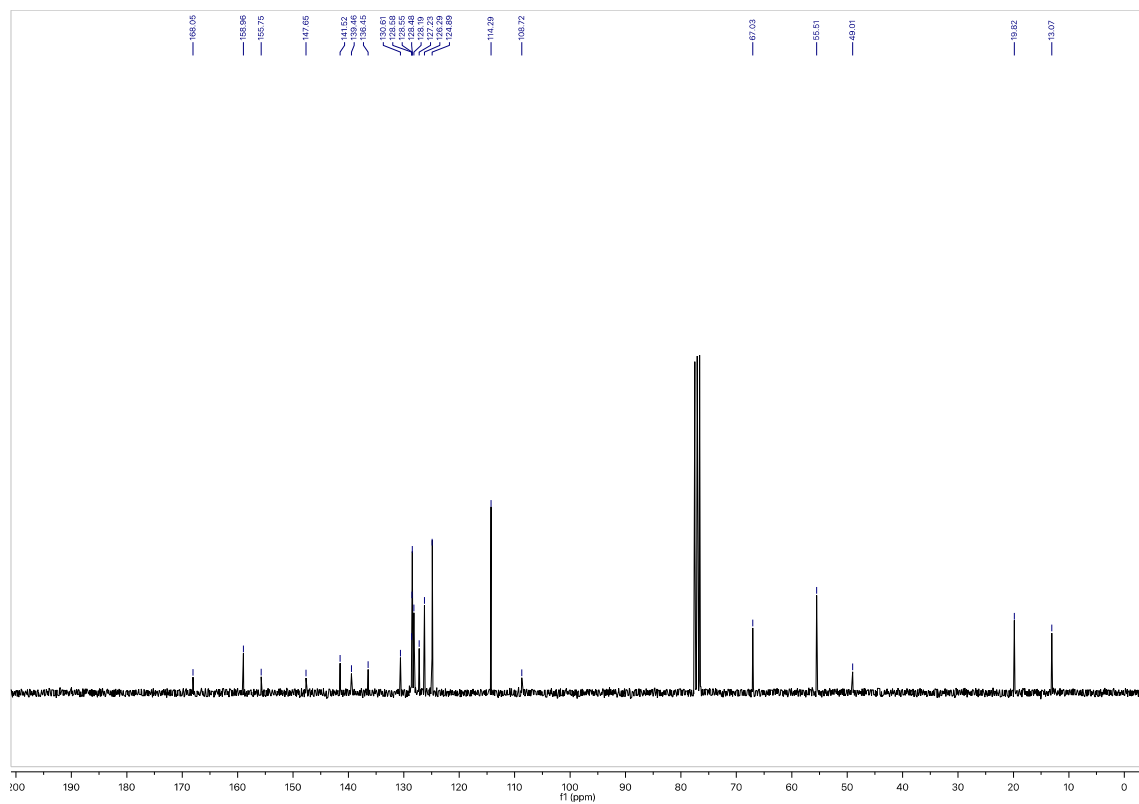

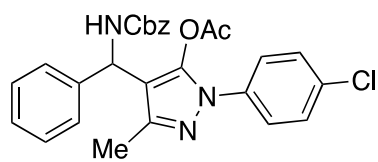

**3ac**

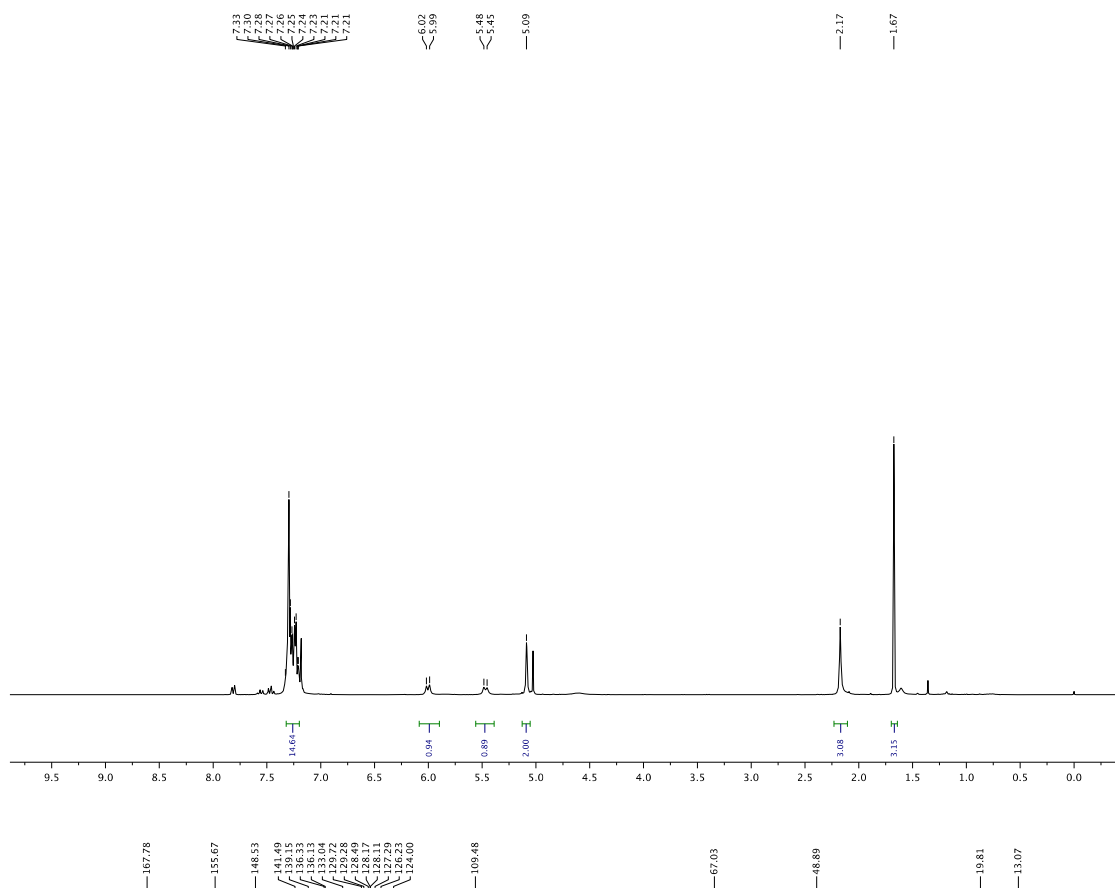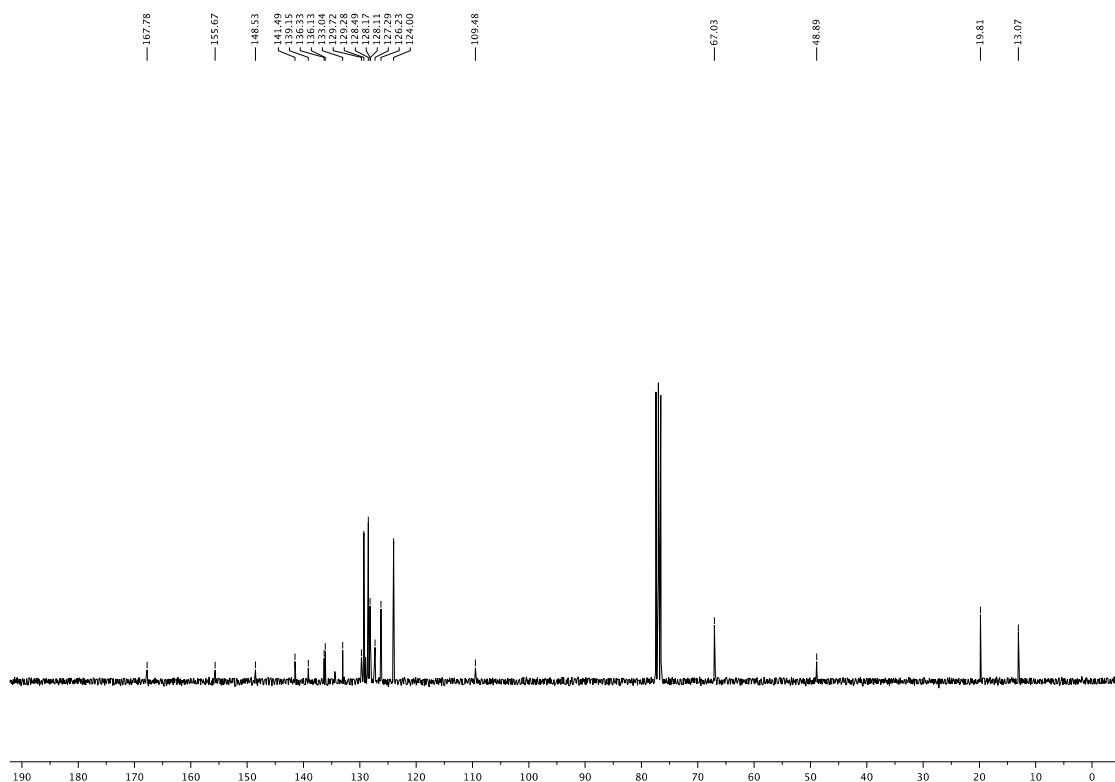



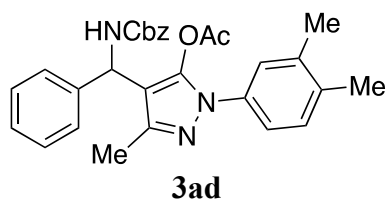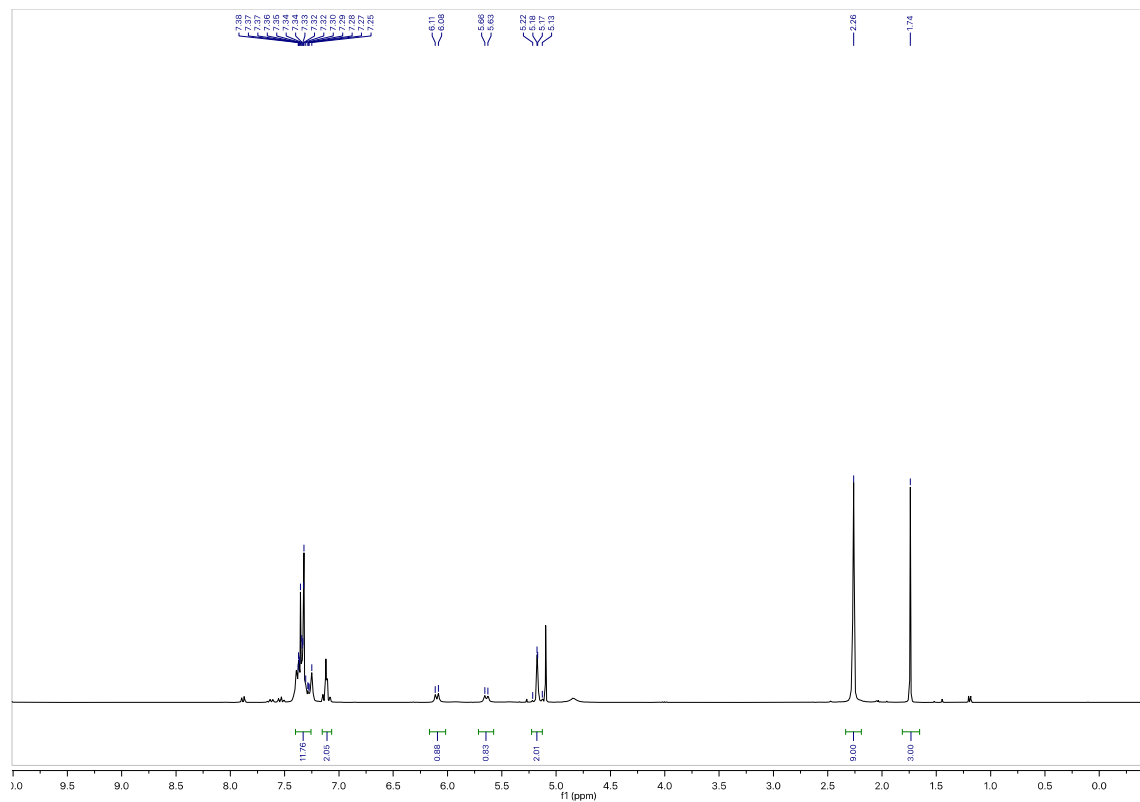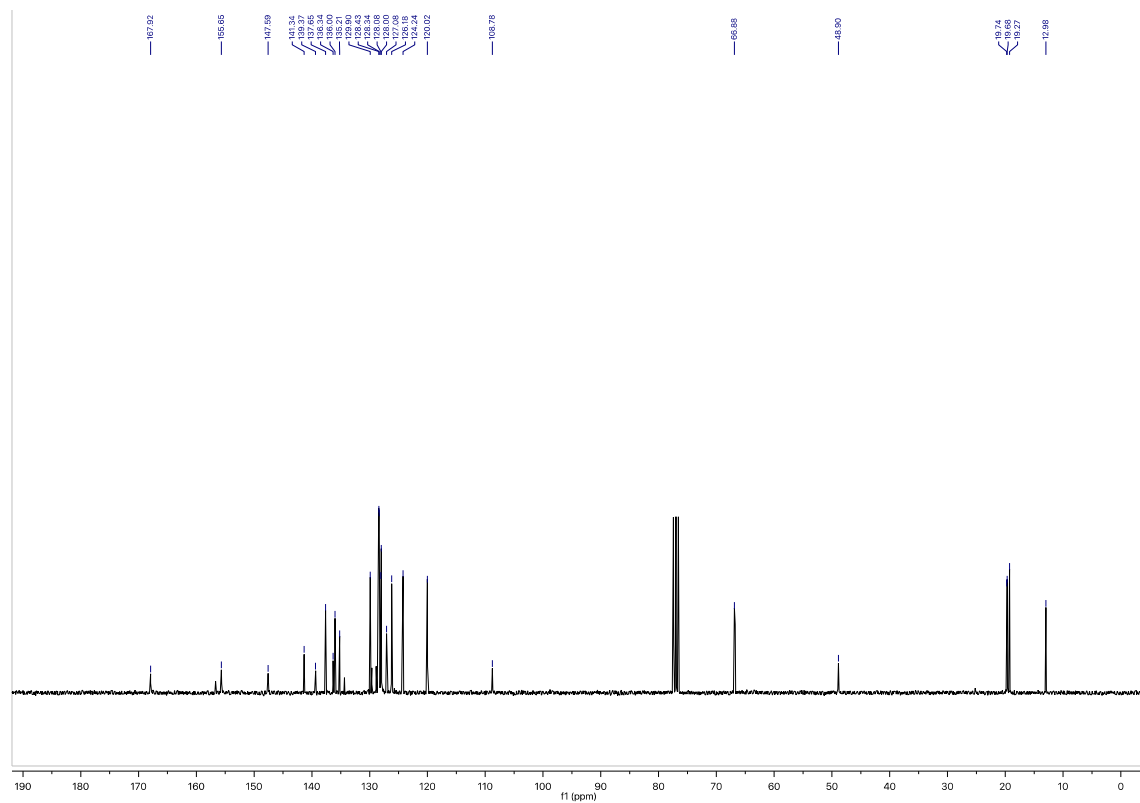

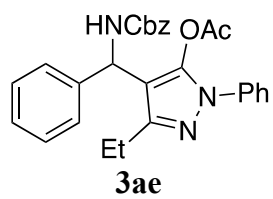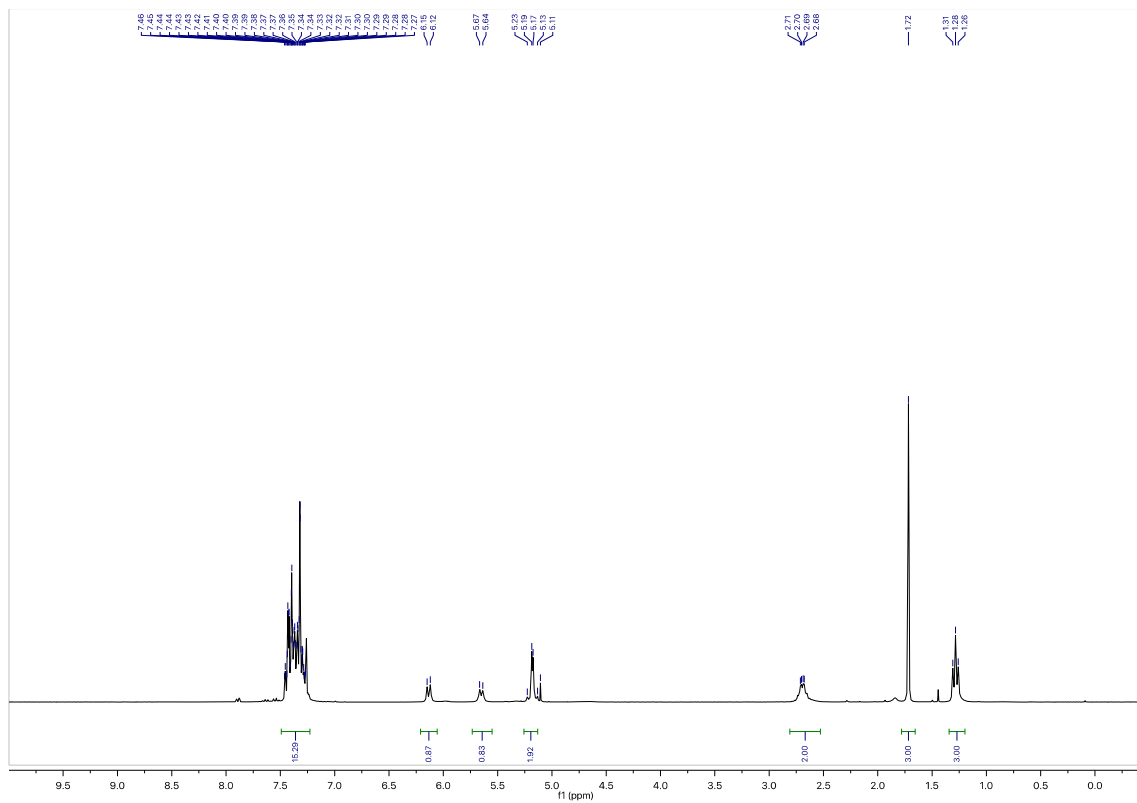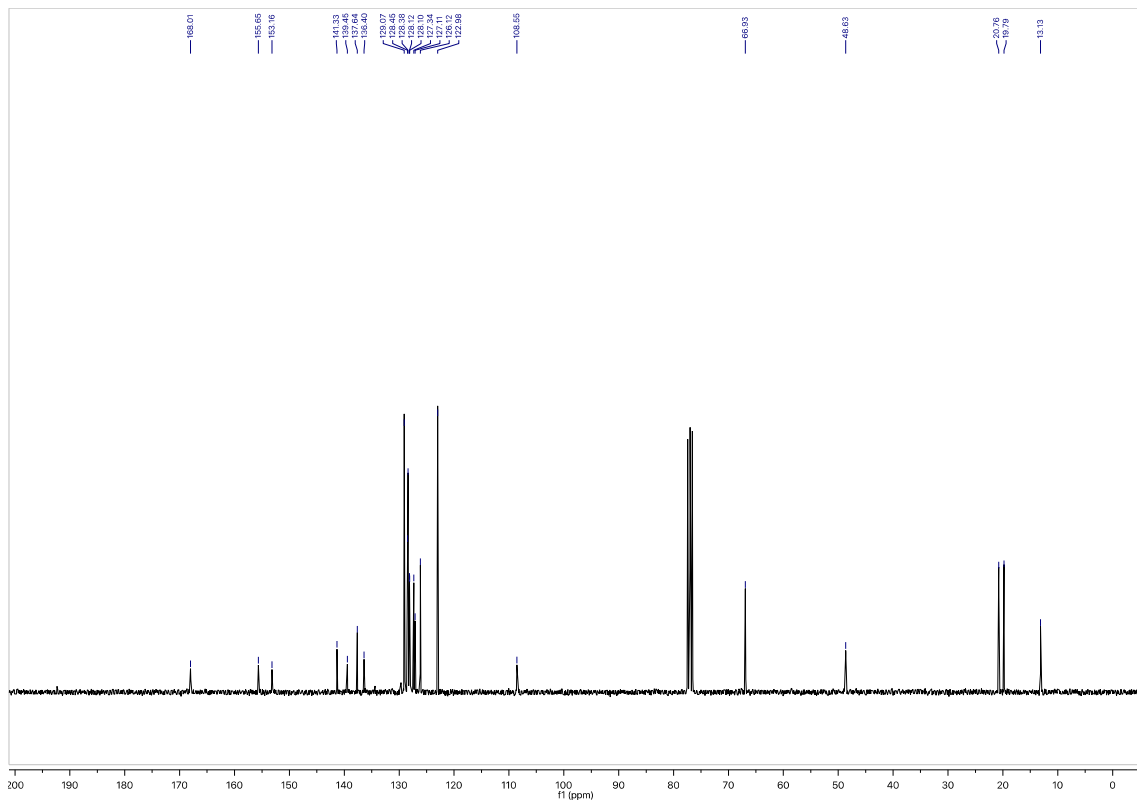

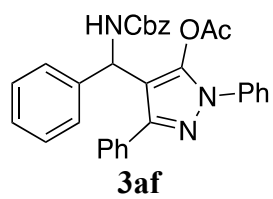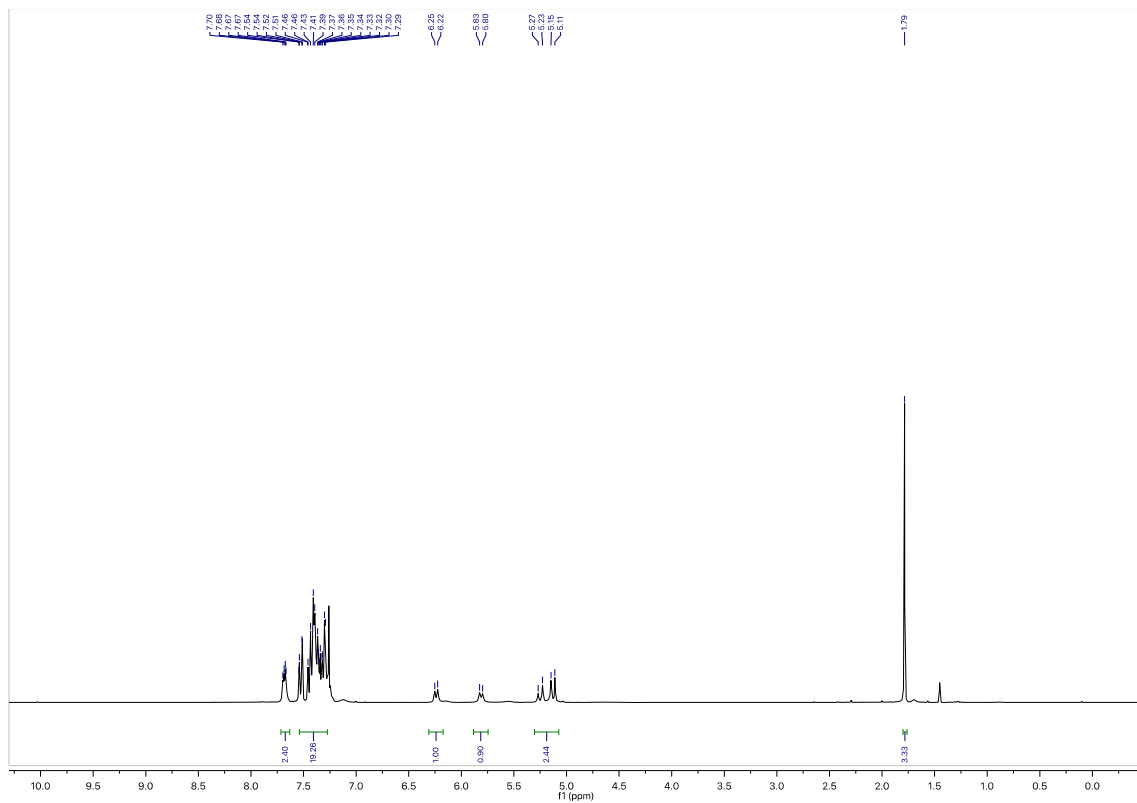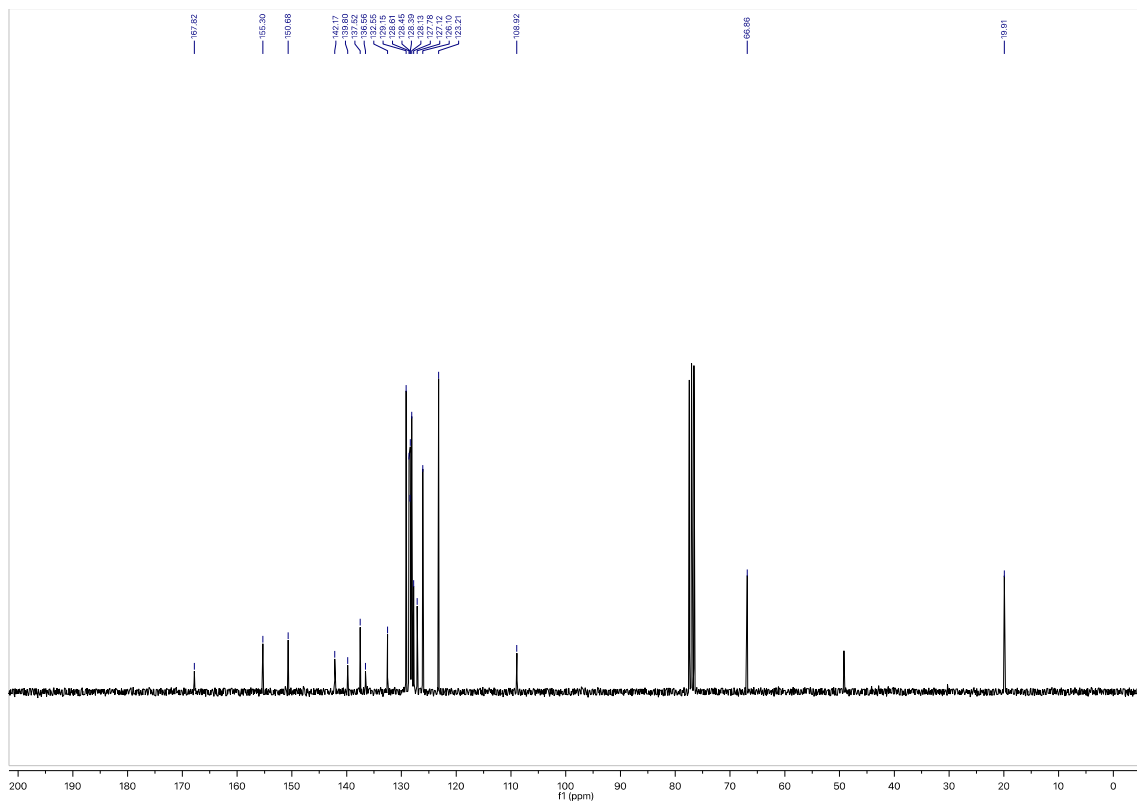

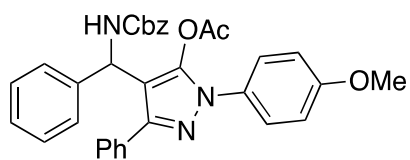

**3ag**

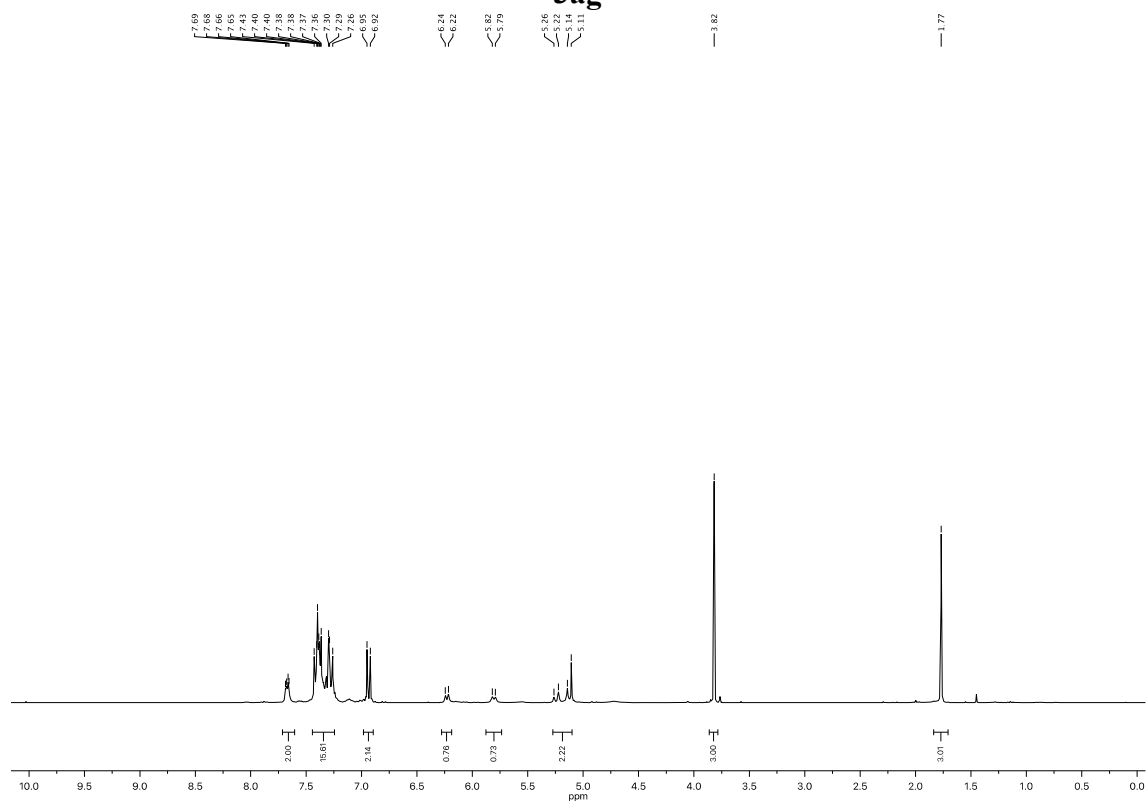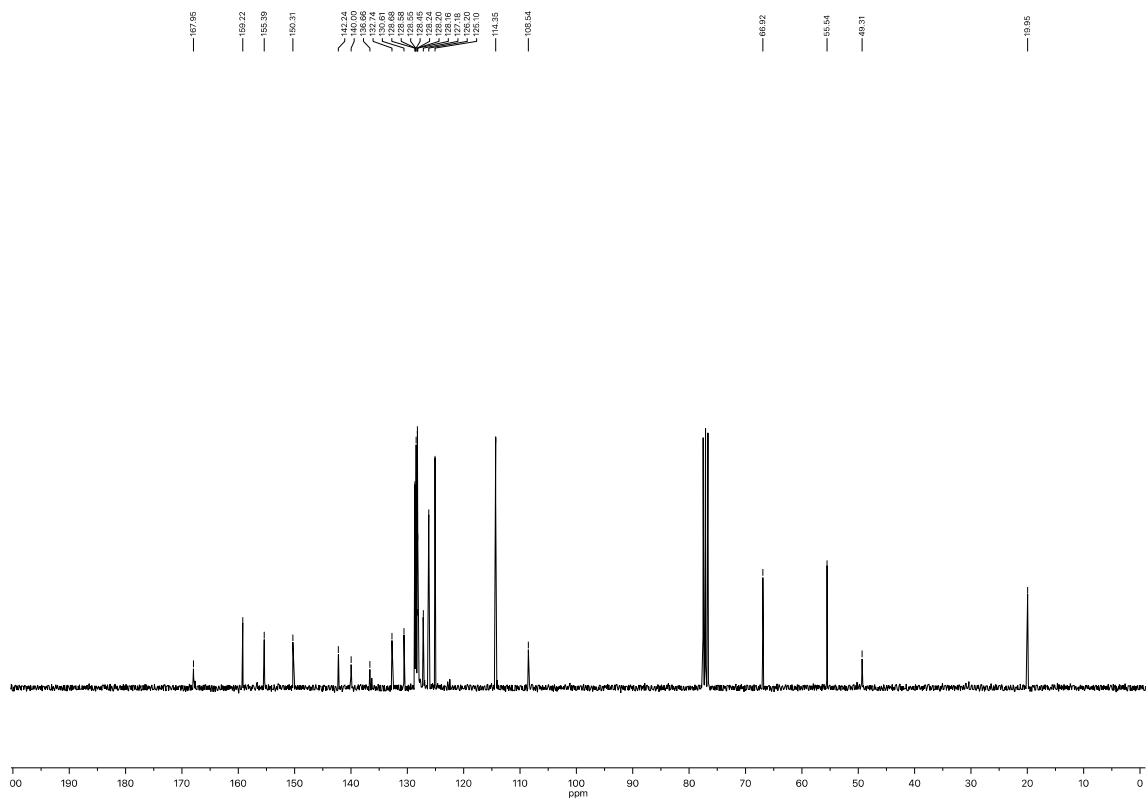

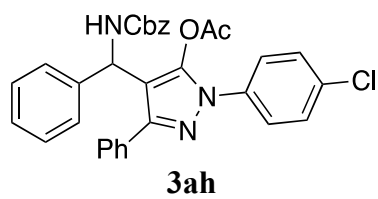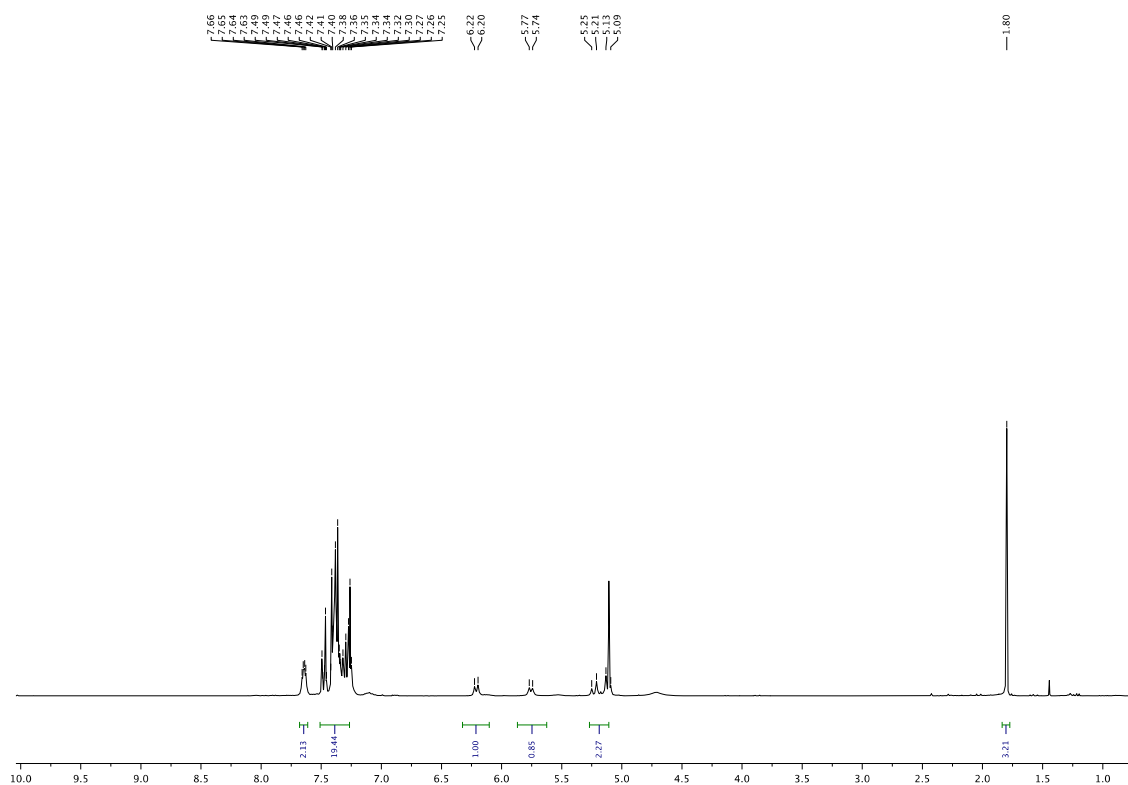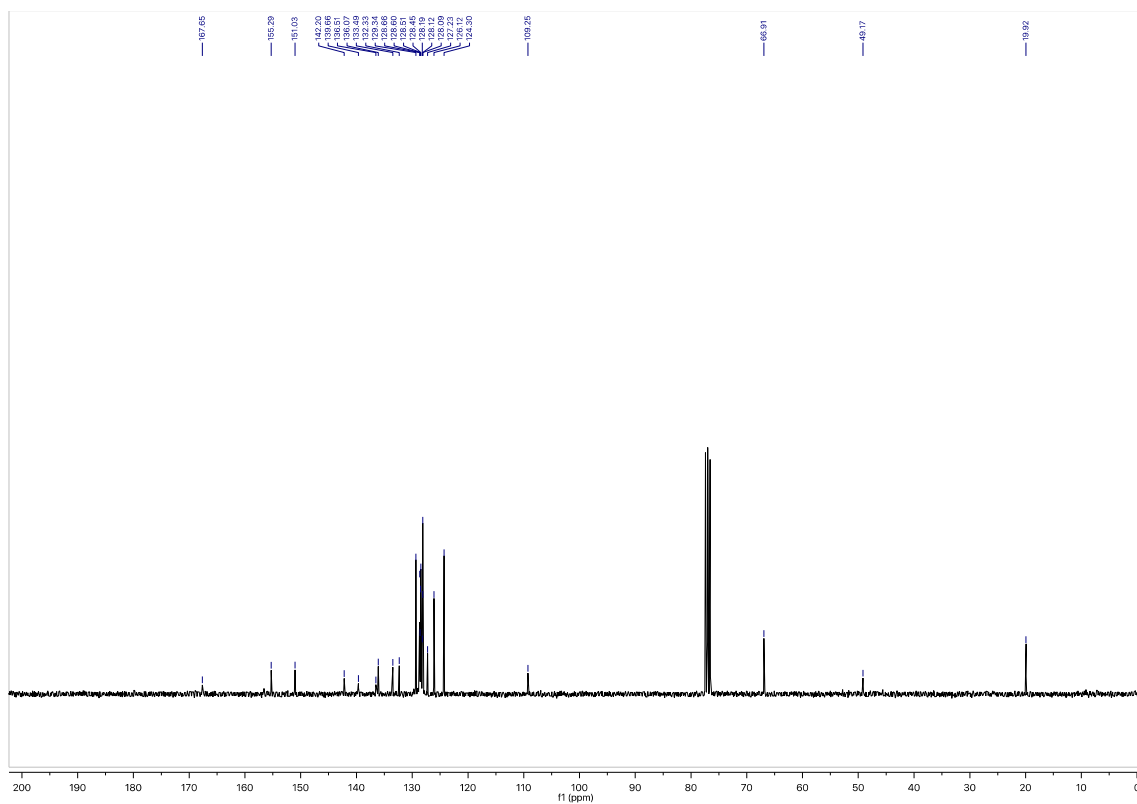

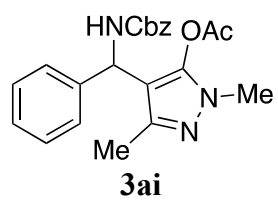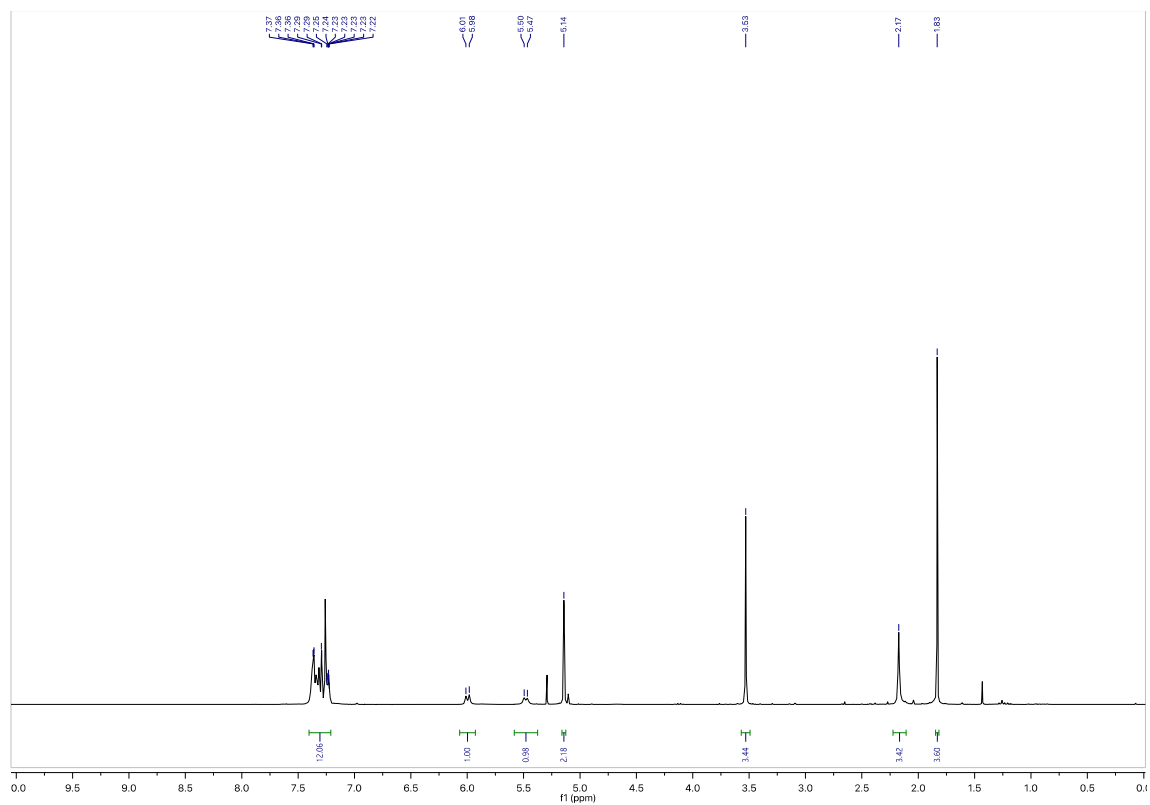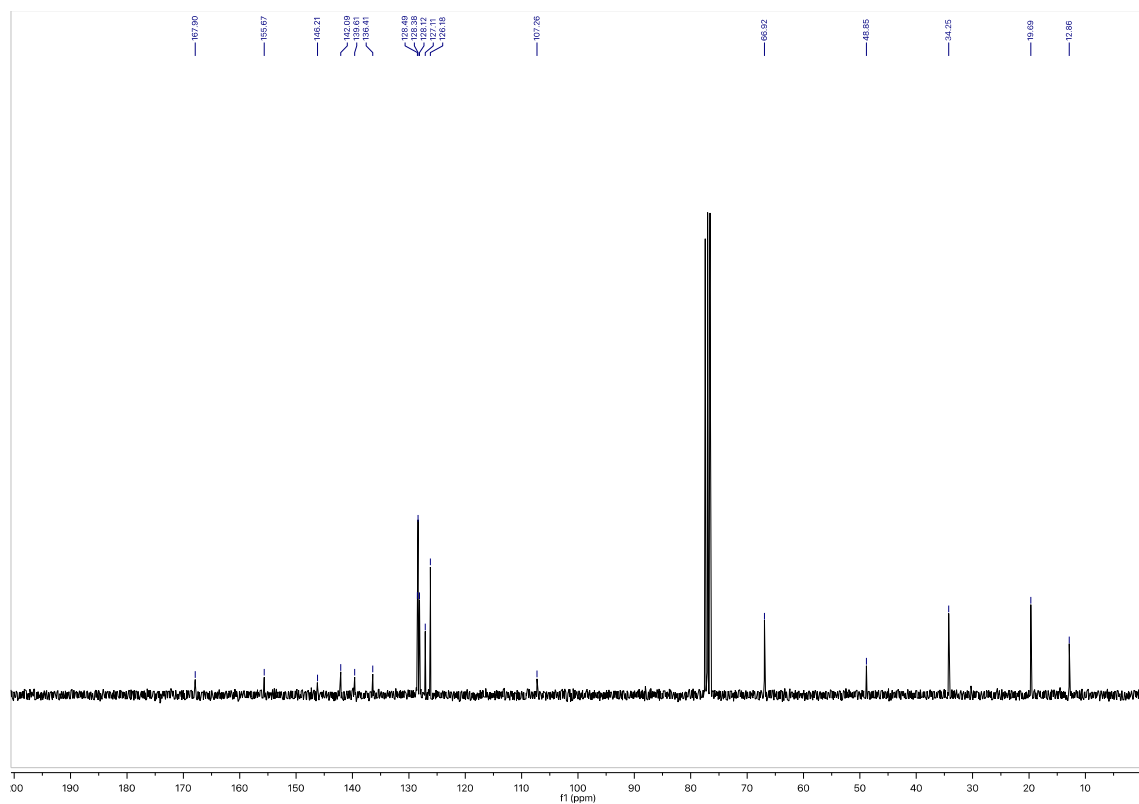

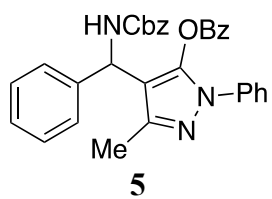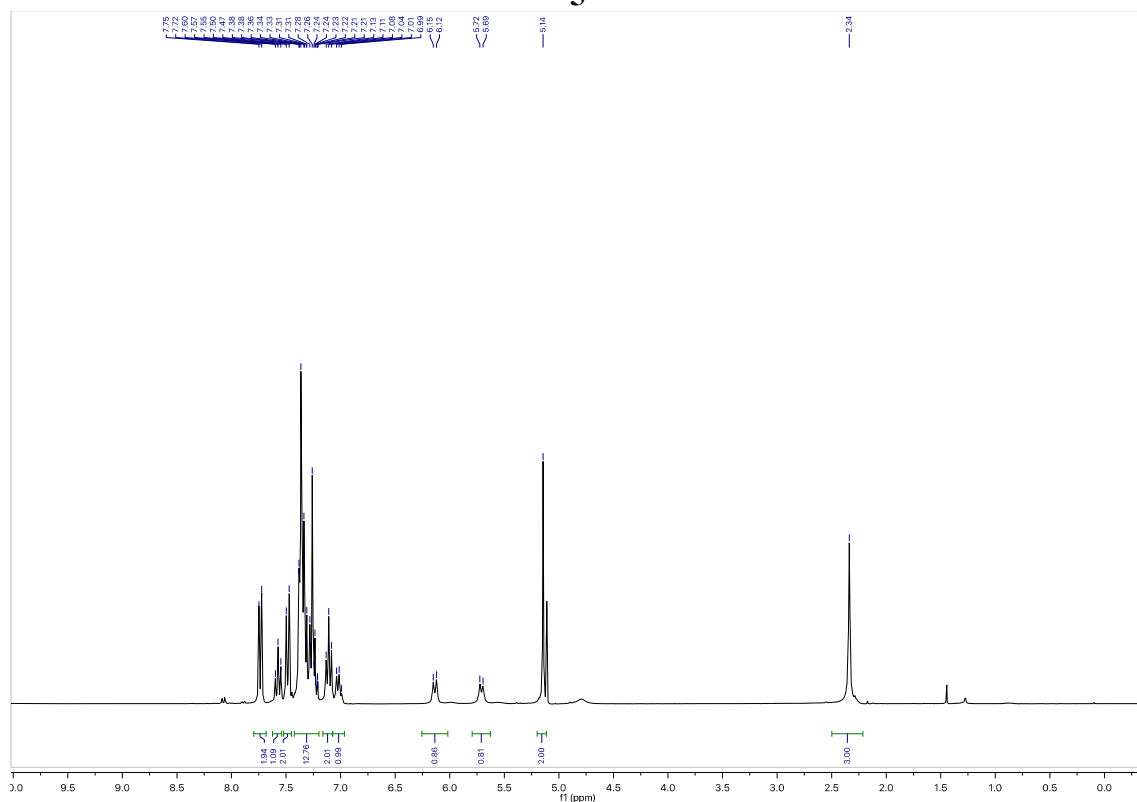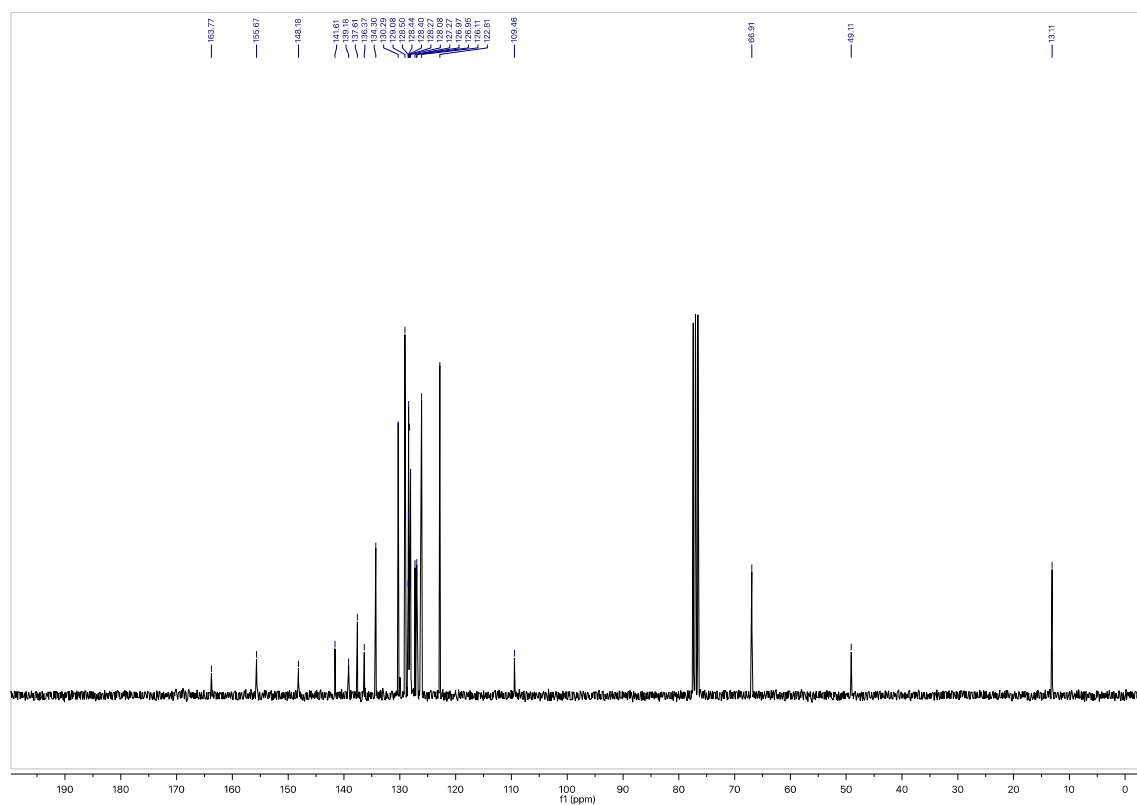

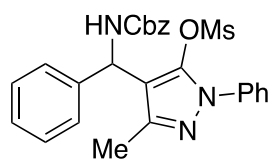

**6**

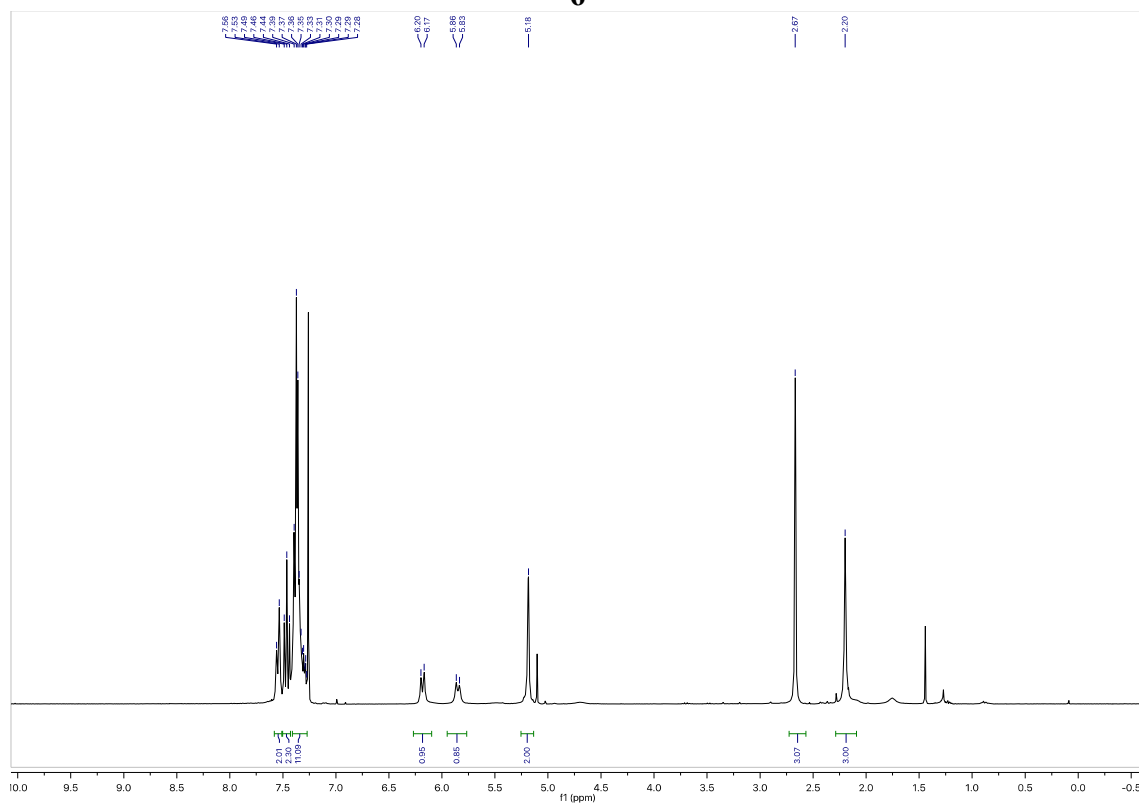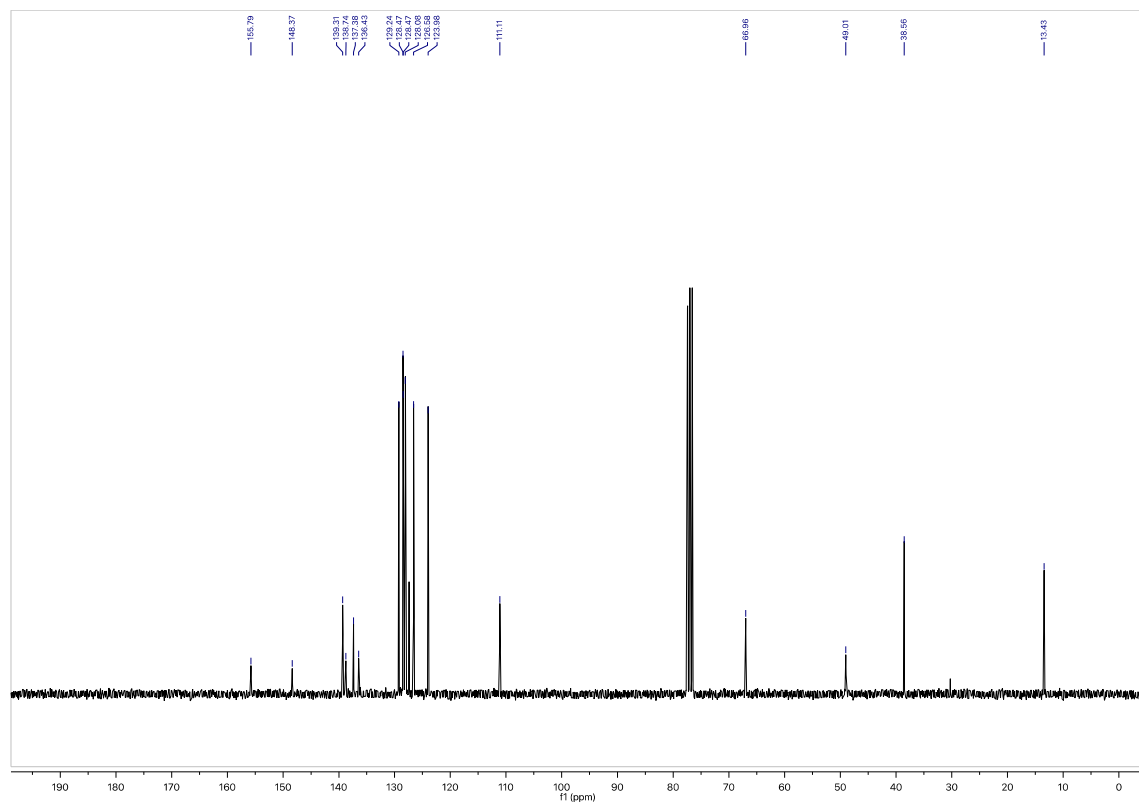



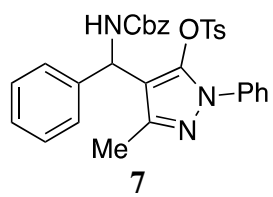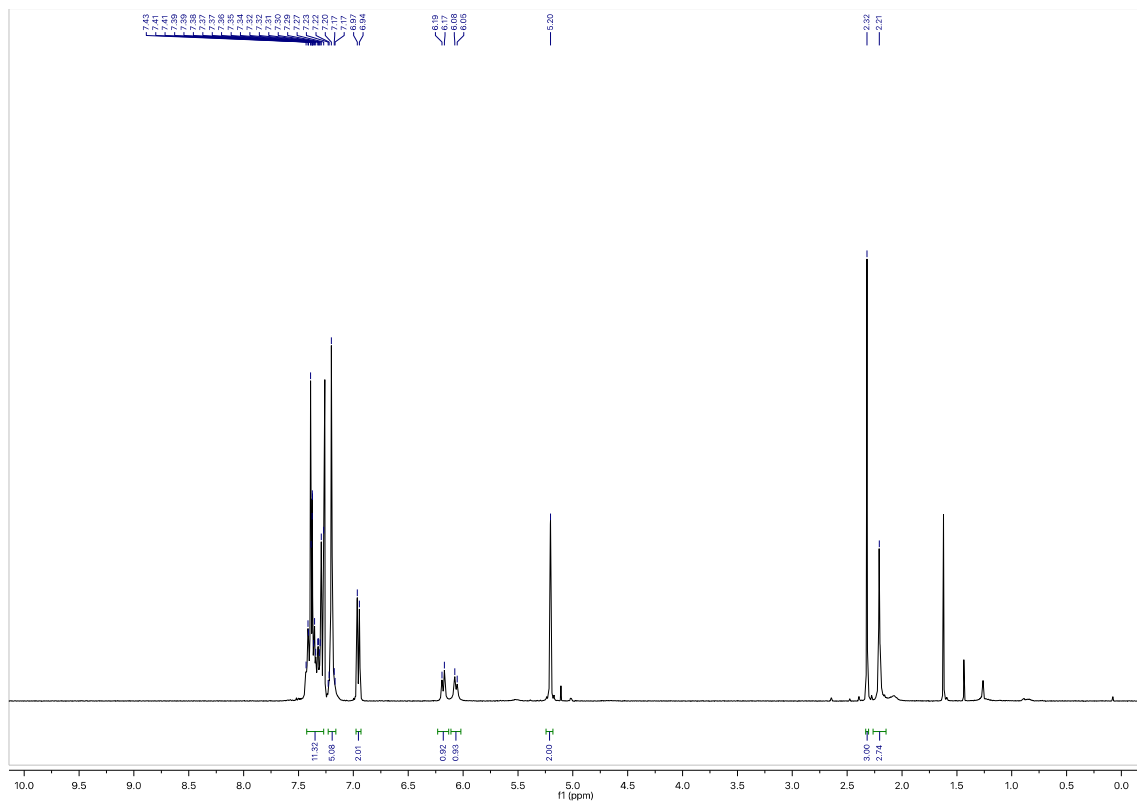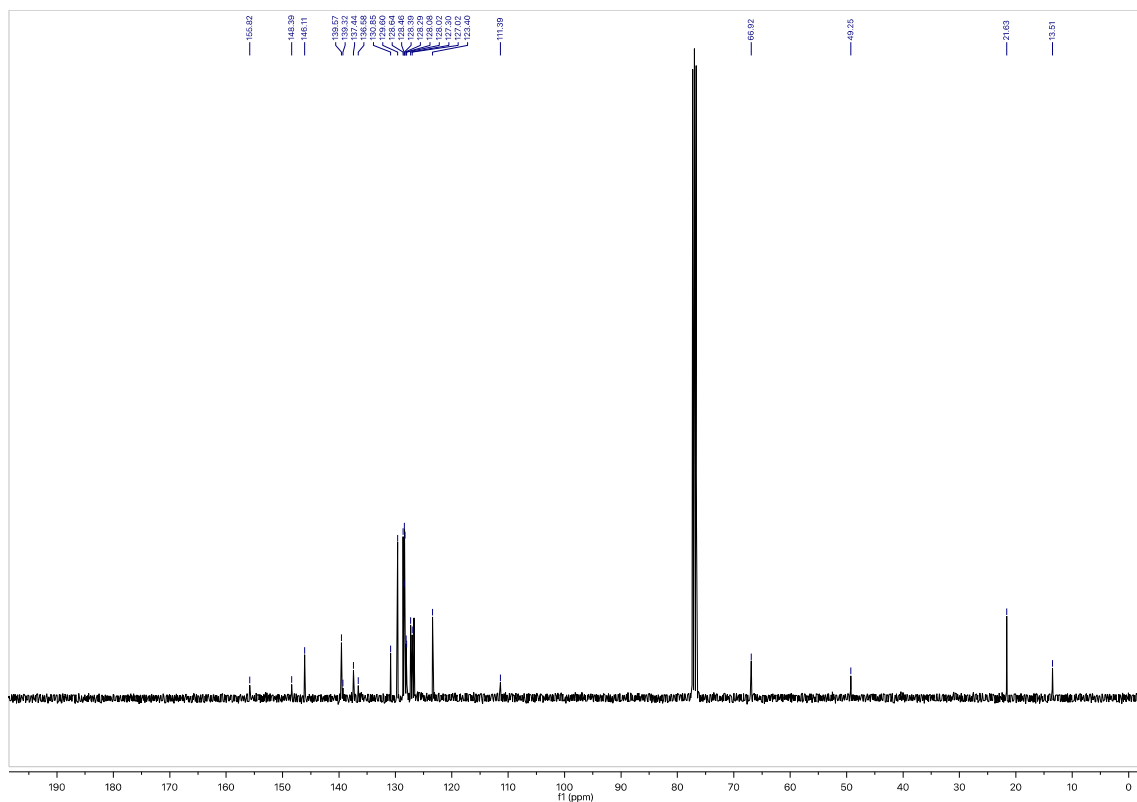

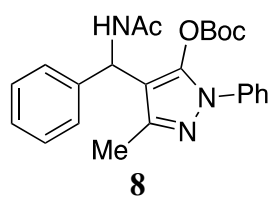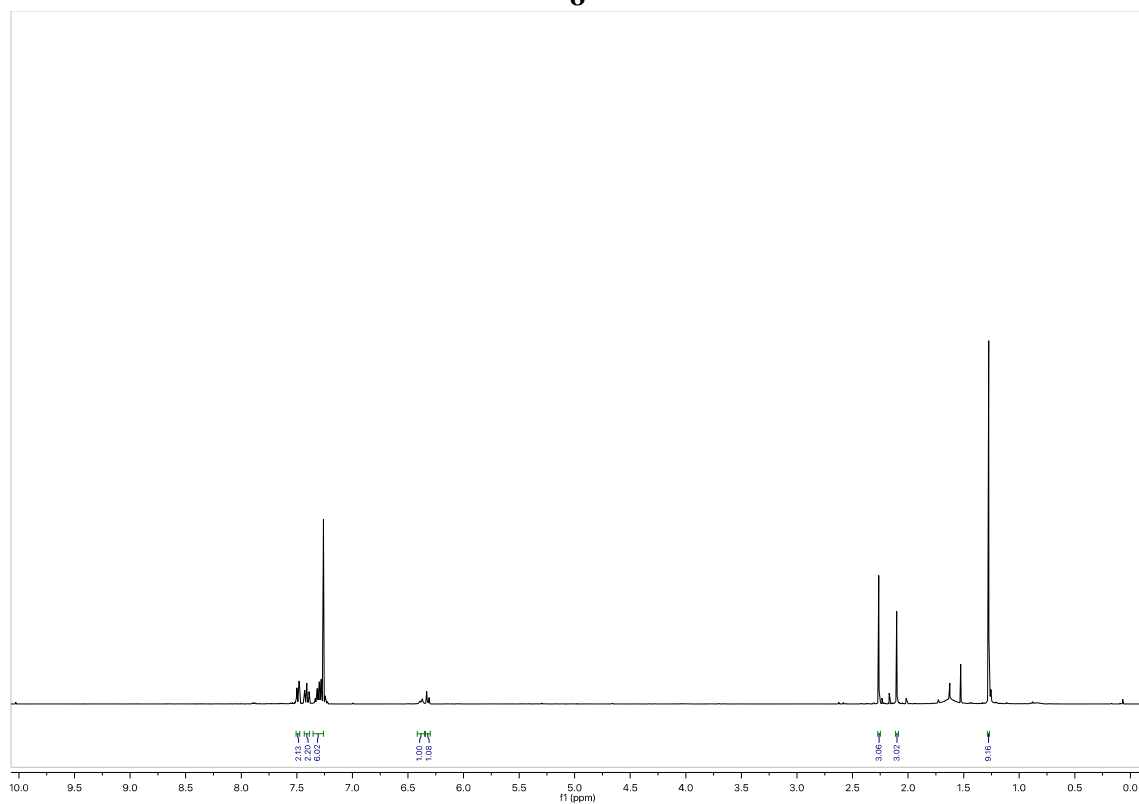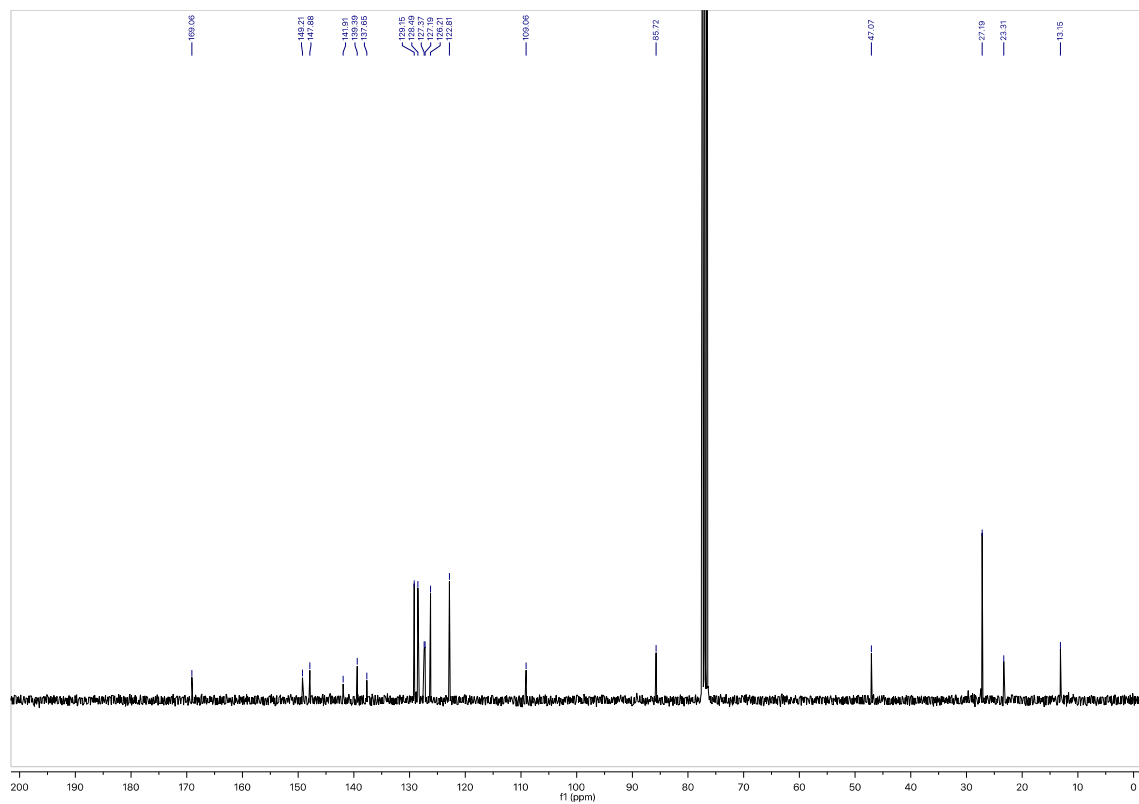

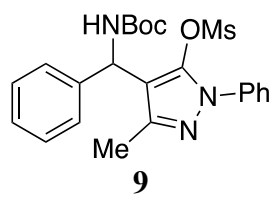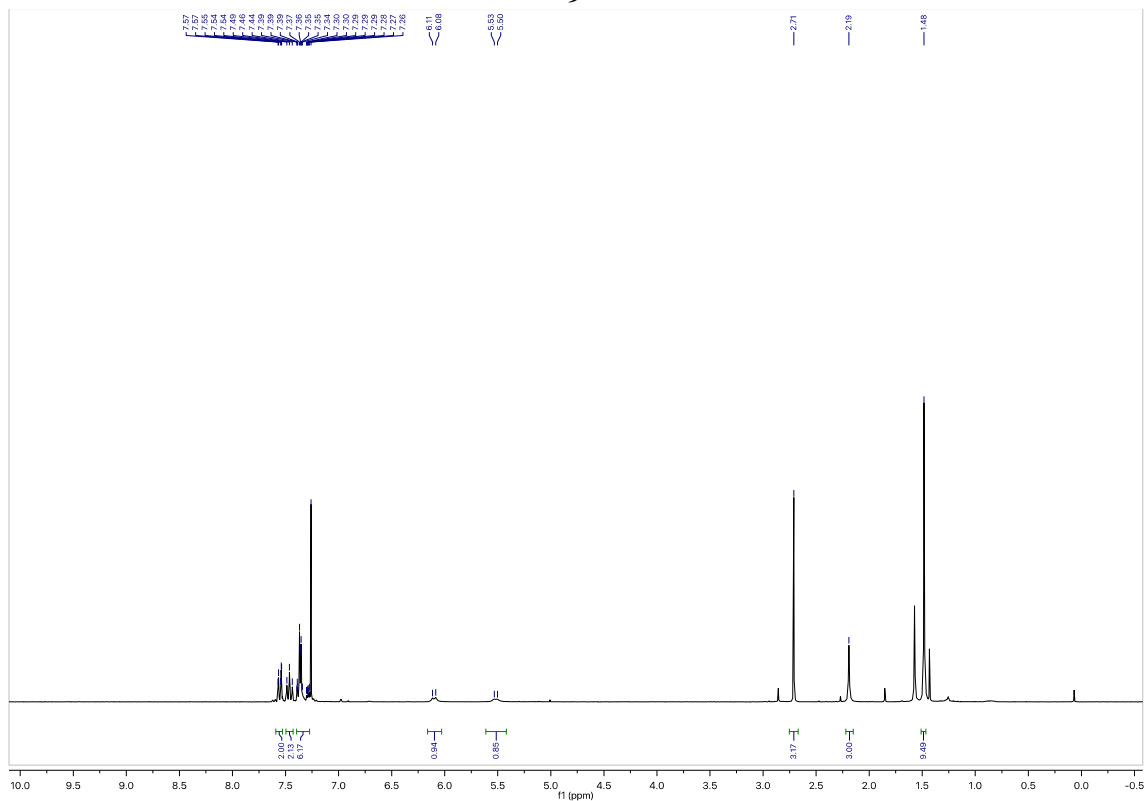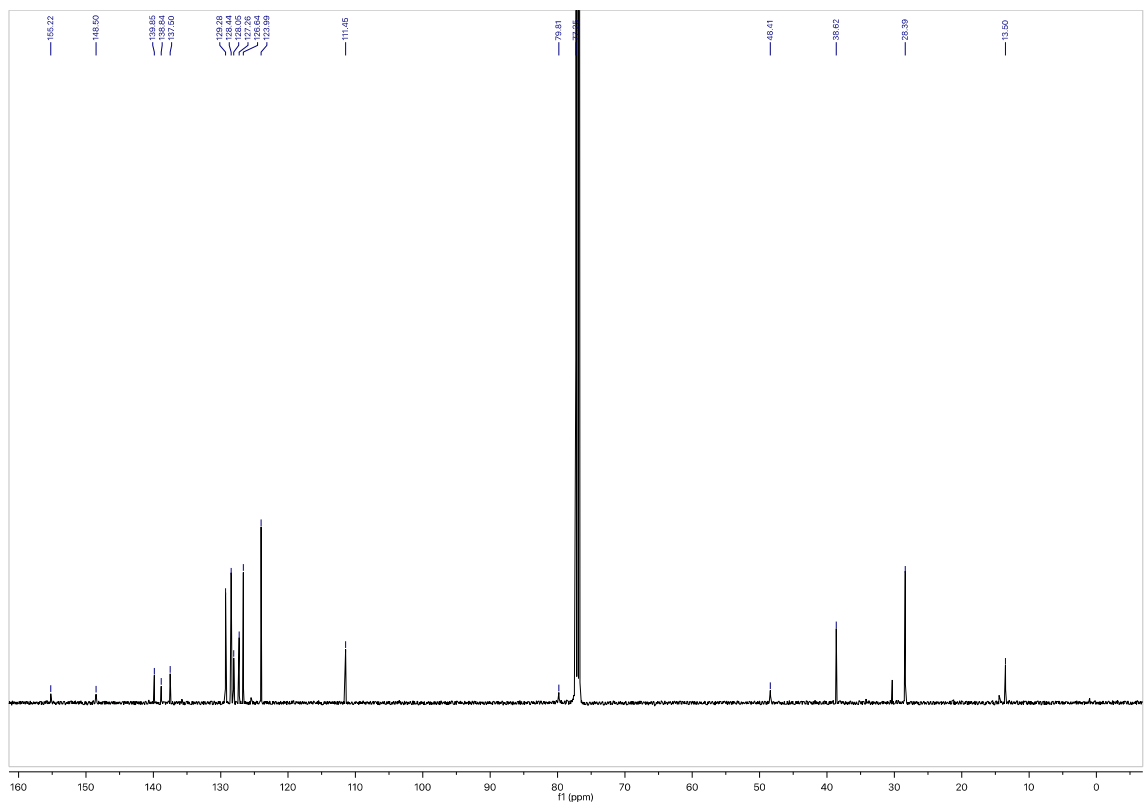

HPLC CHROMATOGRAMS

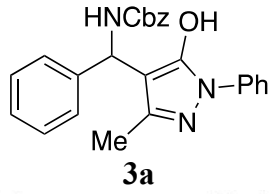

Sample Name: CV-509 IC 8020 1mL

Vial Number: 1

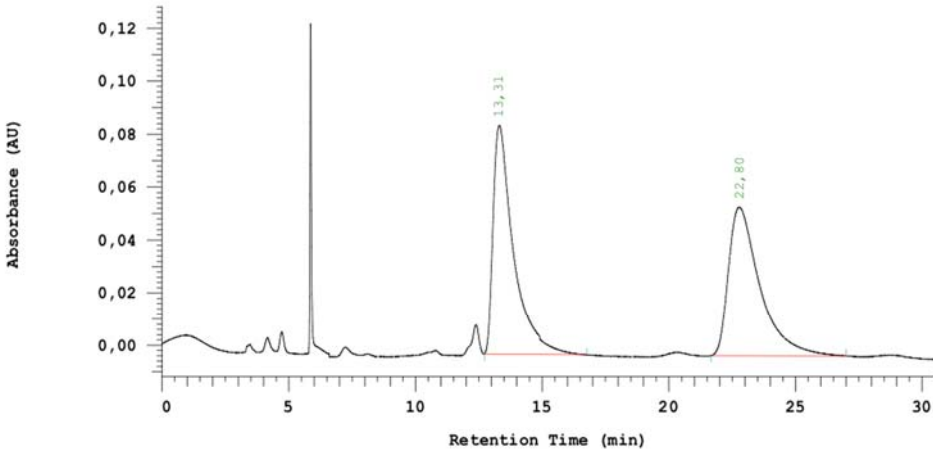

| No. | RT    | Area    | Area %  | Name       |
|-----|-------|---------|---------|------------|
| 1   | 13,31 | 2430170 | 49,960  | enant. (+) |
| 2   | 22,80 | 2434100 | 50,040  |            |
|     |       | 4864270 | 100,000 |            |

Sample Name: LC-104bis IC 8020 1mL

Vial Number: 1

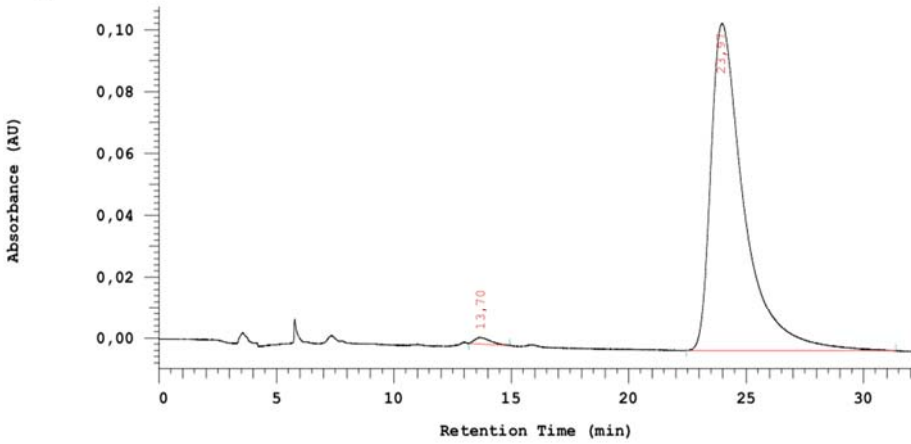

| No. | RT    | Area    | Area %  | Name       |
|-----|-------|---------|---------|------------|
| 1   | 13,70 | 47805   | 0,913   | enant. (+) |
| 2   | 23,97 | 5190070 | 99,087  |            |
|     |       | 5237875 | 100,000 |            |

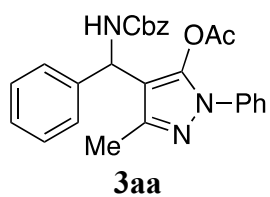

Sample Name: LC-114 IC 8020 1mL

Vial Number: 1

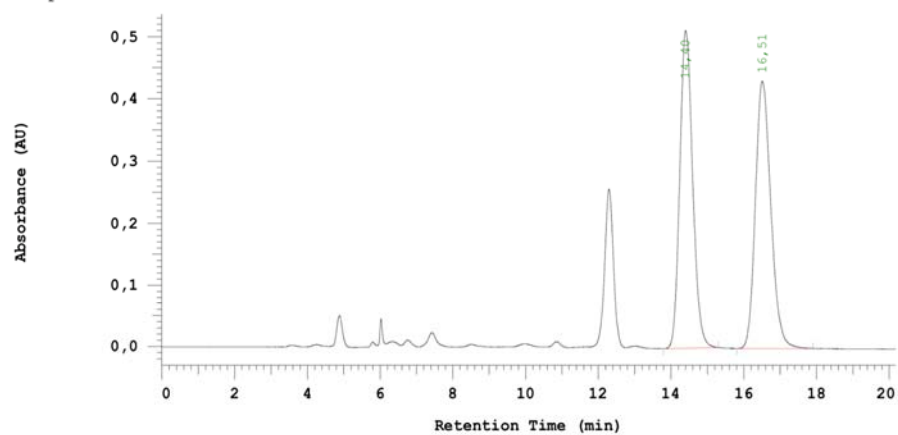

| No. | RT    | Area     | Area %  | Name |
|-----|-------|----------|---------|------|
| 1   | 14,40 | 6331190  | 49,764  |      |
| 2   | 16,51 | 6391150  | 50,236  |      |
|     |       | 12722340 | 100,000 |      |

Sample Name: LC-120Acetilat IC 8020 1mL

Vial Number: 1

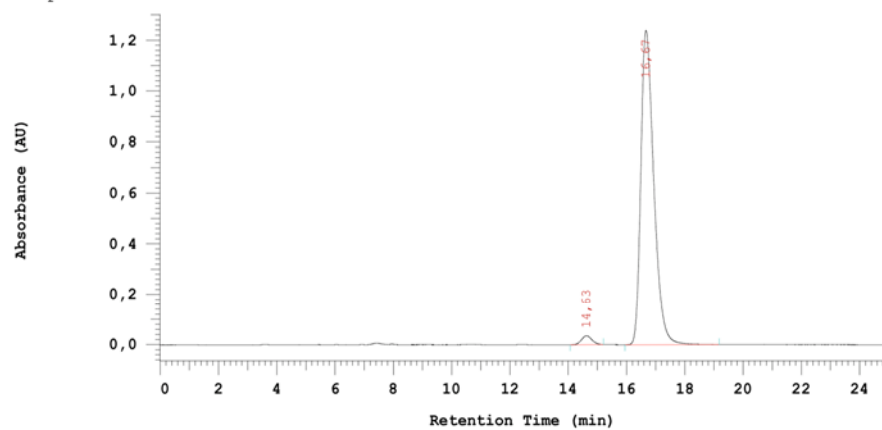

| No. | RT    | Area     | Area %  | Name |
|-----|-------|----------|---------|------|
| 1   | 14,63 | 429040   | 2,186   |      |
| 2   | 16,67 | 19195360 | 97,814  |      |
|     |       | 19624400 | 100,000 |      |

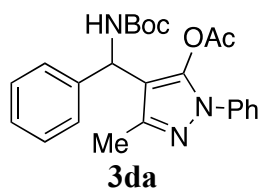

Sample Name: LC-118Acetilada IC 8020 1mL Vial Number: 1

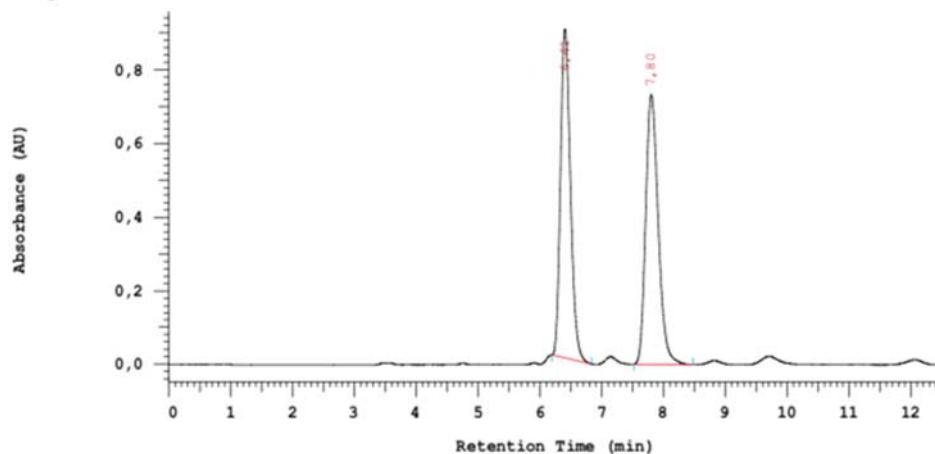

| No. | RT   | Area     | Area %  | Name |
|-----|------|----------|---------|------|
| 1   | 6,41 | 4946800  | 49,020  |      |
| 2   | 7,80 | 5144690  | 50,980  |      |
|     |      | 10091490 | 100,000 |      |

Sample Name: LC-122 IC 8020 1mL Vial Number: 1

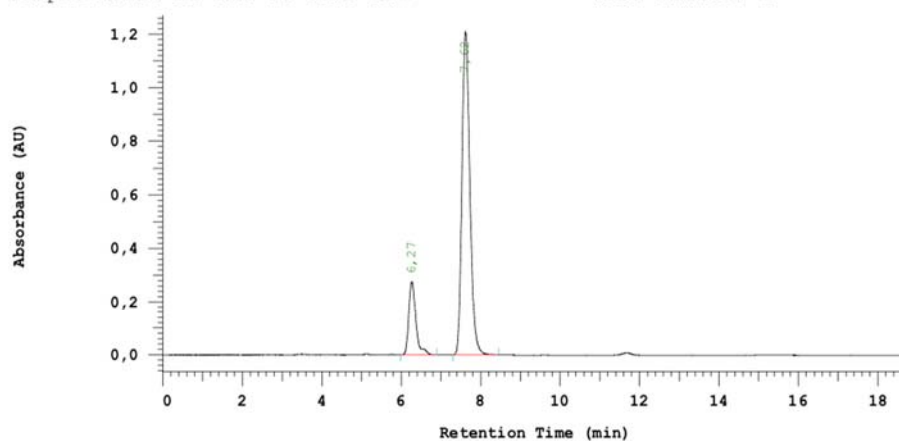

| No. | RT   | Area     | Area %  | Name |
|-----|------|----------|---------|------|
| 1   | 6,27 | 1724185  | 17,091  |      |
| 2   | 7,62 | 8364200  | 82,909  |      |
|     |      | 10088385 | 100,000 |      |

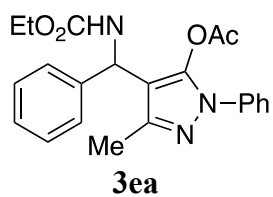

Sample Name: LC-106Acetilada IC 8020 1mL Vial Number: 1

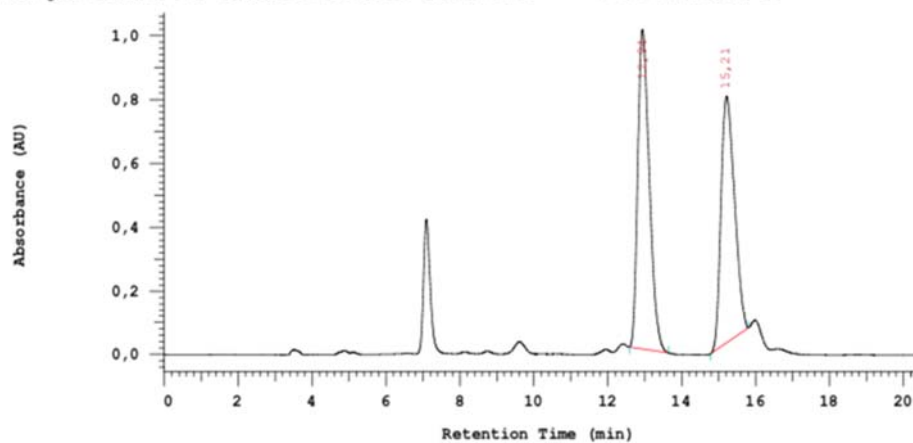

| No. | RT    | Area     | Area %  | Name |
|-----|-------|----------|---------|------|
| 1   | 12,94 | 10881209 | 52,584  |      |
| 2   | 15,21 | 9811849  | 47,416  |      |
|     |       | 20693058 | 100,000 |      |

Sample Name: LC-123 IC 8020 1mL Vial Number: 1

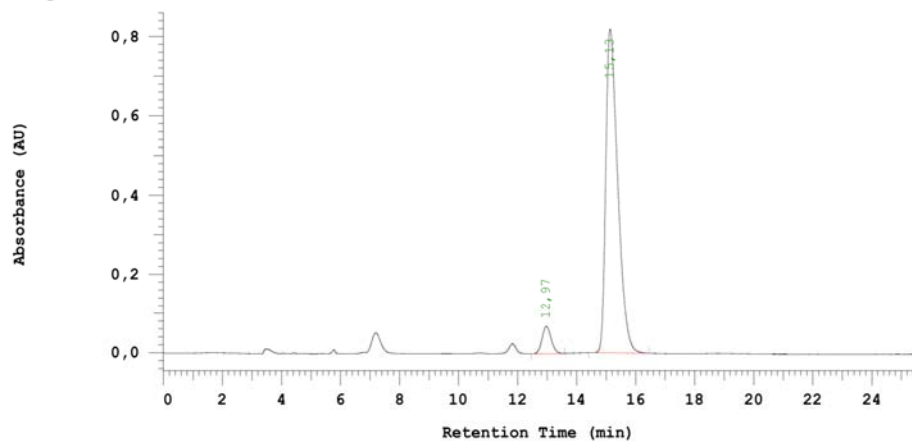

| No. | RT    | Area     | Area %  | Name |
|-----|-------|----------|---------|------|
| 1   | 12,97 | 731330   | 5,974   |      |
| 2   | 15,13 | 11511160 | 94,026  |      |
|     |       | 12242490 | 100,000 |      |

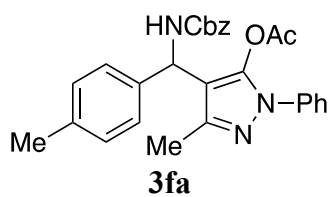

Sample Name: LC-127 ADH 8020 1mL

Vial Number: 1

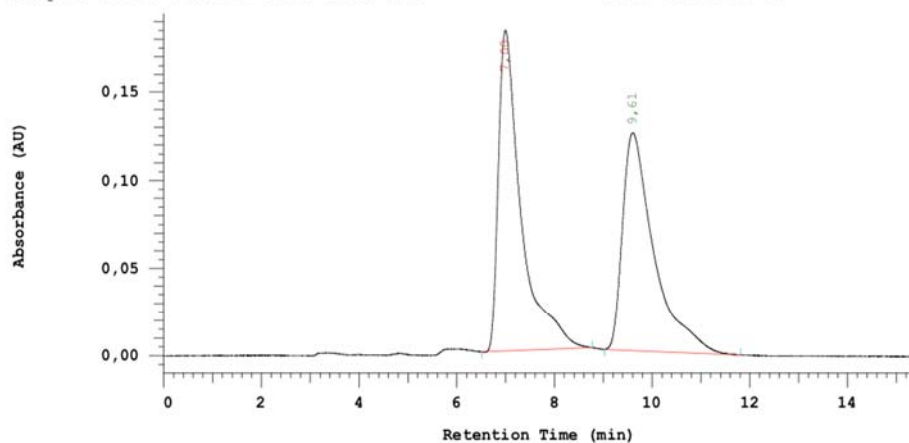

| No. | RT   | Area    | Area %  | Name |
|-----|------|---------|---------|------|
| 1   | 7,00 | 2956910 | 51,520  |      |
| 2   | 9,61 | 2782420 | 48,480  |      |
|     |      | 5739330 | 100,000 |      |

Sample Name: LC-127 ADH 8020 1mL

Vial Number: 1

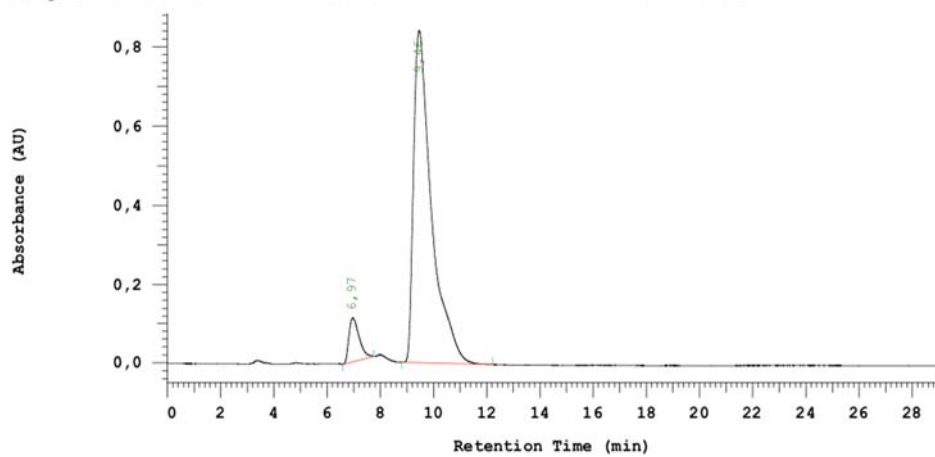

| No. | RT   | Area     | Area %  | Name |
|-----|------|----------|---------|------|
| 1   | 6,97 | 1472740  | 6,957   |      |
| 2   | 9,46 | 19697174 | 93,043  |      |
|     |      | 21169914 | 100,000 |      |



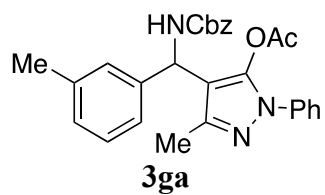

Sample Name: LC-119 IC 8020 1mL

Vial Number: 1

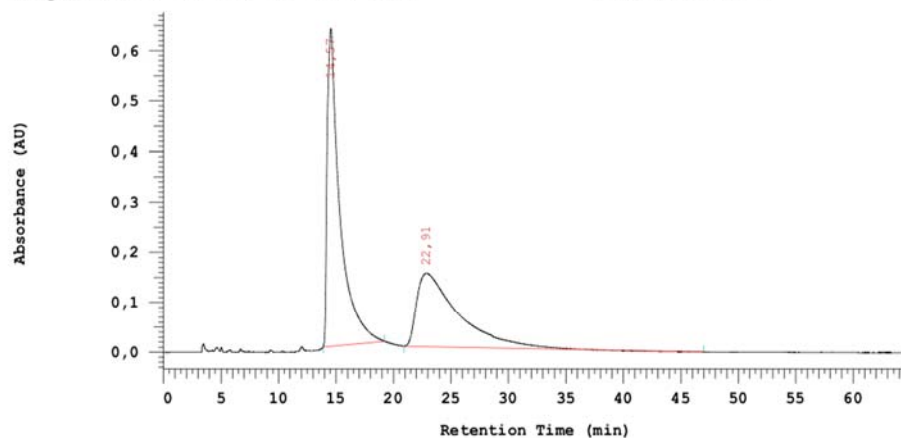

| No. | RT    | Area     | Area %  | Name       |
|-----|-------|----------|---------|------------|
| 1   | 14,57 | 23958320 | 56,442  | enant. (+) |
| 2   | 22,91 | 18489139 | 43,558  |            |
|     |       | 42447459 | 100,000 |            |

Sample Name: LC-125bis IC 8020 1mL

Vial Number: 1

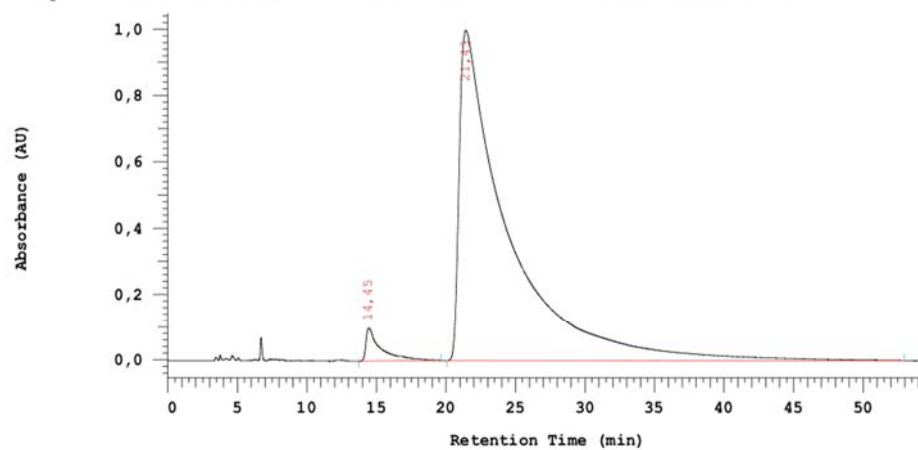

| No. | RT    | Area      | Area %  | Name |
|-----|-------|-----------|---------|------|
| 1   | 14,45 | 3713410   | 2,963   |      |
| 2   | 21,43 | 1,215E+08 | 97,037  |      |
|     |       | 1,253E+08 | 100,000 |      |

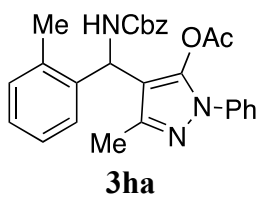

Sample Name: LC-118bis ADH 8020 1mL

Vial Number: 1

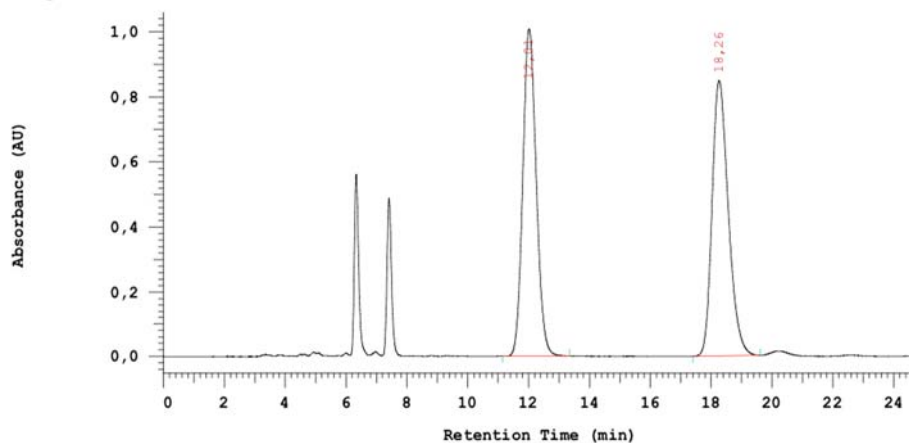

| No. | RT    | Area     | Area %  | Name |
|-----|-------|----------|---------|------|
| 1   | 12,01 | 15412030 | 49,541  |      |
| 2   | 18,26 | 15697740 | 50,459  |      |
|     |       | 31109770 | 100,000 |      |

Sample Name: LC-124bis ADH 8020 1mL

Vial Number: 1

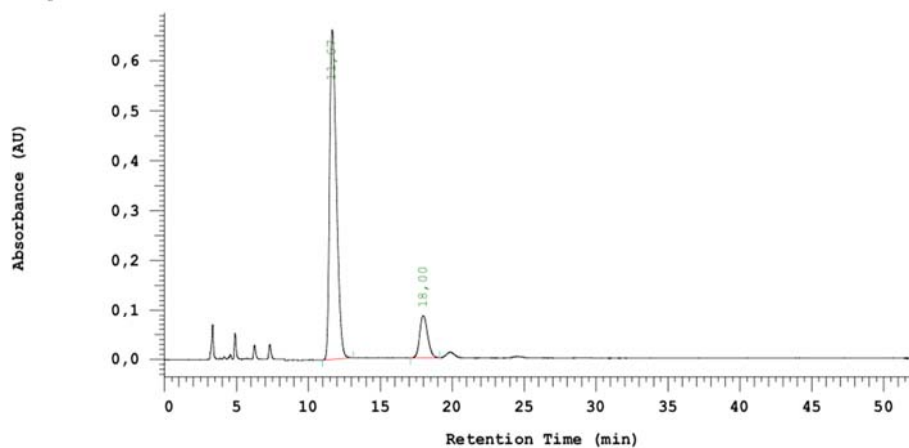

| No. | RT    | Area     | Area %  | Name |
|-----|-------|----------|---------|------|
| 1   | 11,67 | 10710855 | 87,044  |      |
| 2   | 18,00 | 1594300  | 12,956  |      |
|     |       | 12305155 | 100,000 |      |

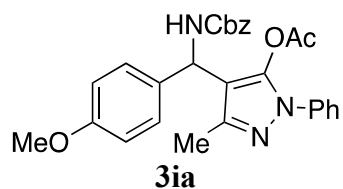

Sample Name: LC-128 IC 8020 1mL

Vial Number: 1

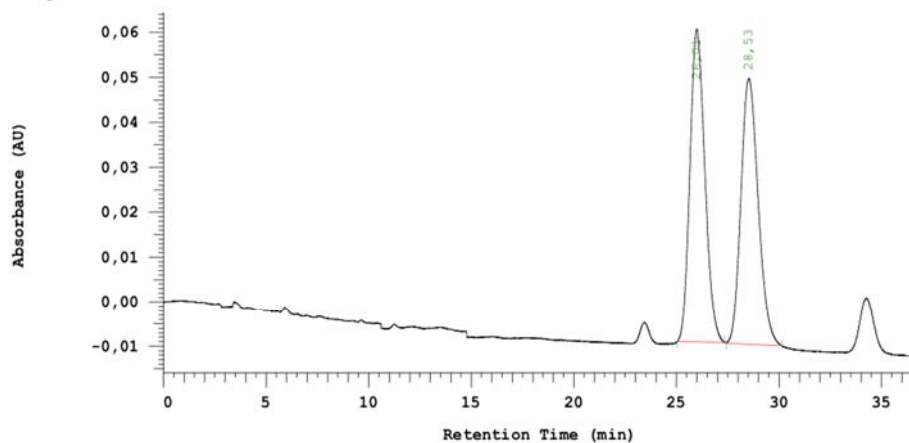

| No. | RT    | Area    | Area %  | Name       |
|-----|-------|---------|---------|------------|
| 1   | 26,01 | 1754400 | 50,335  | enant. (+) |
| 2   | 28,53 | 1731050 | 49,665  | enanti (-) |
|     |       | 3485450 | 100,000 |            |

Sample Name: LC-128 IC 8020 1mL

Vial Number: 1

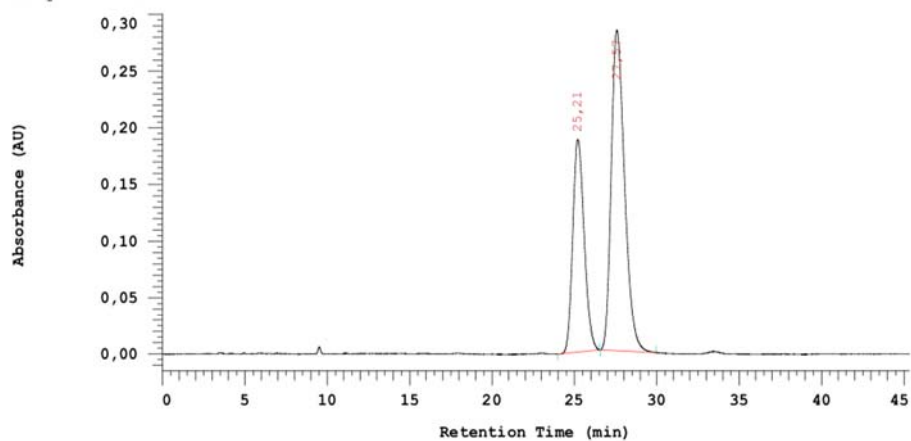

| No. | RT    | Area     | Area %  | Name       |
|-----|-------|----------|---------|------------|
| 1   | 25,21 | 4529540  | 36,303  | enant. (+) |
| 2   | 27,57 | 7947569  | 63,697  | enanti (-) |
|     |       | 12477109 | 100,000 |            |

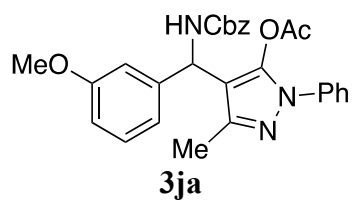

Sample Name: LC-160bis IC 8020 1mL

Vial Number: 1

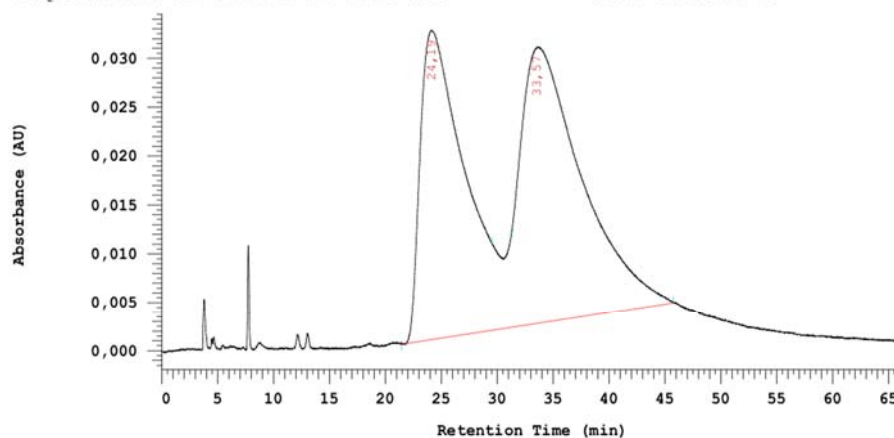

| No. | RT    | Area    | Area %  | Name       |
|-----|-------|---------|---------|------------|
| 1   | 24,19 | 4191734 | 43,854  | enant. (+) |
| 2   | 33,57 | 5366744 | 56,146  |            |
|     |       | 9558478 | 100,000 |            |

Sample Name: LC-160 IC 8020 1mL

Vial Number: 1

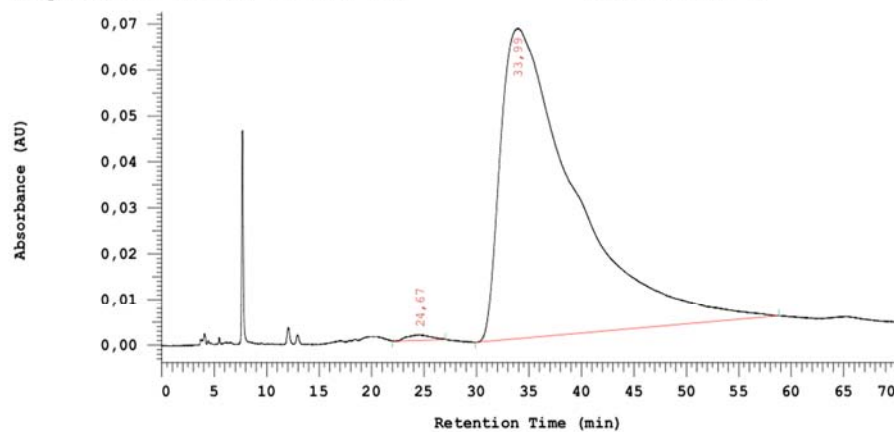

| No. | RT    | Area     | Area %  | Name       |
|-----|-------|----------|---------|------------|
| 1   | 24,67 | 86520    | 0,514   | enant. (+) |
| 2   | 33,99 | 16761974 | 99,486  |            |
|     |       | 16848494 | 100,000 |            |

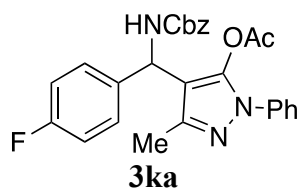

Sample Name: LC-132 IC 8020 1mL

Vial Number: 1

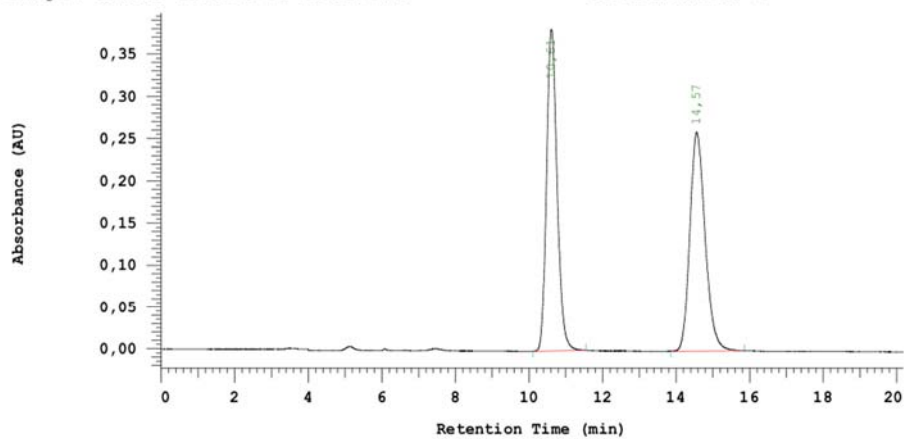

| No. | RT    | Area    | Area %  | Name |
|-----|-------|---------|---------|------|
| 1   | 10,61 | 3792495 | 50,123  |      |
| 2   | 14,57 | 3773870 | 49,877  |      |
|     |       | 7566365 | 100,000 |      |

Sample Name: LC-135 IC 8020 1mL

Vial Number: 1

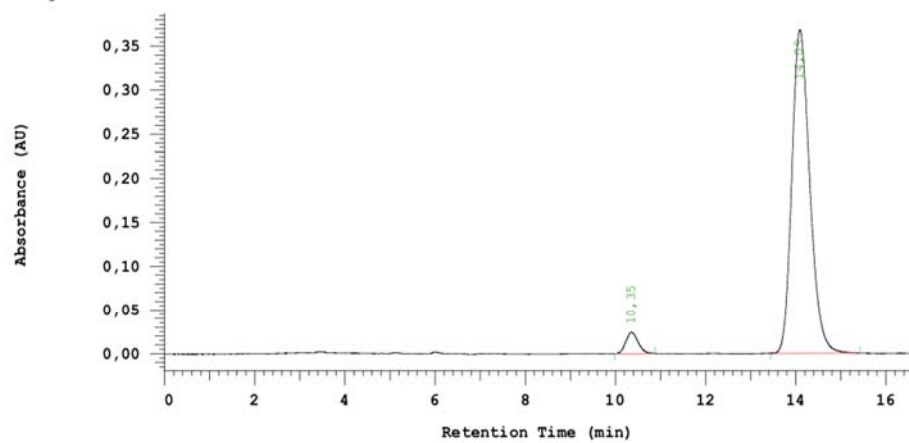

| No. | RT    | Area    | Area %  | Name |
|-----|-------|---------|---------|------|
| 1   | 10,35 | 227190  | 4,275   |      |
| 2   | 14,09 | 5086995 | 95,725  |      |
|     |       | 5314185 | 100,000 |      |

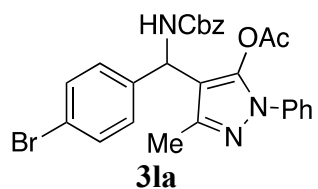

Sample Name: LC-134 IC 8020 1mL

Vial Number: 1

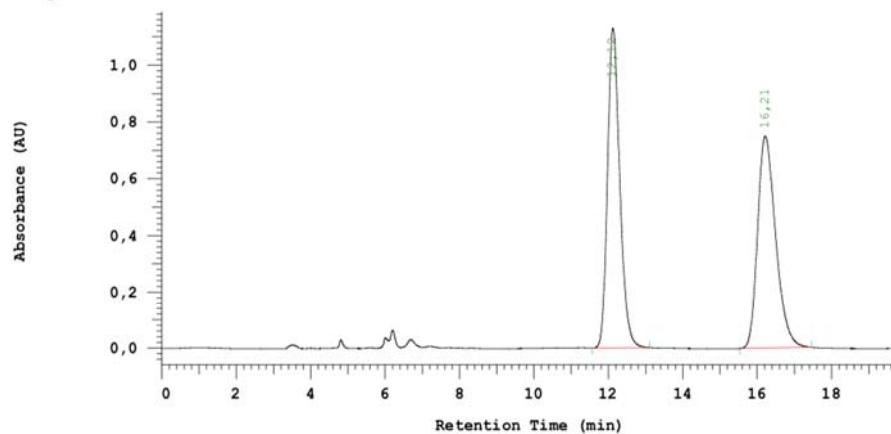

| No. | RT    | Area     | Area %  | Name |
|-----|-------|----------|---------|------|
| 1   | 12,12 | 12971480 | 50,584  |      |
| 2   | 16,21 | 12671800 | 49,416  |      |
|     |       | 25643280 | 100,000 |      |

Sample Name: LC-136 IC 8020 1mL

Vial Number: 1

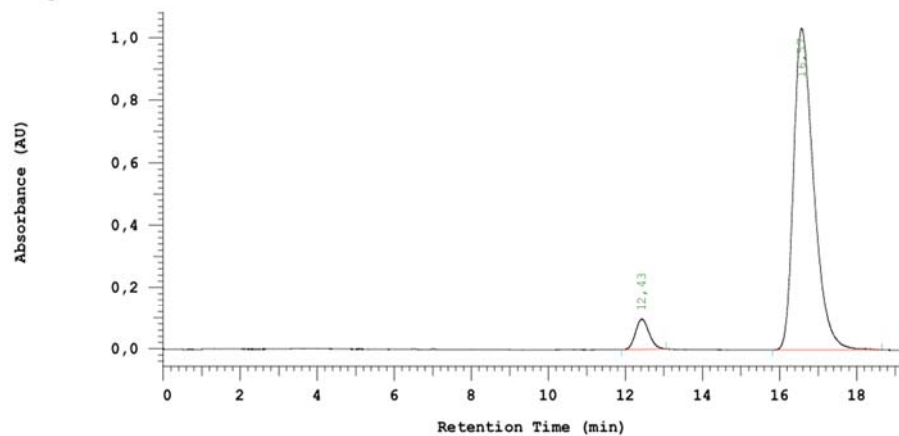

| No. | RT    | Area     | Area %  | Name |
|-----|-------|----------|---------|------|
| 1   | 12,43 | 1180760  | 5,895   |      |
| 2   | 16,57 | 18849420 | 94,105  |      |
|     |       | 20030180 | 100,000 |      |

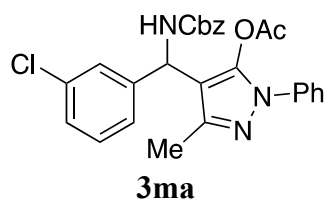

Sample Name: LC-158 ADH 8020 0.7mL

Vial Number: 1

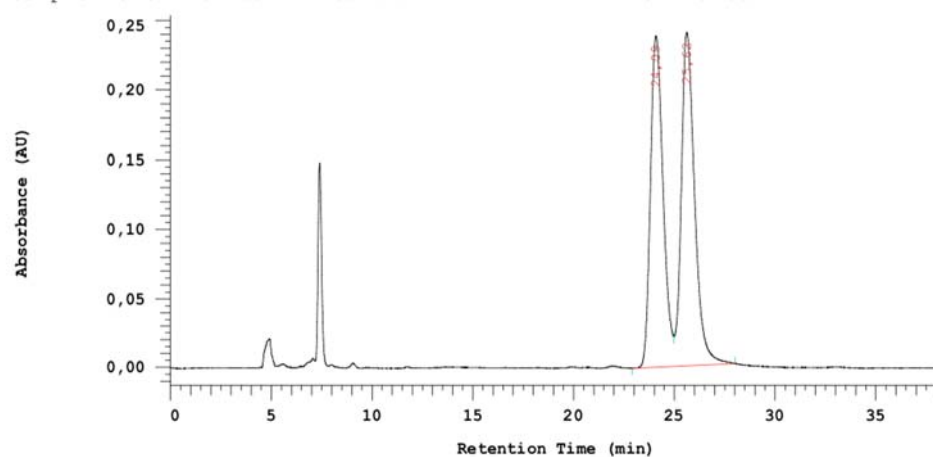

| No. | RT    | Area     | Area %  | Name       |
|-----|-------|----------|---------|------------|
| 1   | 24,09 | 5153338  | 48,254  | enant. (+) |
| 2   | 25,62 | 5526171  | 51,746  | enanti (-) |
|     |       | 10679509 | 100,000 |            |

Sample Name: LC-159 ADH 8020 0.7mL

Vial Number: 1

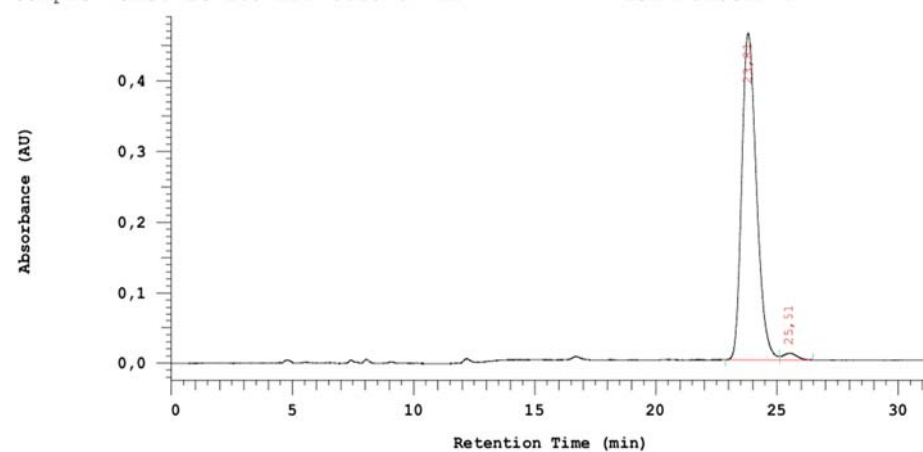

| No. | RT    | Area    | Area %  | Name       |
|-----|-------|---------|---------|------------|
| 1   | 23,81 | 9718180 | 98,183  | enant. (+) |
| 2   | 25,51 | 179871  | 1,817   | enanti (-) |
|     |       | 9898051 | 100,000 |            |

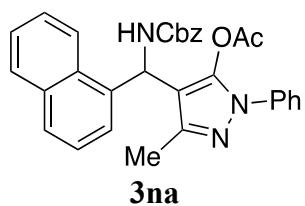

Sample Name: LC-162 ODH 8020 1mL

Vial Number: 1

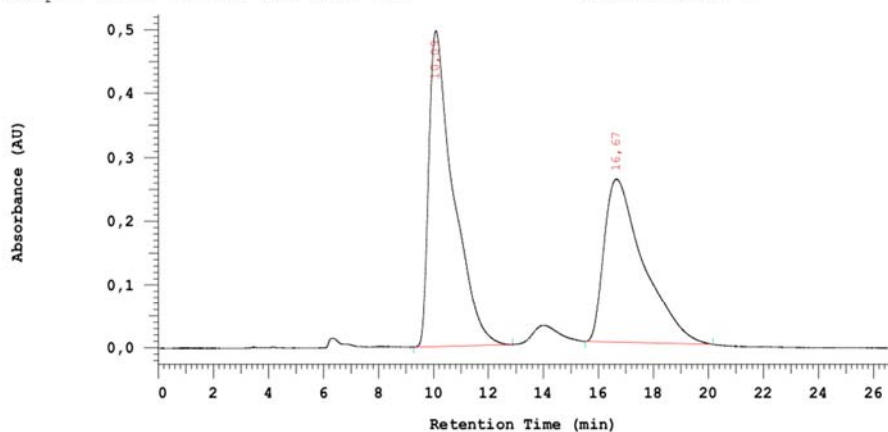

| No. | RT    | Area     | Area %  | Name |
|-----|-------|----------|---------|------|
| 1   | 10,09 | 15396760 | 54,465  |      |
| 2   | 16,67 | 12872420 | 45,535  |      |
|     |       | 28269180 | 100,000 |      |

Sample Name: LC-163 ODH 8020 1mL

Vial Number: 1

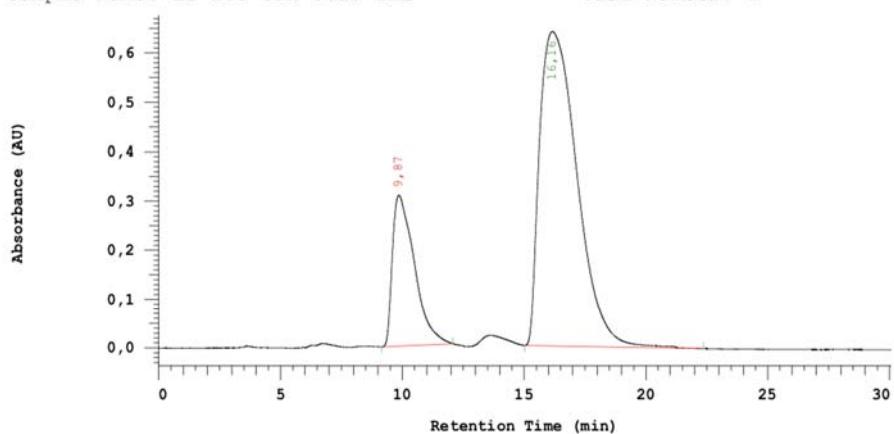

| No. | RT    | Area     | Area %  | Name |
|-----|-------|----------|---------|------|
| 1   | 9,87  | 9682200  | 22,059  |      |
| 2   | 16,16 | 34209724 | 77,941  |      |
|     |       | 43891924 | 100,000 |      |



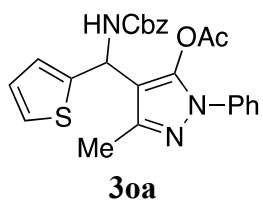

Sample Name: LC-151 IC 8020 1mL

Vial Number: 1

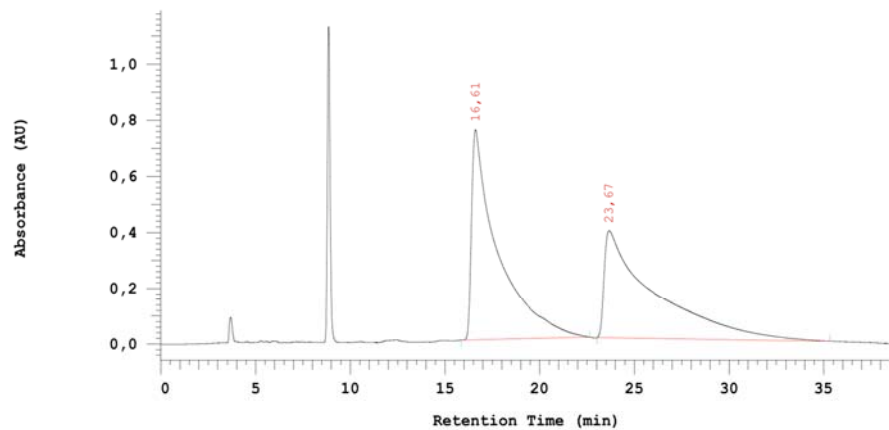

| No. | RT    | Area     | Area %  | Name       |
|-----|-------|----------|---------|------------|
| 1   | 16,61 | 36269891 | 50,791  | enant. (+) |
| 2   | 23,67 | 35139760 | 49,209  |            |
|     |       | 71409651 | 100,000 |            |

Sample Name: LC-152 IC 8020 1mL

Vial Number: 1

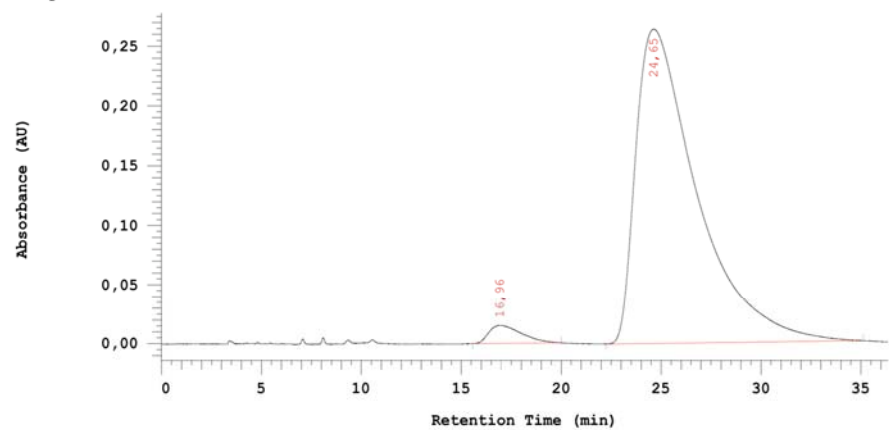

| No. | RT    | Area     | Area %  | Name       |
|-----|-------|----------|---------|------------|
| 1   | 16,96 | 851550   | 2,938   | enant. (+) |
| 2   | 24,65 | 28130195 | 97,062  |            |
|     |       | 28981745 | 100,000 |            |

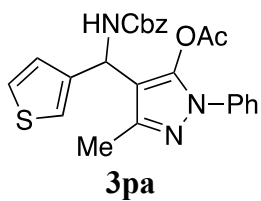

Sample Name: LC-156 IC 8020 1mL

Vial Number: 1

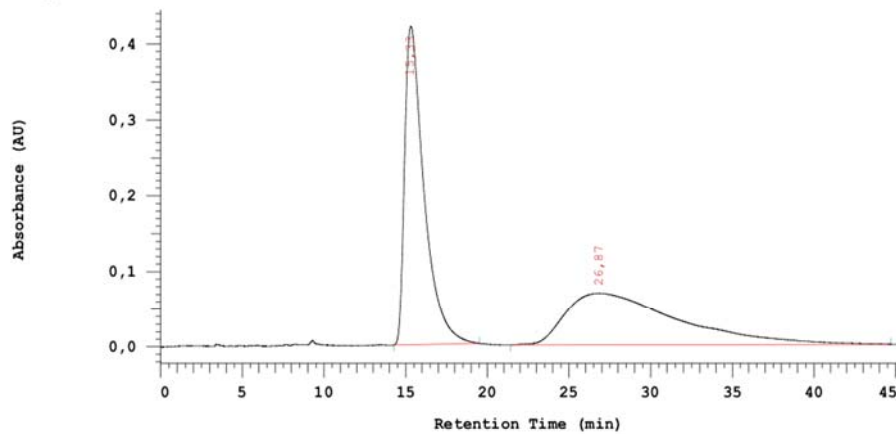

| No. | RT    | Area     | Area %  | Name       |
|-----|-------|----------|---------|------------|
| 1   | 15,33 | 17336540 | 51,508  | enanti (-) |
| 2   | 26,87 | 16321369 | 48,492  |            |
|     |       | 33657909 | 100,000 |            |

Sample Name: LC-157 IC 8020 1mL

Vial Number: 1

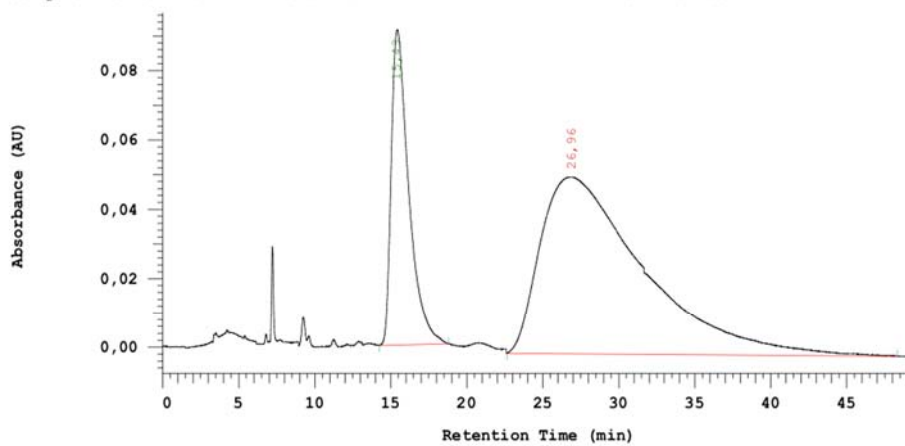

| No. | RT    | Area     | Area %  | Name       |
|-----|-------|----------|---------|------------|
| 1   | 15,43 | 3637450  | 23,107  | enanti (-) |
| 2   | 26,96 | 12104350 | 76,893  |            |
|     |       | 15741800 | 100,000 |            |

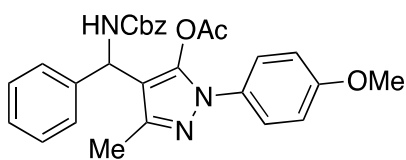

**3ab**

Sample Name: LC-176 ODH 8020 1mL

Vial Number: 1

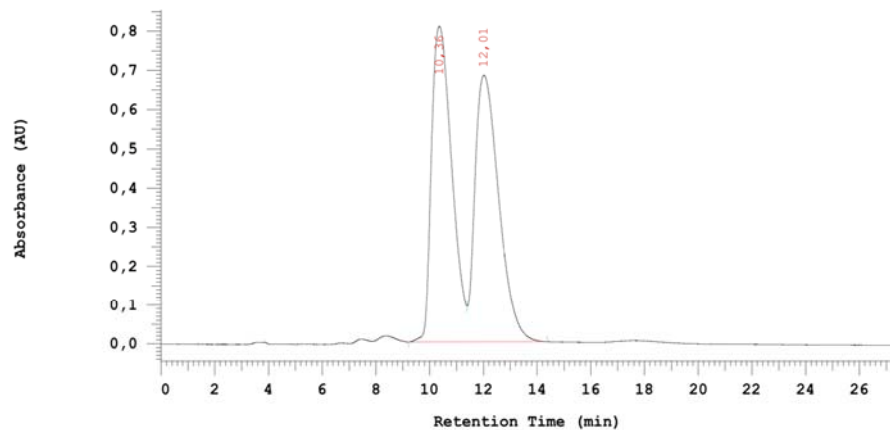

| No. | RT    | Area     | Area %  | Name |
|-----|-------|----------|---------|------|
| 1   | 10,36 | 21200481 | 49,999  |      |
| 2   | 12,01 | 21201182 | 50,001  |      |
|     |       | 42401663 | 100,000 |      |

Sample Name: LC-177 ODH 8020 1mL

Vial Number: 1

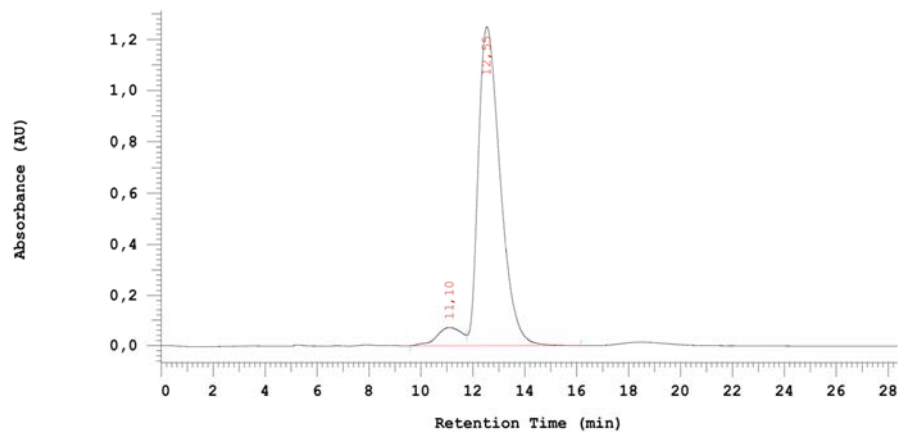

| No. | RT    | Area     | Area %  | Name |
|-----|-------|----------|---------|------|
| 1   | 11,10 | 2365036  | 6,042   |      |
| 2   | 12,55 | 36775782 | 93,958  |      |
|     |       | 39140818 | 100,000 |      |

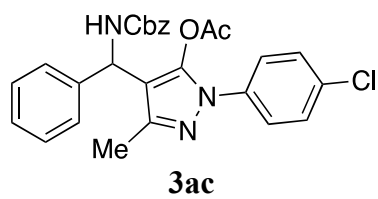

Sample Name: LC-174 ADH 8020 1mL

Vial Number: 1

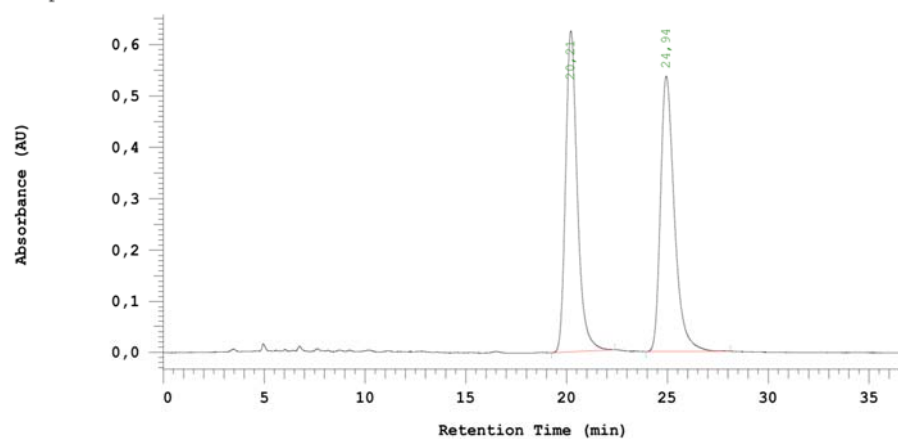

| No. | RT    | Area     | Area %  | Name       |
|-----|-------|----------|---------|------------|
| 1   | 20,21 | 12665635 | 49,713  | enant. (+) |
| 2   | 24,94 | 12812049 | 50,287  |            |
|     |       | 25477684 | 100,000 |            |

Sample Name: FC-32 EN ASH 8020 1mL

Vial Number: 1

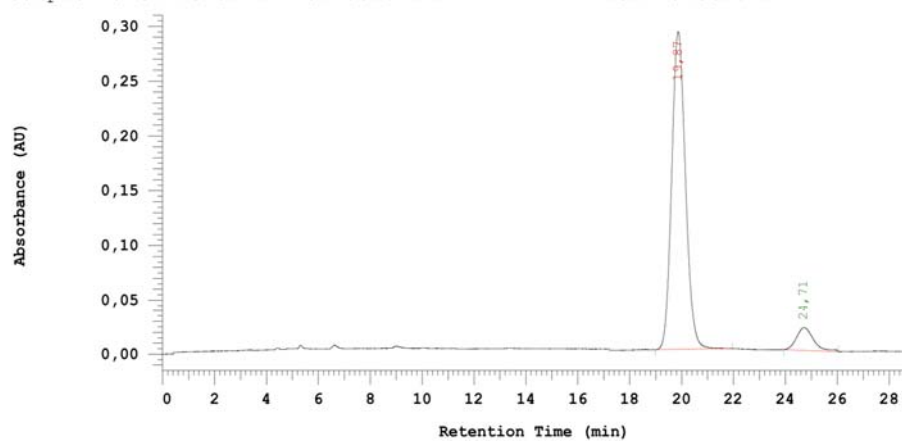

| No. | RT    | Area    | Area %  | Name       |
|-----|-------|---------|---------|------------|
| 1   | 19,87 | 5339830 | 91,965  | enant. (+) |
| 2   | 24,71 | 466560  | 8,035   |            |
|     |       | 5806390 | 100,000 |            |

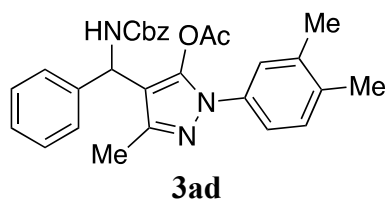

Sample Name: LC-180 ODH 8020 1mL

Vial Number: 1

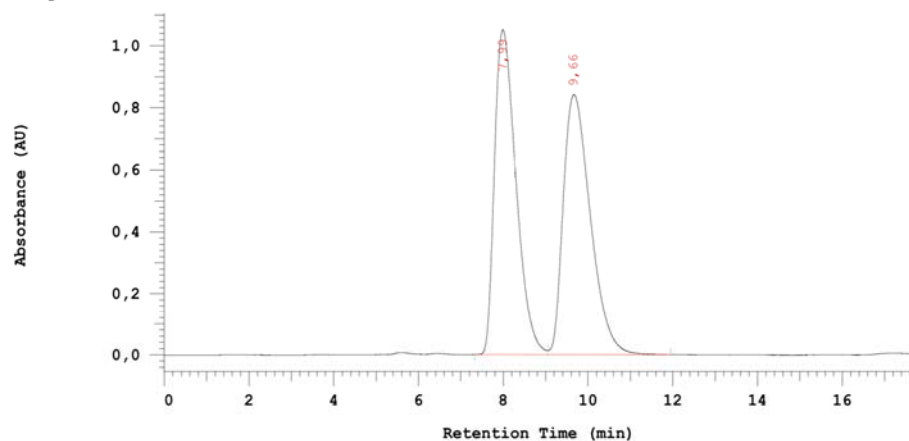

| No. | RT   | Area     | Area %  | Name |
|-----|------|----------|---------|------|
| 1   | 7,99 | 18575299 | 49,691  |      |
| 2   | 9,66 | 18806489 | 50,309  |      |
|     |      | 37381788 | 100,000 |      |

Sample Name: LC-180 ODH 8020 1mL

Vial Number: 1

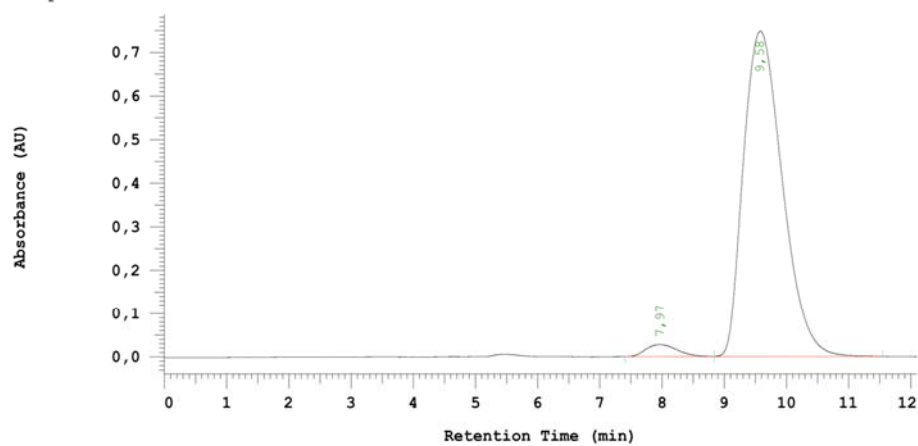

| No. | RT   | Area     | Area %  | Name |
|-----|------|----------|---------|------|
| 1   | 7,97 | 487571   | 2,905   |      |
| 2   | 9,58 | 16295784 | 97,095  |      |
|     |      | 16783355 | 100,000 |      |

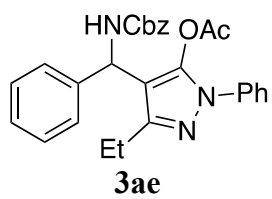

Sample Name: LC-178 ODH 8020 1mL

Vial Number: 1

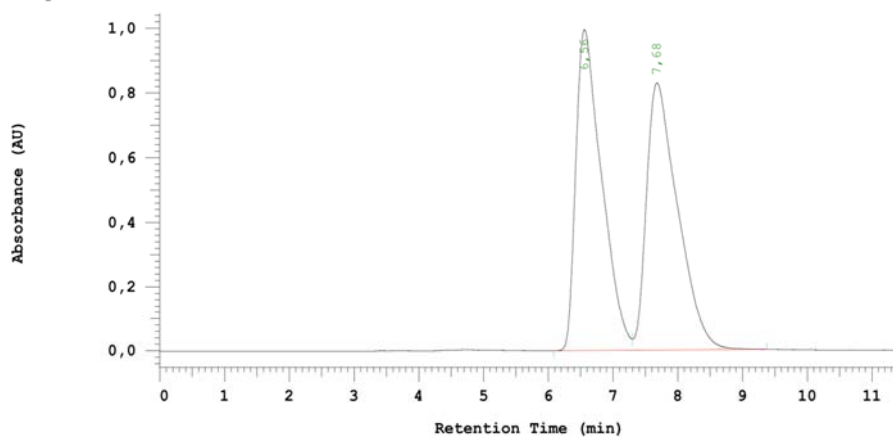

| No. | RT   | Area     | Area %  | Name |
|-----|------|----------|---------|------|
| 1   | 6,56 | 13827811 | 49,772  |      |
| 2   | 7,68 | 13954414 | 50,228  |      |
|     |      | 27782225 | 100,000 |      |

Sample Name: LC-179 ODH 8020 1mL

Vial Number: 1

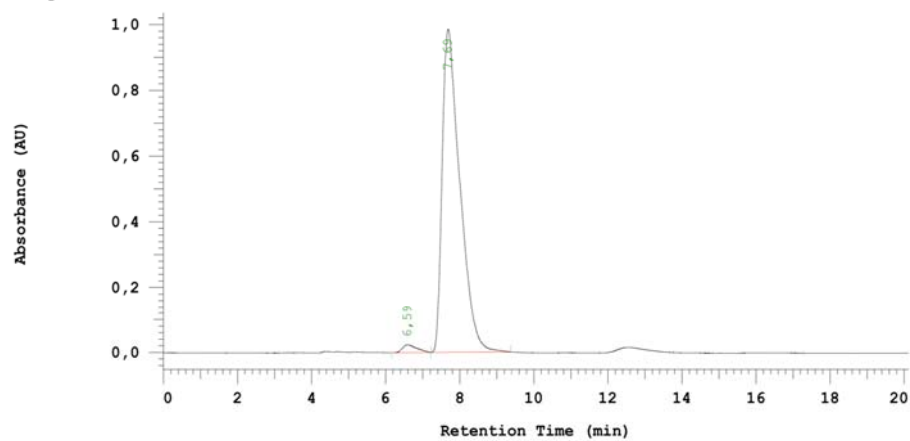

| No. | RT   | Area     | Area %  | Name |
|-----|------|----------|---------|------|
| 1   | 6,59 | 318154   | 1,900   |      |
| 2   | 7,69 | 16426056 | 98,100  |      |
|     |      | 16744210 | 100,000 |      |

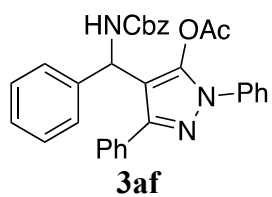

Sample Name: LC-139 ADH 8020 1mL

Vial Number: 1

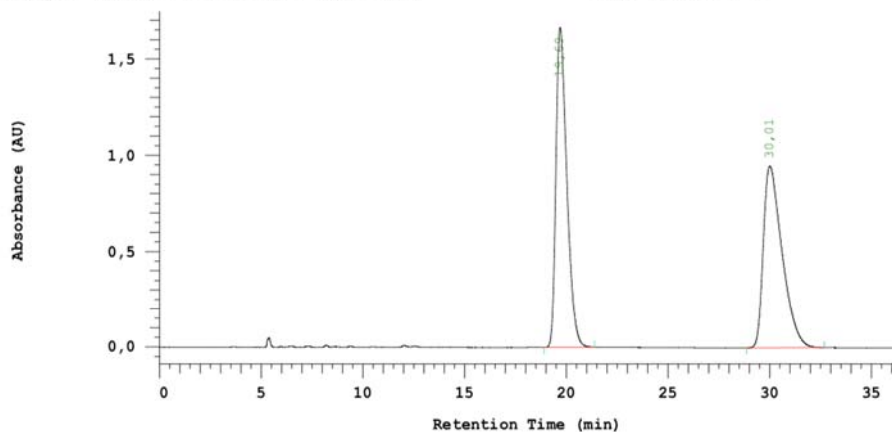

| No. | RT    | Area     | Area %  | Name       |
|-----|-------|----------|---------|------------|
| 1   | 19,69 | 30805289 | 50,342  | enanti (-) |
| 2   | 30,01 | 30386265 | 49,658  |            |
|     |       | 61191554 | 100,000 |            |

Sample Name: LC-140 ADH 8020 1mL

Vial Number: 1

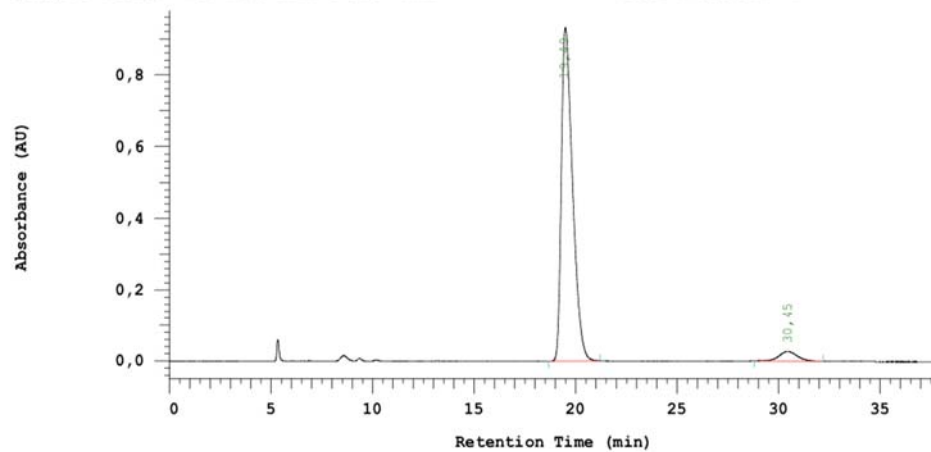

| No. | RT    | Area     | Area %  | Name       |
|-----|-------|----------|---------|------------|
| 1   | 19,49 | 17651950 | 95,474  | enanti (-) |
| 2   | 30,45 | 836740   | 4,526   |            |
|     |       | 18488690 | 100,000 |            |

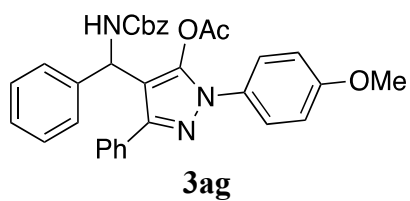

Sample Name: LC-148bis IC 8020 1mL Vial Number: 1

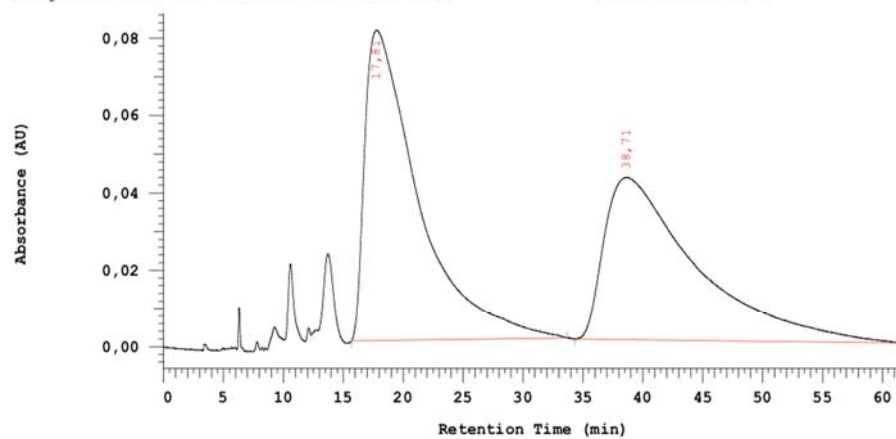

| No. | RT    | Area     | Area %  | Name |
|-----|-------|----------|---------|------|
| 1   | 17,81 | 12530060 | 52,705  |      |
| 2   | 38,71 | 11243664 | 47,295  |      |
|     |       | 23773724 | 100,000 |      |

Sample Name: LC-149 IC 8020 1mL Vial Number: 1

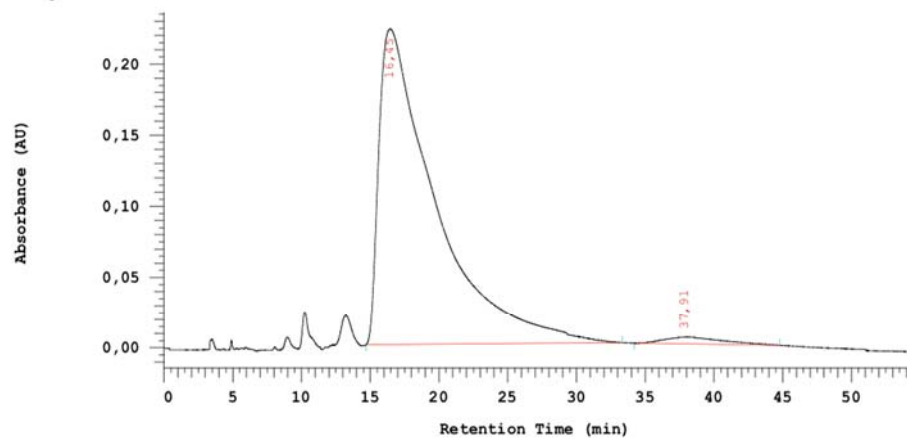

| No. | RT    | Area     | Area %  | Name |
|-----|-------|----------|---------|------|
| 1   | 16,45 | 31679993 | 97,862  |      |
| 2   | 37,91 | 692055   | 2,138   |      |
|     |       | 32372048 | 100,000 |      |



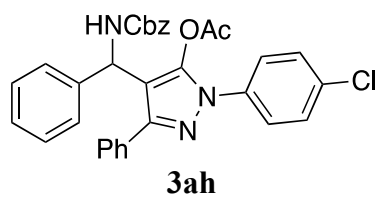

Sample Name: LC-142 IC 8020 1mL

Vial Number: 1

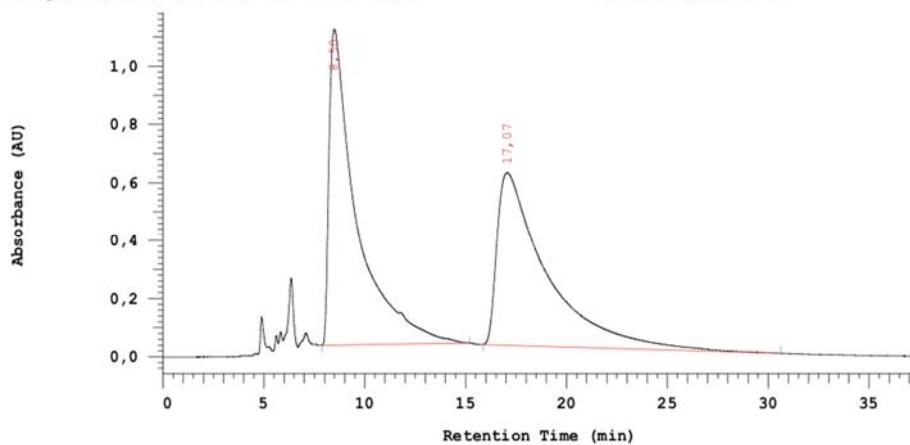

| No. | RT    | Area      | Area %  | Name |
|-----|-------|-----------|---------|------|
| 1   | 8,50  | 51275449  | 50,384  |      |
| 2   | 17,07 | 50493411  | 49,616  |      |
|     |       | 1,017E+08 | 100,000 |      |

Sample Name: LC-143-bis IC 8020 1mL

Vial Number: 1

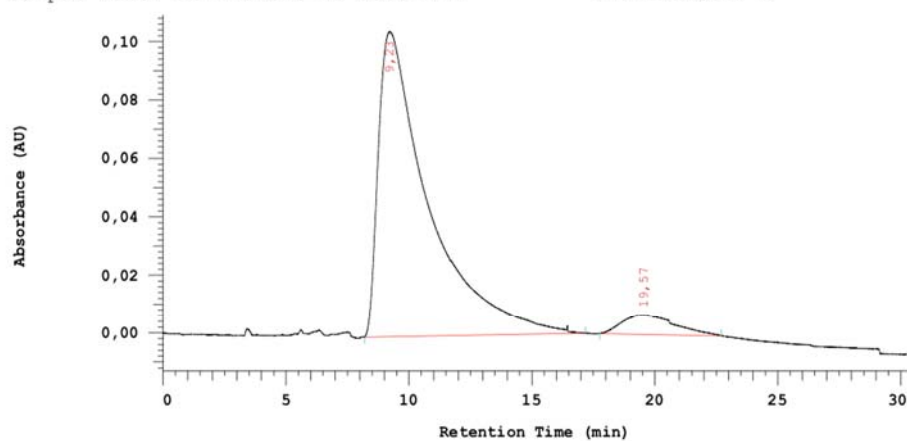

| No. | RT    | Area    | Area %  | Name |
|-----|-------|---------|---------|------|
| 1   | 9,23  | 7407270 | 93,638  |      |
| 2   | 19,57 | 503265  | 6,362   |      |
|     |       | 7910535 | 100,000 |      |

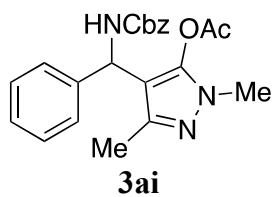

Sample Name: LC-141bis ADH 8020 1mL

Vial Number: 1

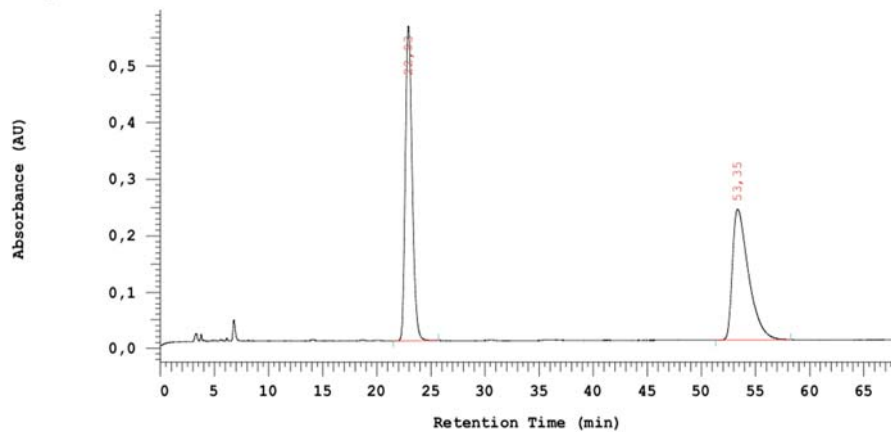

| No. | RT    | Area     | Area %  | Name       |
|-----|-------|----------|---------|------------|
| 1   | 22,93 | 11992324 | 50,007  | enant. (+) |
| 2   | 53,35 | 11989009 | 49,993  |            |
|     |       | 23981333 | 100,000 |            |

Sample Name: LC-144bis ADH 8020 1mL

Vial Number: 1

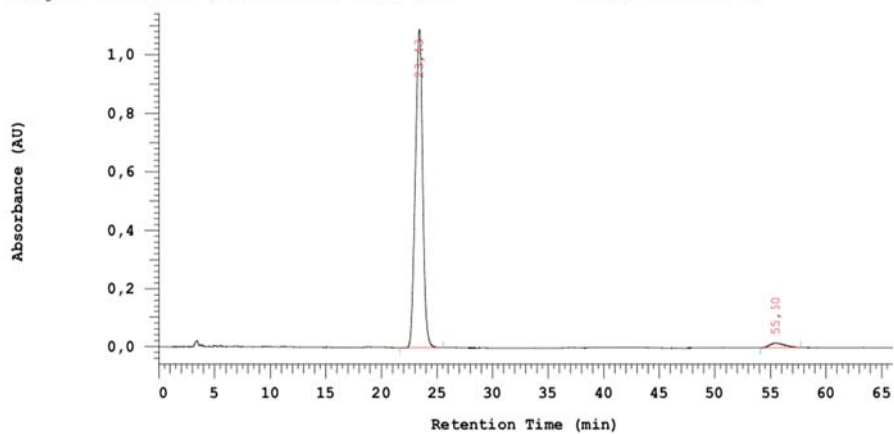

| No. | RT    | Area     | Area %  | Name       |
|-----|-------|----------|---------|------------|
| 1   | 23,43 | 24546510 | 97,070  | enant. (+) |
| 2   | 55,50 | 740795   | 2,930   |            |
|     |       | 25287305 | 100,000 |            |

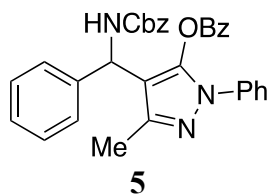

Sample Name: LC-184c ADH 8020 1mL

Vial Number: 1

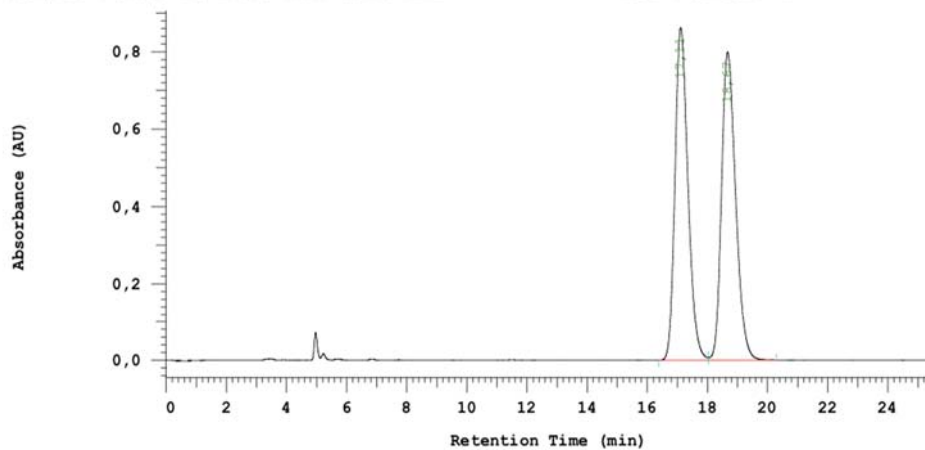

| No. | RT    | Area     | Area %  | Name |
|-----|-------|----------|---------|------|
| 1   | 17,11 | 12941508 | 49,906  |      |
| 2   | 18,67 | 12990432 | 50,094  |      |
|     |       | 25931940 | 100,000 |      |

Sample Name: LC-185 ADH 8020 1mL

Vial Number: 1

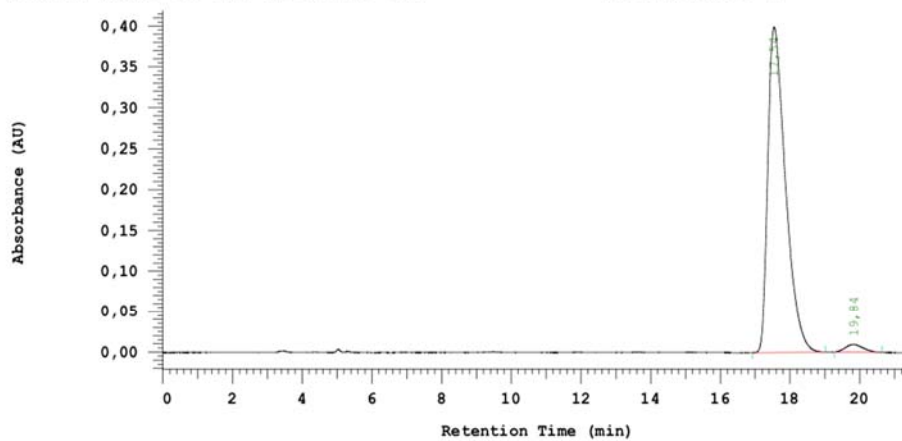

| No. | RT    | Area    | Area %  | Name |
|-----|-------|---------|---------|------|
| 1   | 17,54 | 7034790 | 97,698  |      |
| 2   | 19,84 | 165780  | 2,302   |      |
|     |       | 7200570 | 100,000 |      |

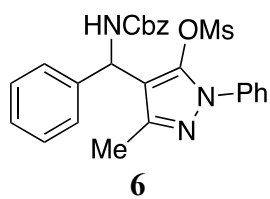

Sample Name: LC-184b Amilose1 8020 1mL Vial Number: 1

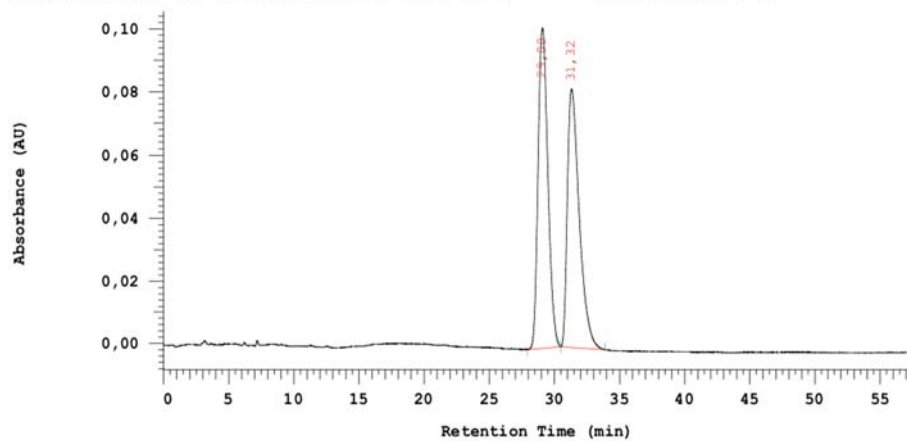

| No. | RT    | Area    | Area %  | Name       |
|-----|-------|---------|---------|------------|
| 1   | 29,08 | 2625440 | 50,307  | enanti (-) |
| 2   | 31,32 | 2593375 | 49,693  |            |
|     |       | 5218815 | 100,000 |            |

Sample Name: LC-186 Amilose1 8020 1mL Vial Number: 1

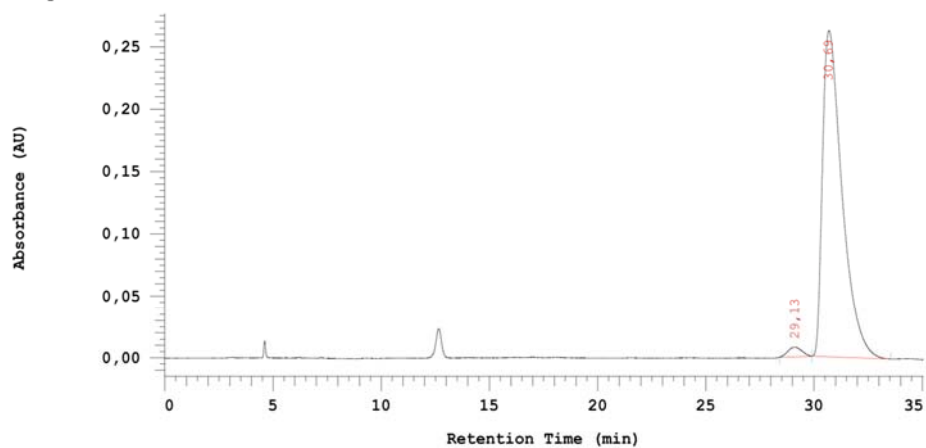

| No. | RT    | Area    | Area %  | Name       |
|-----|-------|---------|---------|------------|
| 1   | 29,13 | 172575  | 2,053   | enanti (-) |
| 2   | 30,69 | 8231889 | 97,947  |            |
|     |       | 8404464 | 100,000 |            |

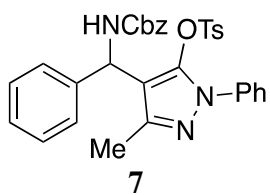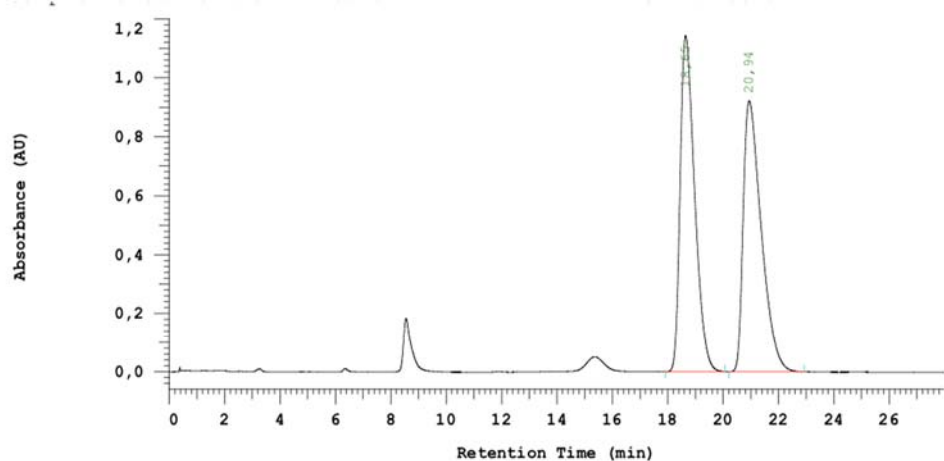

| No. | RT    | Area     | Area %  | Name |
|-----|-------|----------|---------|------|
| 1   | 18,65 | 20786590 | 49,976  |      |
| 2   | 20,94 | 20806289 | 50,024  |      |
|     |       | 41592879 | 100,000 |      |

Sample Name: LC-196 ADH 8020 1mL

Vial Number: 1

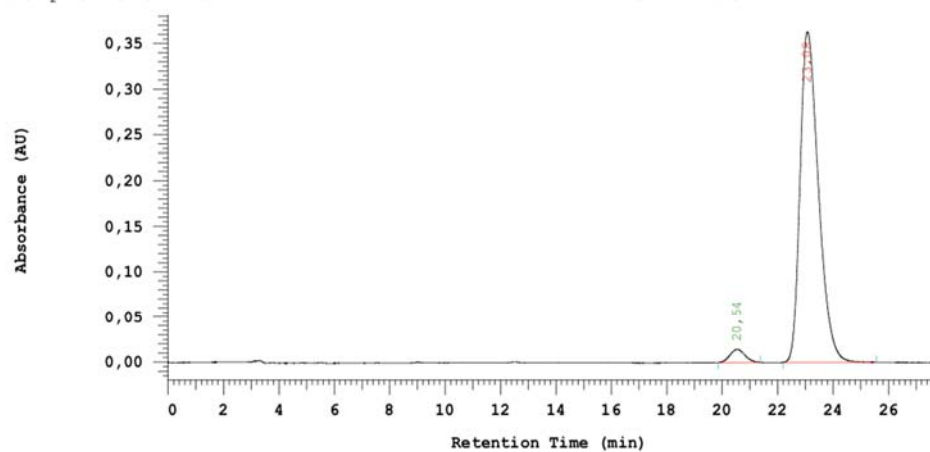

| No. | RT    | Area    | Area %  | Name       |
|-----|-------|---------|---------|------------|
| 1   | 20,54 | 265270  | 3,069   |            |
| 2   | 23,08 | 8378510 | 96,931  | enant. (+) |
|     |       | 8643780 | 100,000 |            |

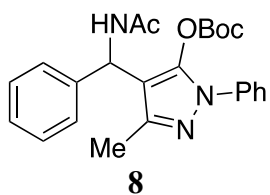

Sample Name: LC-189 IC 8020 1mL

Vial Number: 1

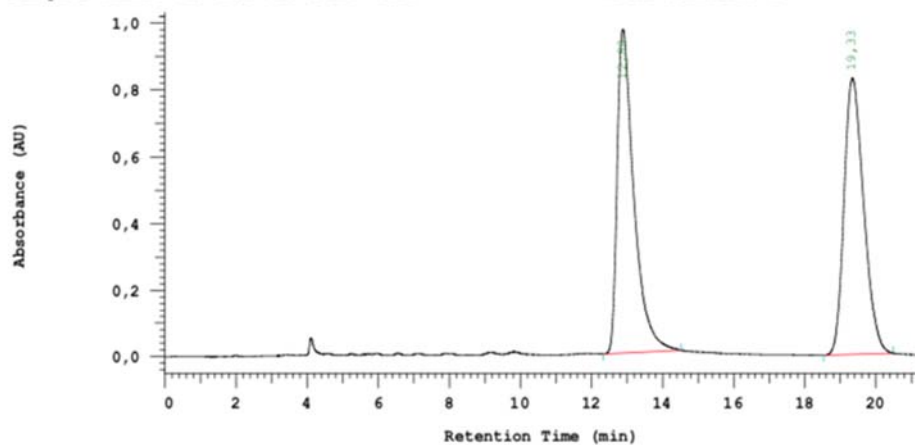

| No. | RT    | Area     | Area %  | Name |
|-----|-------|----------|---------|------|
| 1   | 12,88 | 15920220 | 50,051  |      |
| 2   | 19,33 | 15887875 | 49,949  |      |
|     |       | 31808095 | 100,000 |      |

Sample Name: LC-189 IC 8020 1mL

Vial Number: 1

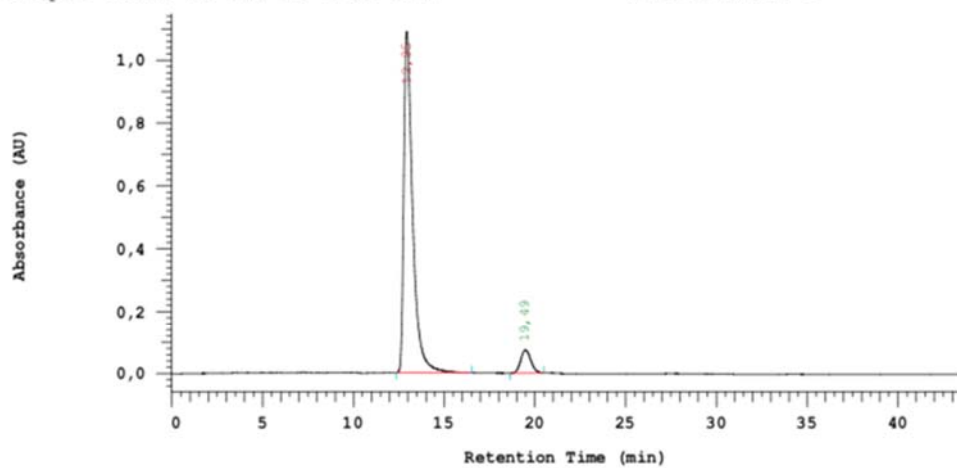

| No. | RT    | Area     | Area %  | Name |
|-----|-------|----------|---------|------|
| 1   | 12,95 | 18180979 | 92,832  |      |
| 2   | 19,49 | 1403770  | 7,168   |      |
|     |       | 19584749 | 100,000 |      |

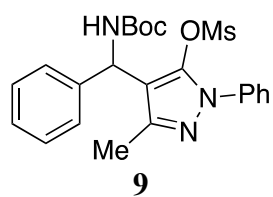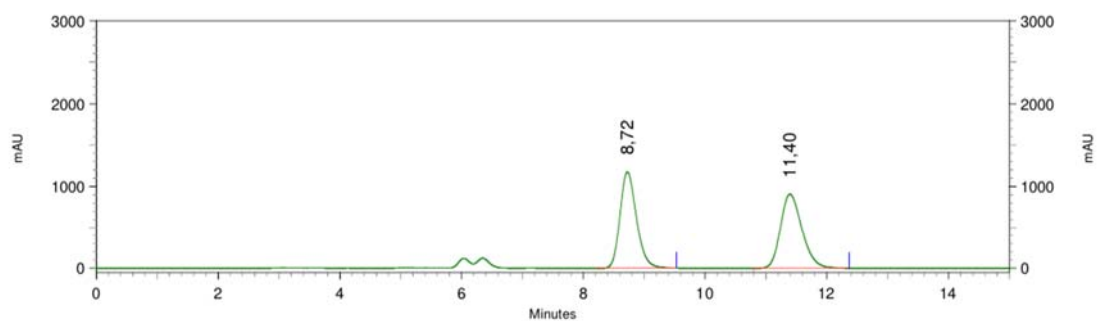

11: 252 nm, 4 nm

Results

| Retention Time | Area     | Area Percent |
|----------------|----------|--------------|
| 8,72           | 88647130 | 49,937       |
| 11,40          | 88870454 | 50,063       |

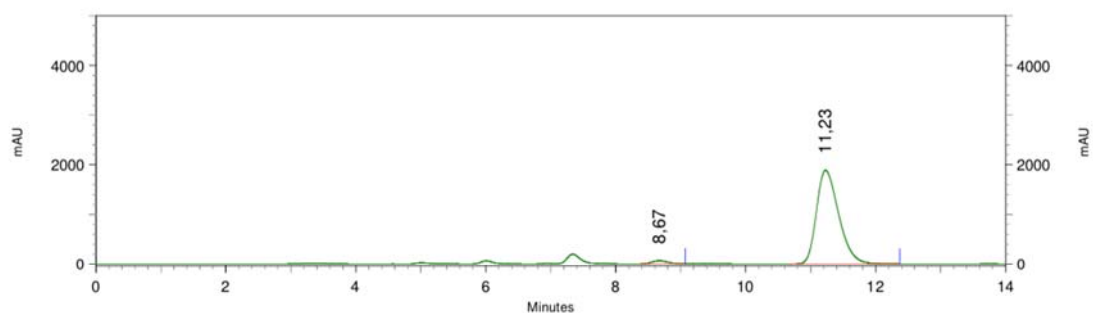

11: 252 nm, 4 nm

Results

| Retention Time | Area      | Area Percent |
|----------------|-----------|--------------|
| 8,67           | 4714475   | 2,554        |
| 11,23          | 179870537 | 97,446       |
